# Supplementary material
Source: publisher site journal article supplement (https://www.dovepress.com/article/275452)
Supplement: Supplementary file 1 [file get_supplementary_file.php]

**Supplementary materials**

**Secretory pathway kinase FAM20C, a marker for glioma invasion and malignancy, predicts poor prognosis of glioma**

Shaonan Dua, Shu Guanb, Chen Zhua, Qing Guoa, Jingyuan Caoa, Gefei Guana, Wen Chenga, Peng Chenga, *, Anhua Wua, c, *

a Department of Neurosurgery, The First Hospital of China Medical University, Shenyang, Liaoning, China

b Department of Surgical Oncology and Breast Surgery, The First Hospital of China Medical University, Shenyang, China

c College of Applied technology, China Medical University, Shenyang, Liaoning 110122, China

***Corresponding authors:**

A. Wu, The First Hospital of China Medical University, No.155 Nanjingbei Street, Heping District, Shenyang, Liaoning 110001, China

E-mail address: ahwu@cmu.edu.cn

P. Cheng, The First Hospital of China Medical University, No.155 Nanjingbei Street, Heping District, Shenyang, Liaoning 110001, China

E-mail address:chengpengcmu@sina.com

**Supplementary Figures, and Tables**

**Supplementary Figures**

**
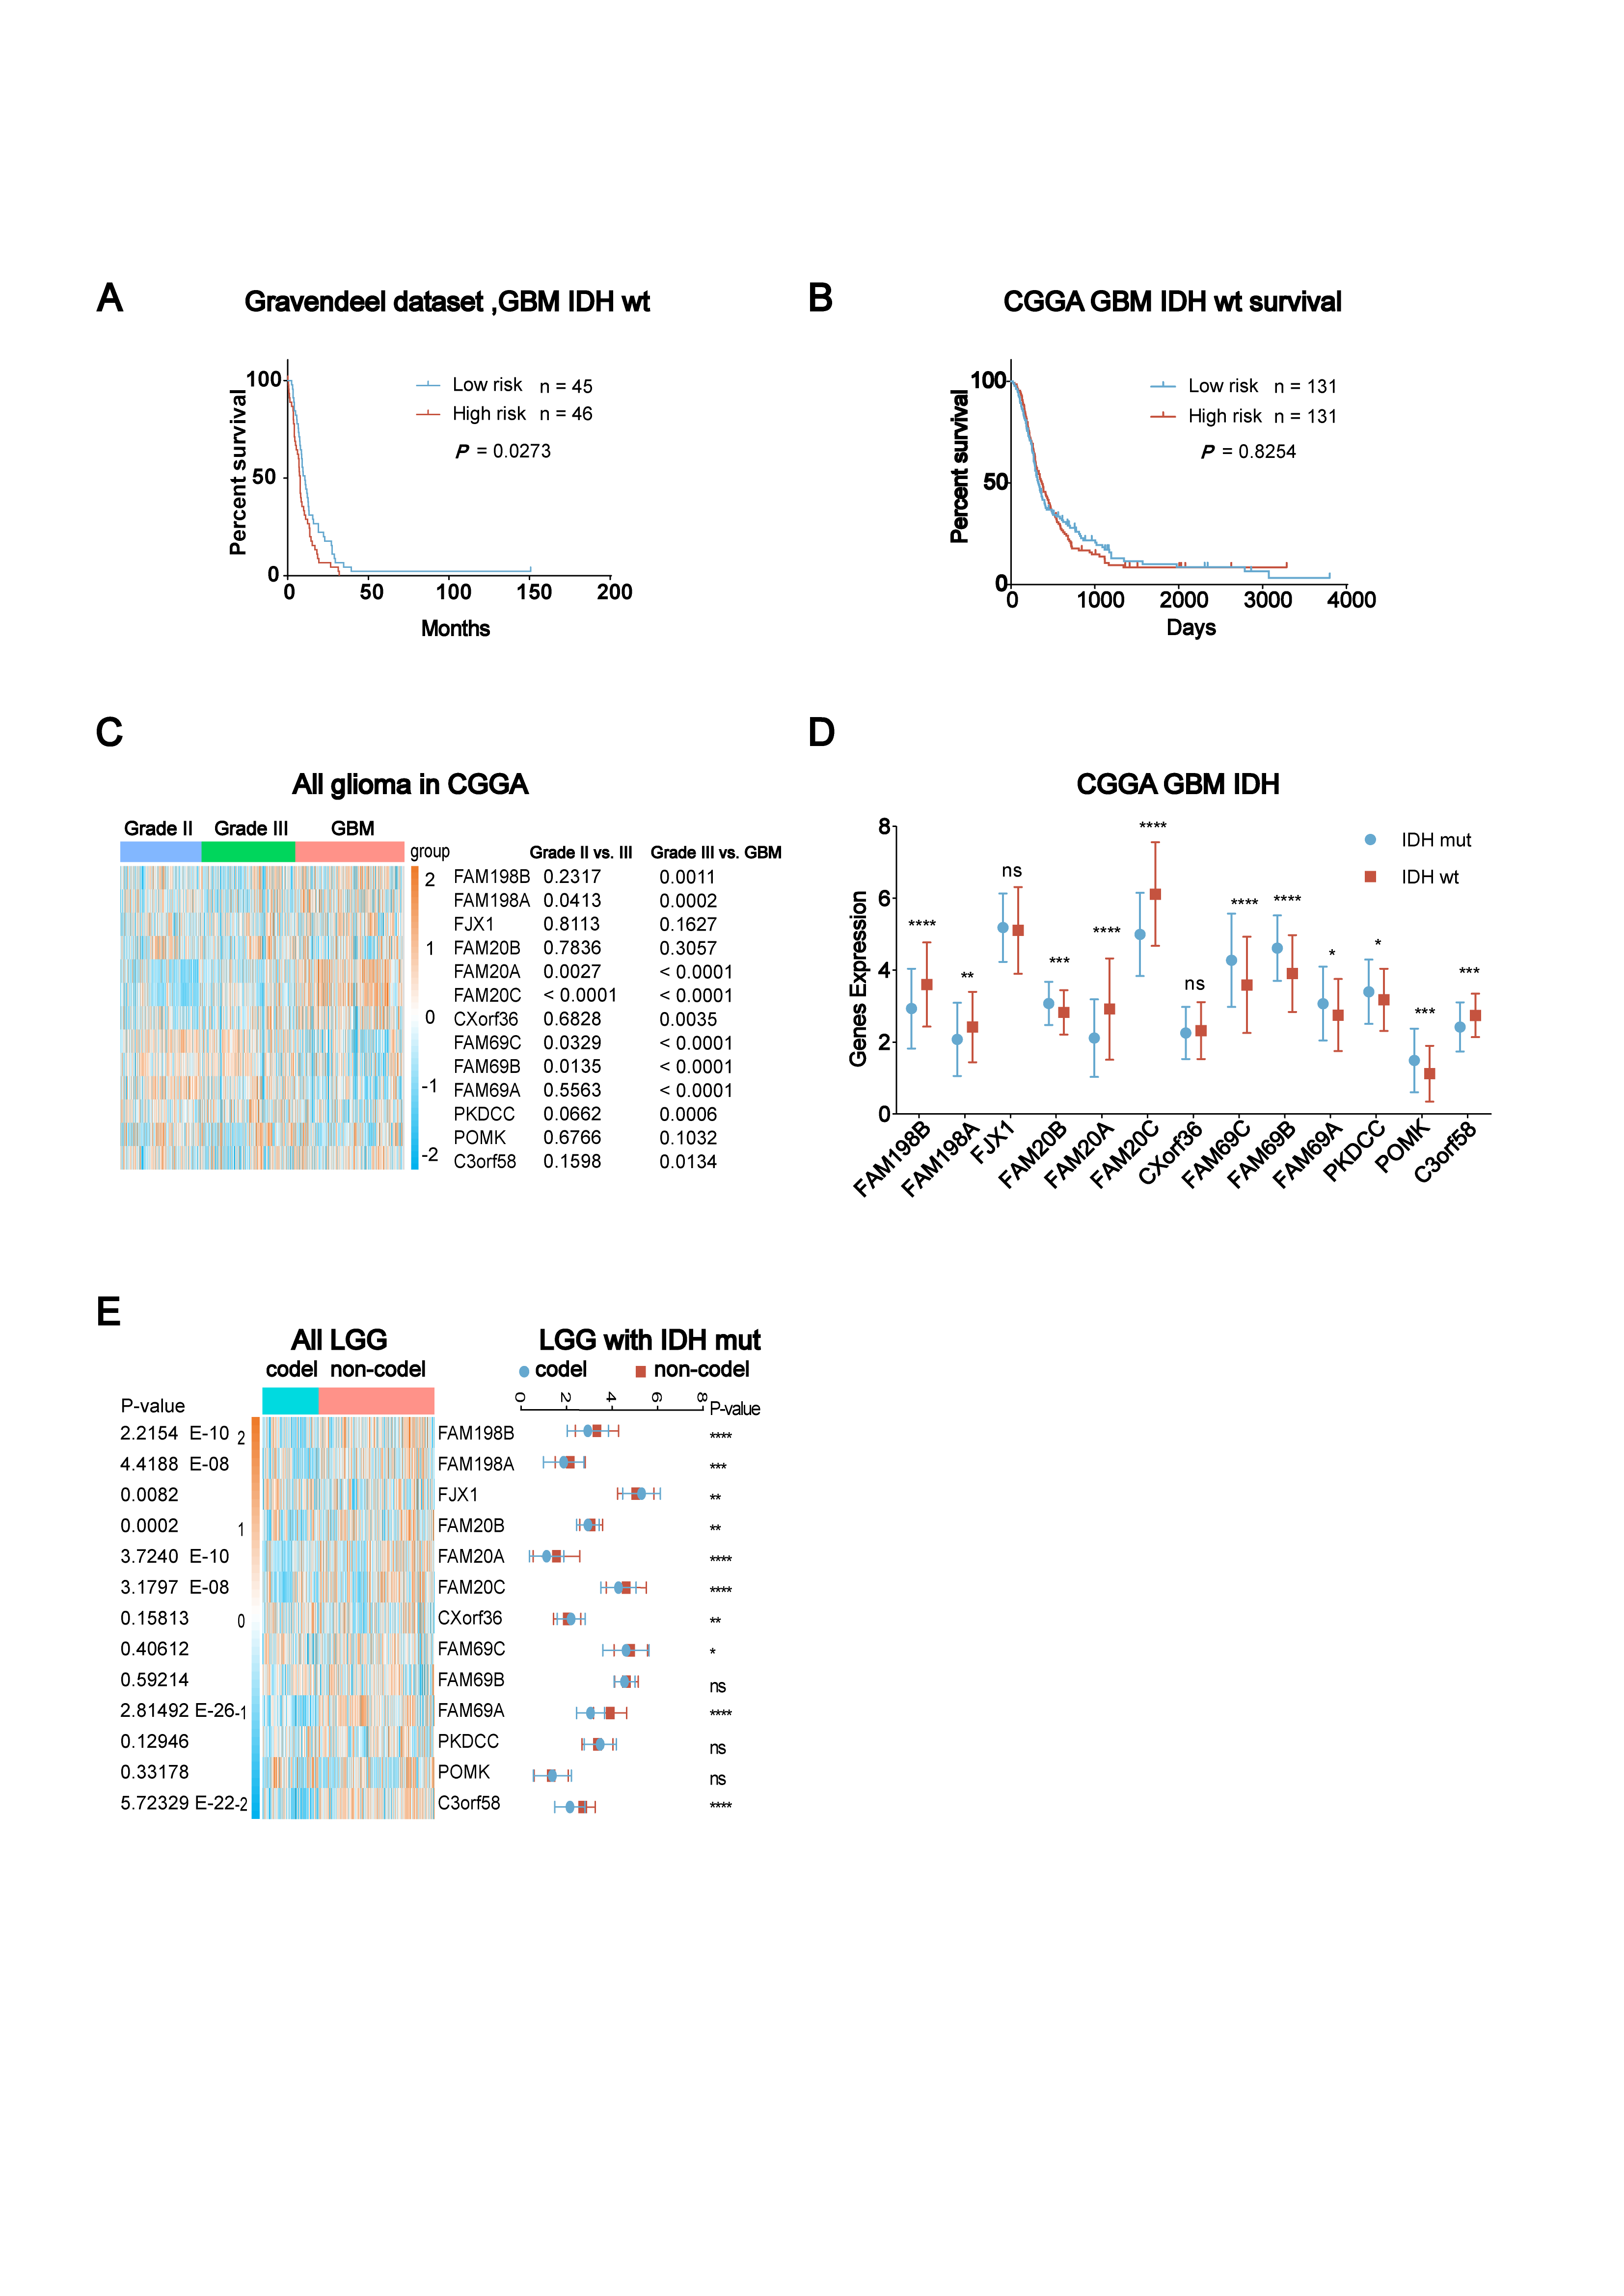
**

**Supplementary Fig. S1, related to Fig. 1**

**The development of secretory pathway related gene signature stratifies the *IDH* wild type (wt) GBM as two groups with distinct survival.**

A-B. Kaplan–Meier curves describing the survival of *IDH* wt GBM in low- and high-risk groups defined by secretory pathway related gene signature. (A, Gravendeel dataset, GSE16011: GBM *IDH* wt low risk: n = 45, high risk: n = 46; B, CGGA GBM *IDH* wt, low risk: n = 131, high risk: n = 131, log-rank test).

C. The analysis of 13 secretory pathway related gene expression in different grades of glioma (CGGA glioma RNA-seq dataset: grade II: n = 290, grade III: n = 334, GBM: n = 388, one-way ANOVA).

D. The expression analysis of 13 secretory pathway related genes in GBM with different *IDH* status (CGGA GBM RNA-seq dataset: *IDH* mut: n = 90, *IDH* wt: n = 288, *t* test)

E. The analysis of 13 secretory pathway related gene expression in all of low-grade gliomas (left panel, LGG 1p19q codel: n = 191; LGG 1p19q non-codel: n = 393) and *IDH*-mutant (mut) LGG with different 1p/19q codeletion (codel) status in CGGA (right panel, LGG with *IDH* mut and 1p19q codel: n = 166; LGG with *IDH* mut and 1p19q non-codel: n = 246, *t* test).

(ns *P* > 0.05, ***** *P* < 0.05, ****** *P* < 0.01, ******* *P* < 0.001, and ******** *P* < 0.0001)

**
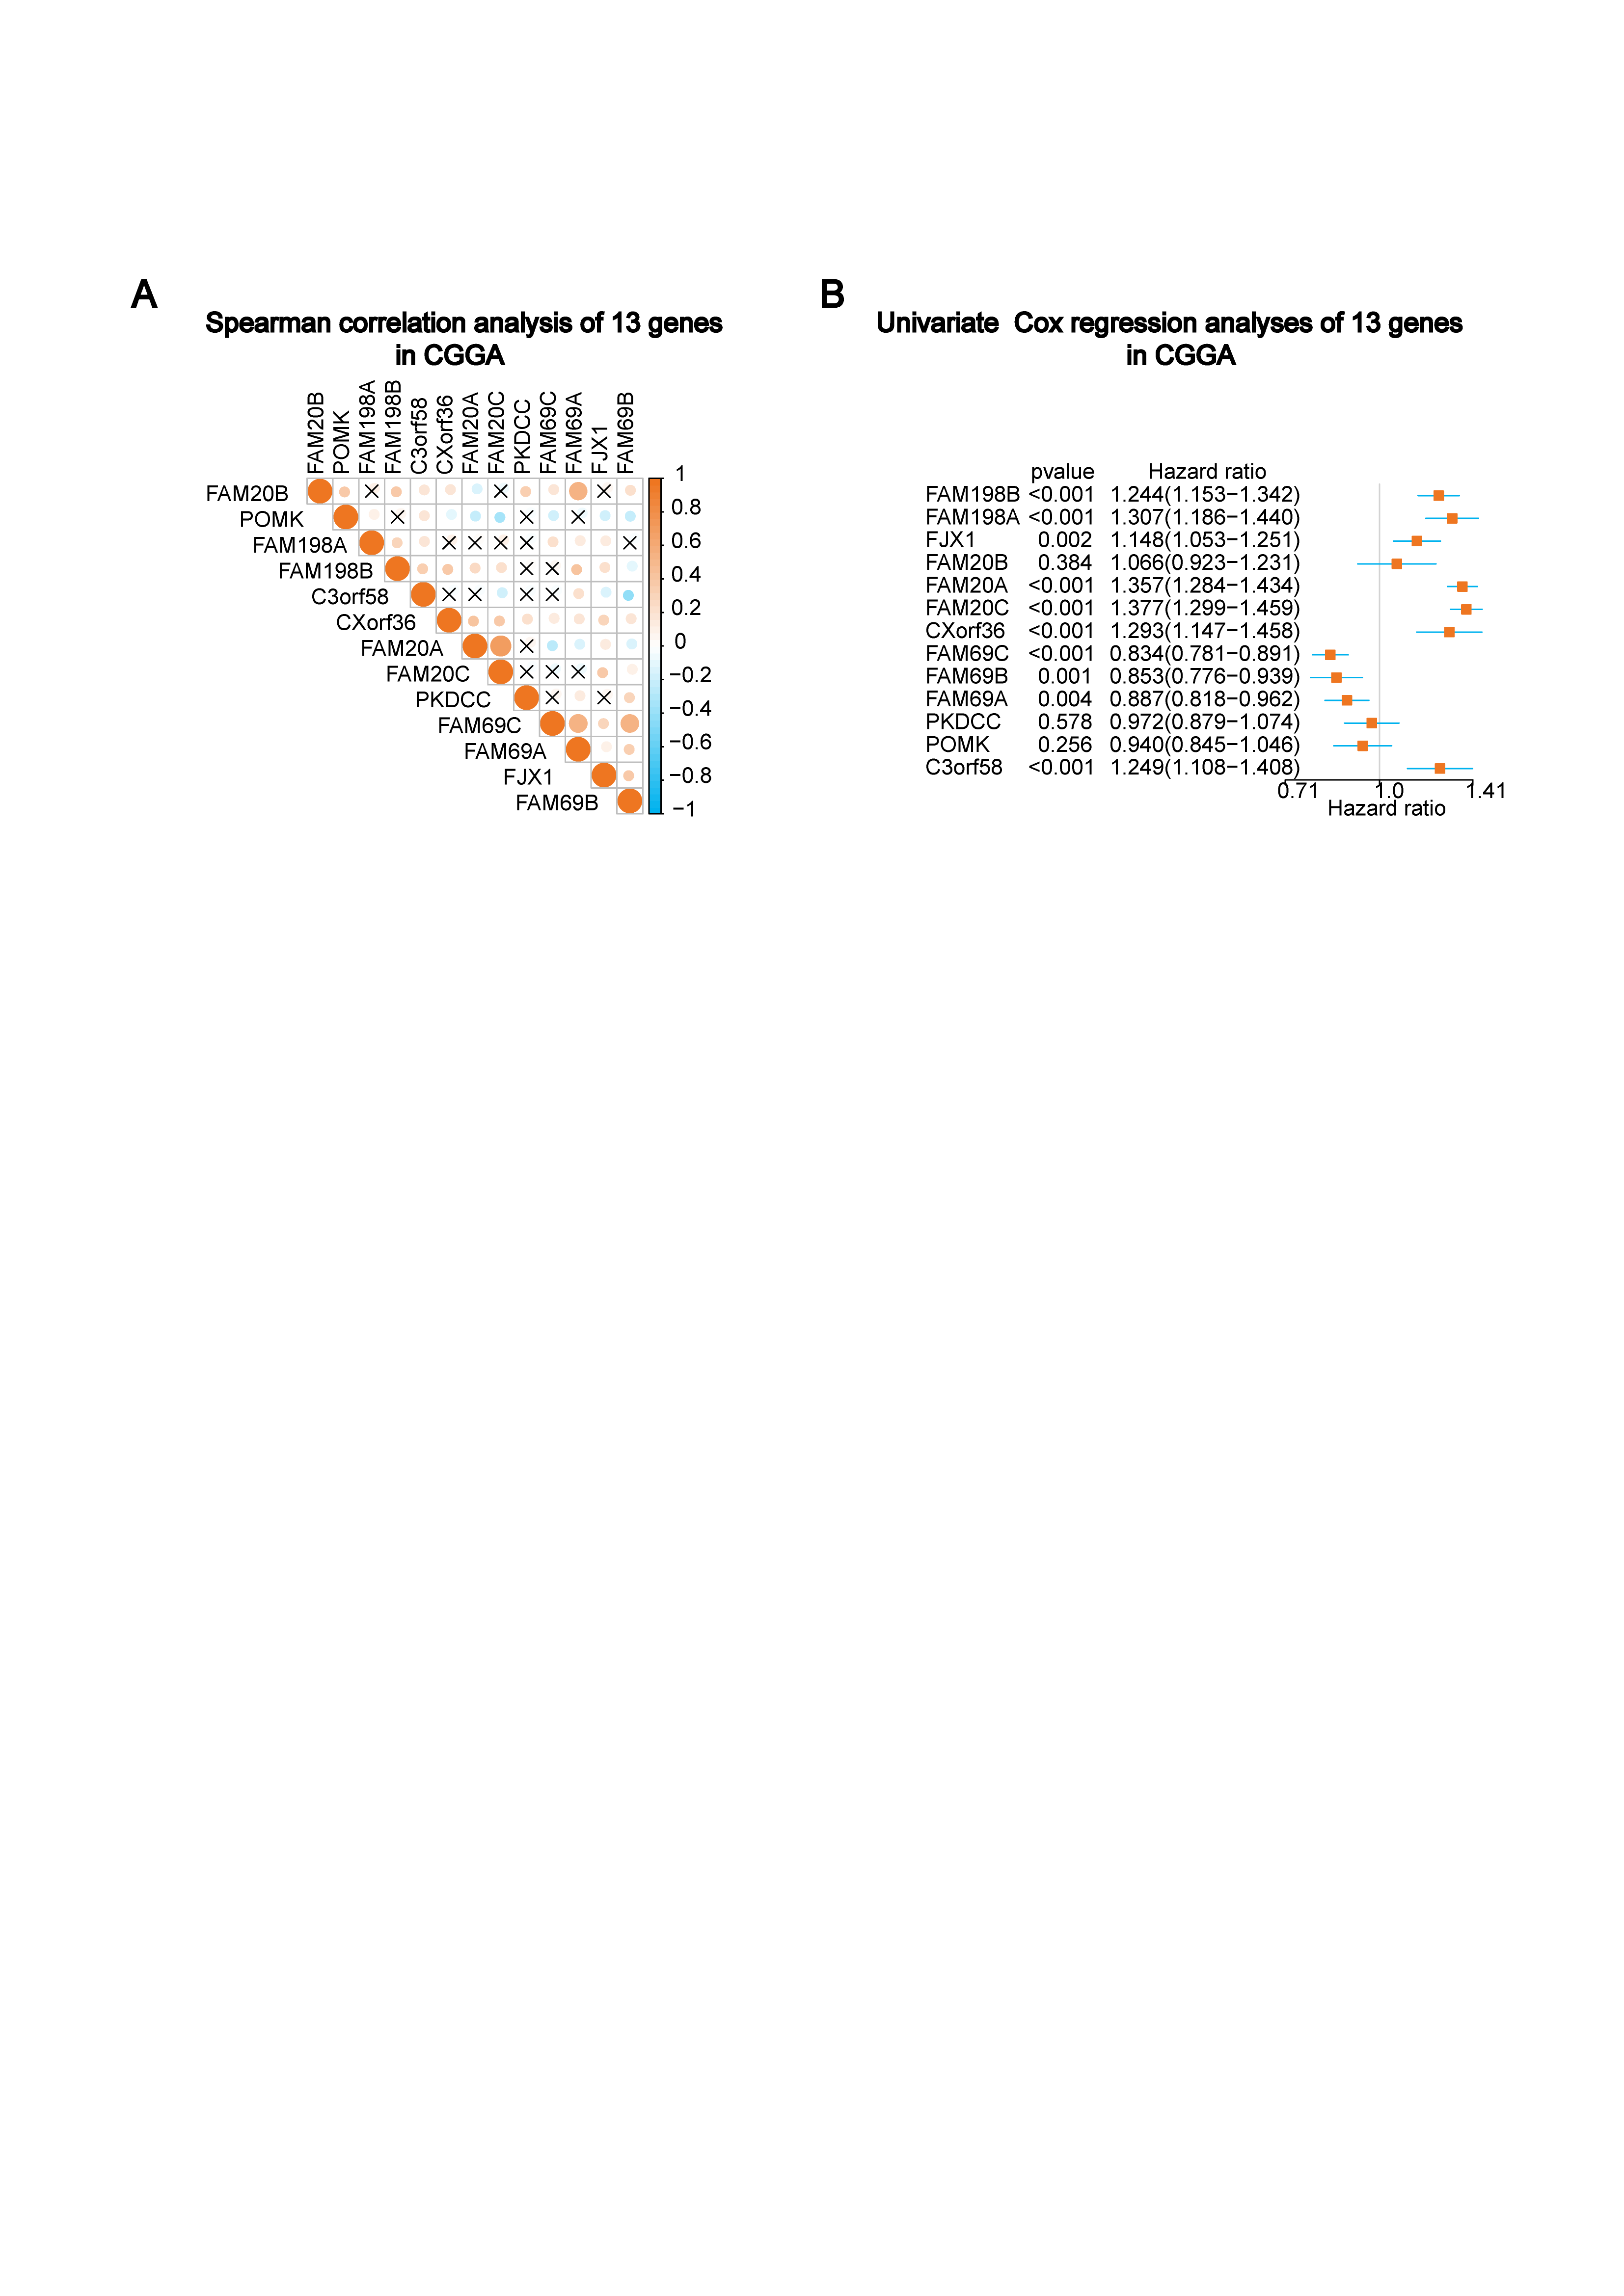
**

**Supplementary Fig. S2, related to Fig. 2**

**Transcriptomic analyses with CGGA confirms the crucial role of *FAM20C* in secretory pathway related gene family in glioma**

A-B. Spearman correlation (A, the circle size represents correlation strength, and the color represents the positive(orange) or negative(blue) correlation) and the univariate Cox regression analysis (B) of 13 secretory pathway related genes in CGGA glioma RNA-seq dataset.

**
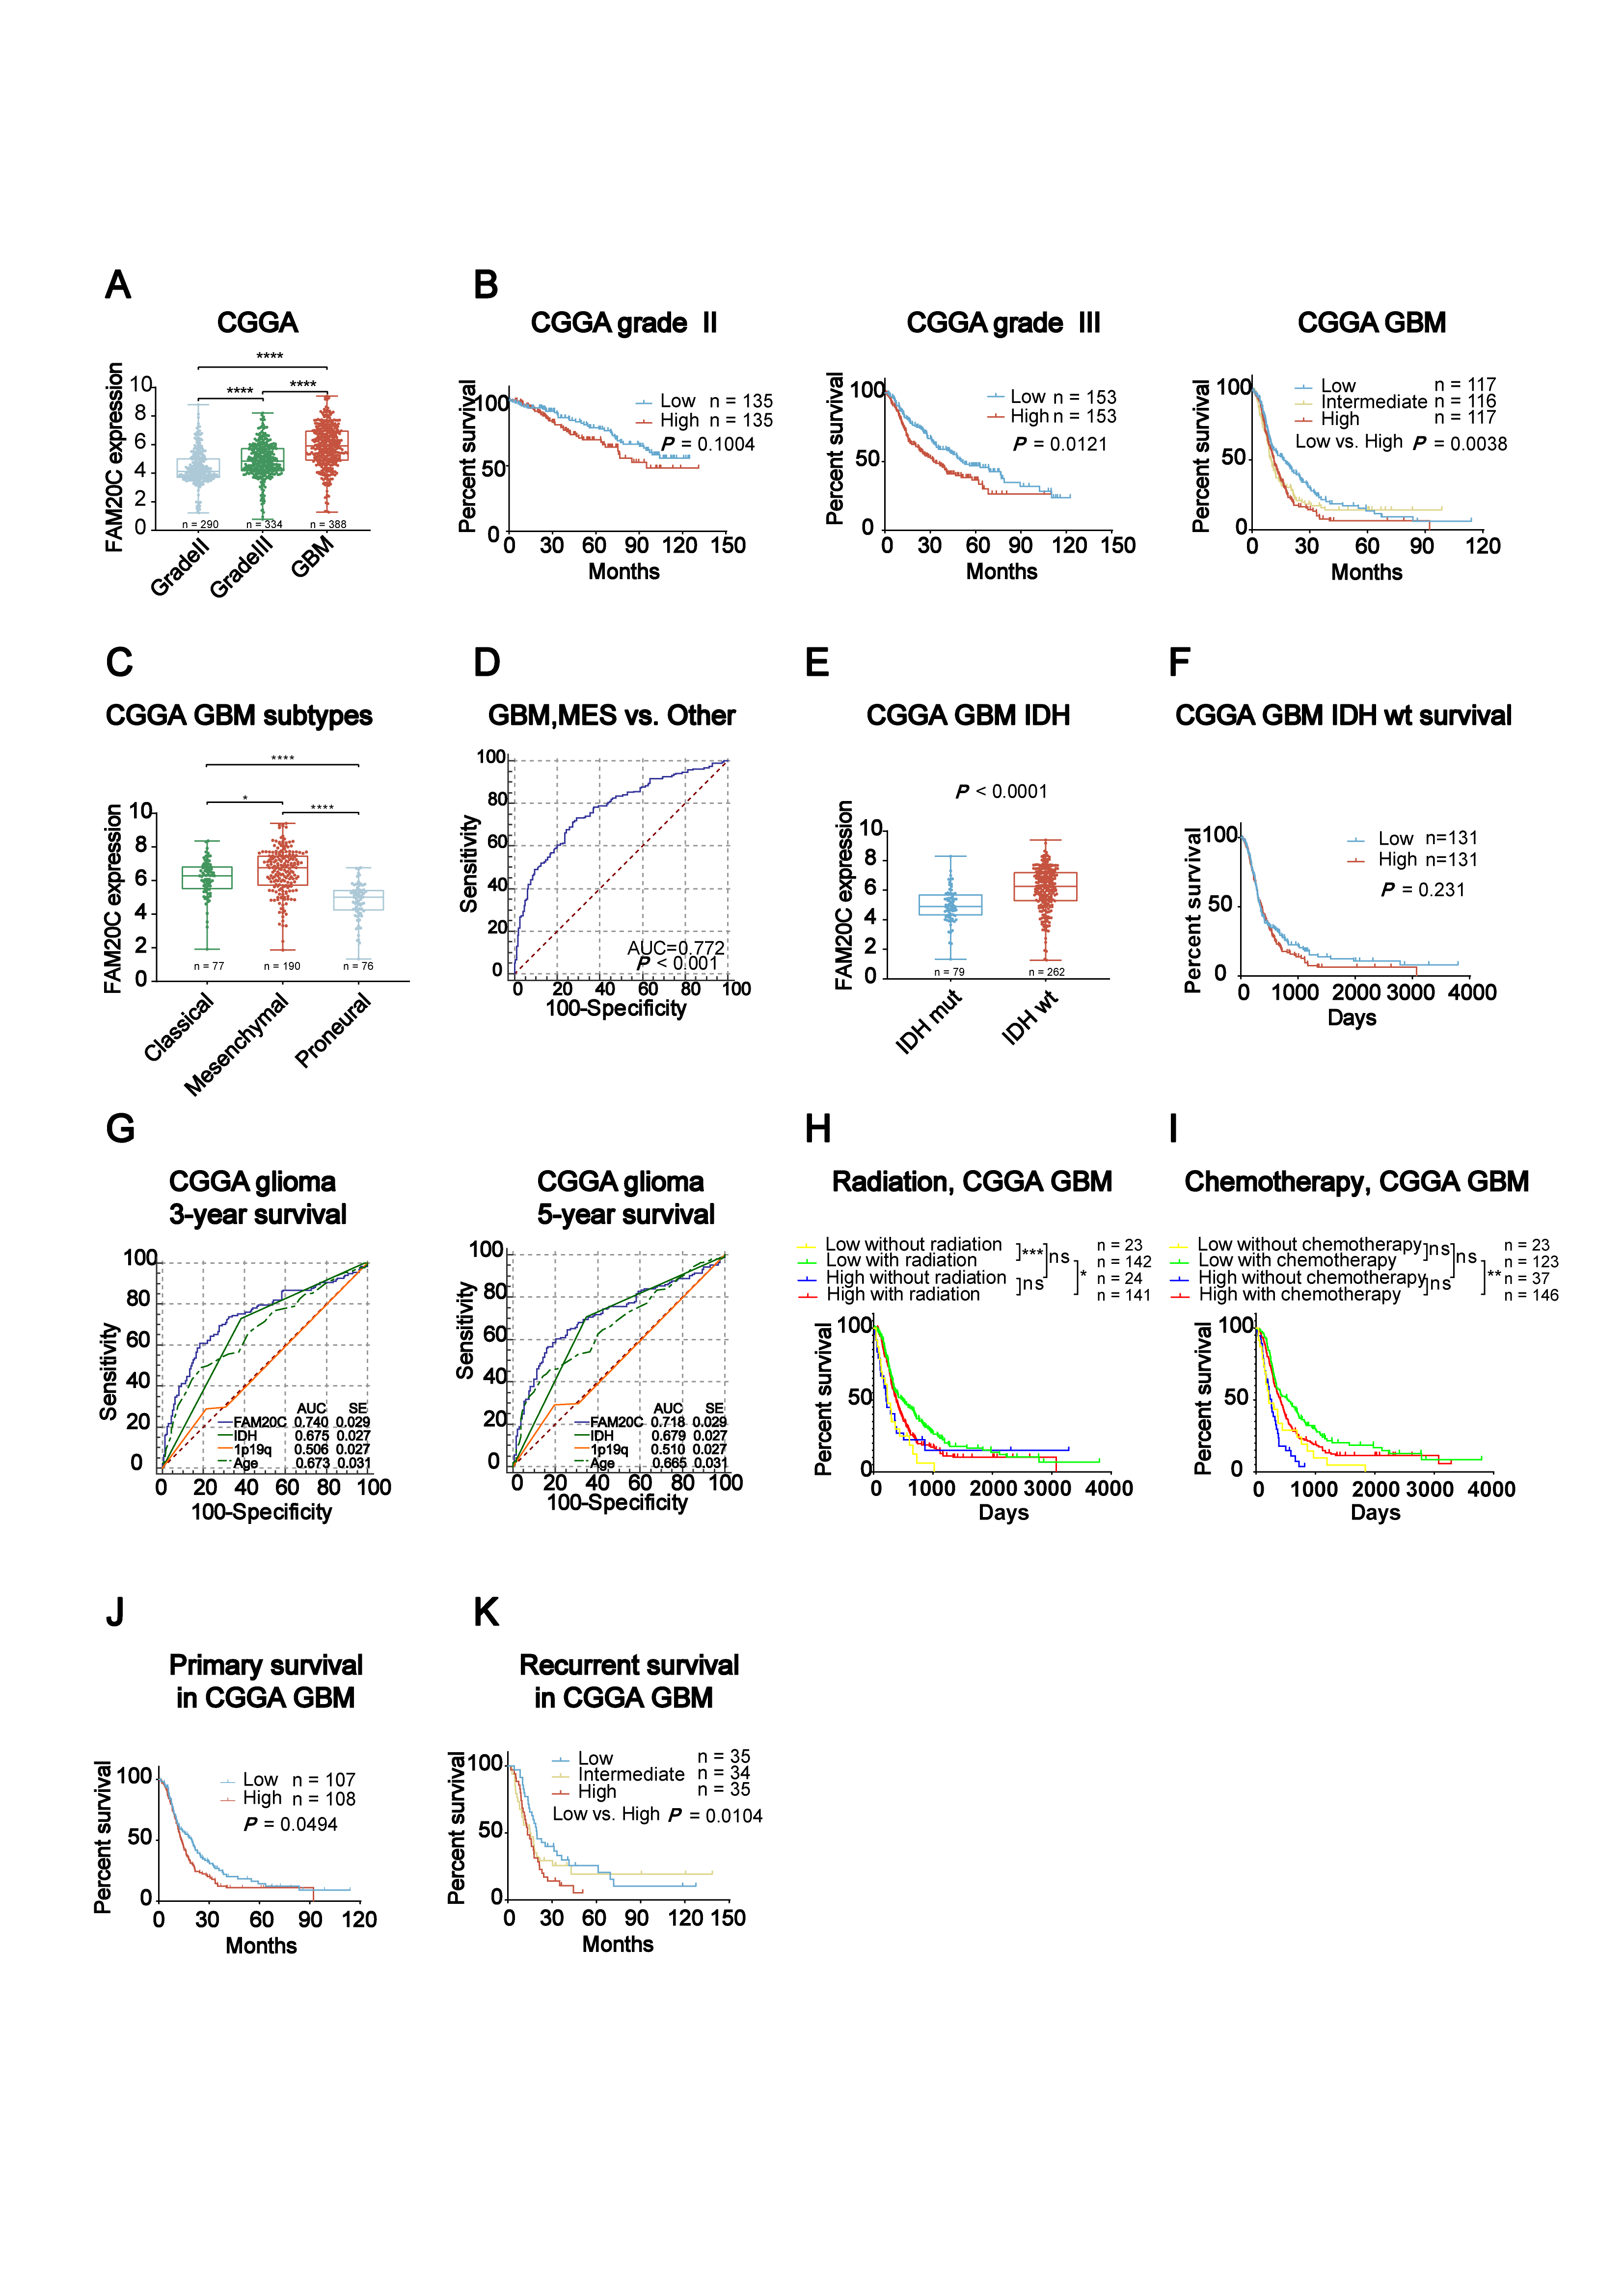
**

**Supplementary Fig. S3, related to Fig. 3**

**The analyses of CGGA identifies the association of *FAM20C* with the progressive malignancy and poor survival in glioma.**

A. The analyses of *FAM20C* expression in different grades of gliomas (CGGA glioma RNA-seq: grade II: n = 290; grade III: n = 334; GBM: n = 388, one-way ANOVA).

B. Kaplan‐Meier curves describing the association between *FAM20C* expression and the survival of different grade glioma in CGGA (left panel: grade II, low n = 135, high n = 135, *P* = 0.1004; middle panel: grade III, low n = 153, high n = 153, *P* = 0.0121; right panel: GBM, low n = 178, high n = 172, *P* = 0.0230, log-rank test).

C. The analyses of *FAM20C* expression in different GBM subtypes (CGGA GBM RNA-seq: classical n = 77; mesenchymal n = 190; proneural n = 76, one-way ANOVA)

D. The receiver operator characteristic (ROC) curve describing the sensitivity and specificity of *FAM20C* as a marker for mesenchymal vs. other subtypes in GBM (CGGA, classical n = 77; mesenchymal n = 190; proneural n = 76).

E. The analysis of *FAM20C* expression in GBM with different *IDH* status (CGGA GBM RNA-seq: *IDH* mut, n = 79; *IDH* wt, n = 262, *P* < 0.0001, *t* test).

F. Kaplan‐Meier curve describing the association between *FAM20C* expression and the survival of GBM *IDH* wt patients (CGGA GBM *IDH* wt, low risk: n = 131, high risk: n = 131, log-rank test).

G. The ROC curves comparing the sensitivity and specificity of *FAM20C* as a prognostic marker for glioma patients in CGGA (left panel: 3‐year; right: 5‐year).

H-I. Kaplan–Meier curves showing the association between *FAM20C* expression and GBM patients’ survival with or without radiation (H) or chemotherapy (I) (CGGA GBM RNA-seq: H, low without radiation n = 23, low with radiation n = 142; high without radiation n = 24, high with radiation n = 141; I, low without chemotherapy n = 23, low with chemotherapy n = 123, high without chemotherapy n = 37, high with chemotherapy n = 146, log-rank test).

J-K. Kaplan‐Meier analyses of *FAM20C* in primary (J, low n = 107, high n = 108, *P* = 0.0494) and recurrent (K, low n = 35, intermediate n = 34, high n = 35, *P* = 0.0104) GBM (CGGA GBM RNA-seq, log-rank test).

(ns *P* > 0.05, ***** *P* < 0.05, ****** *P* < 0.01, and ******** *P* < 0.0001)

**
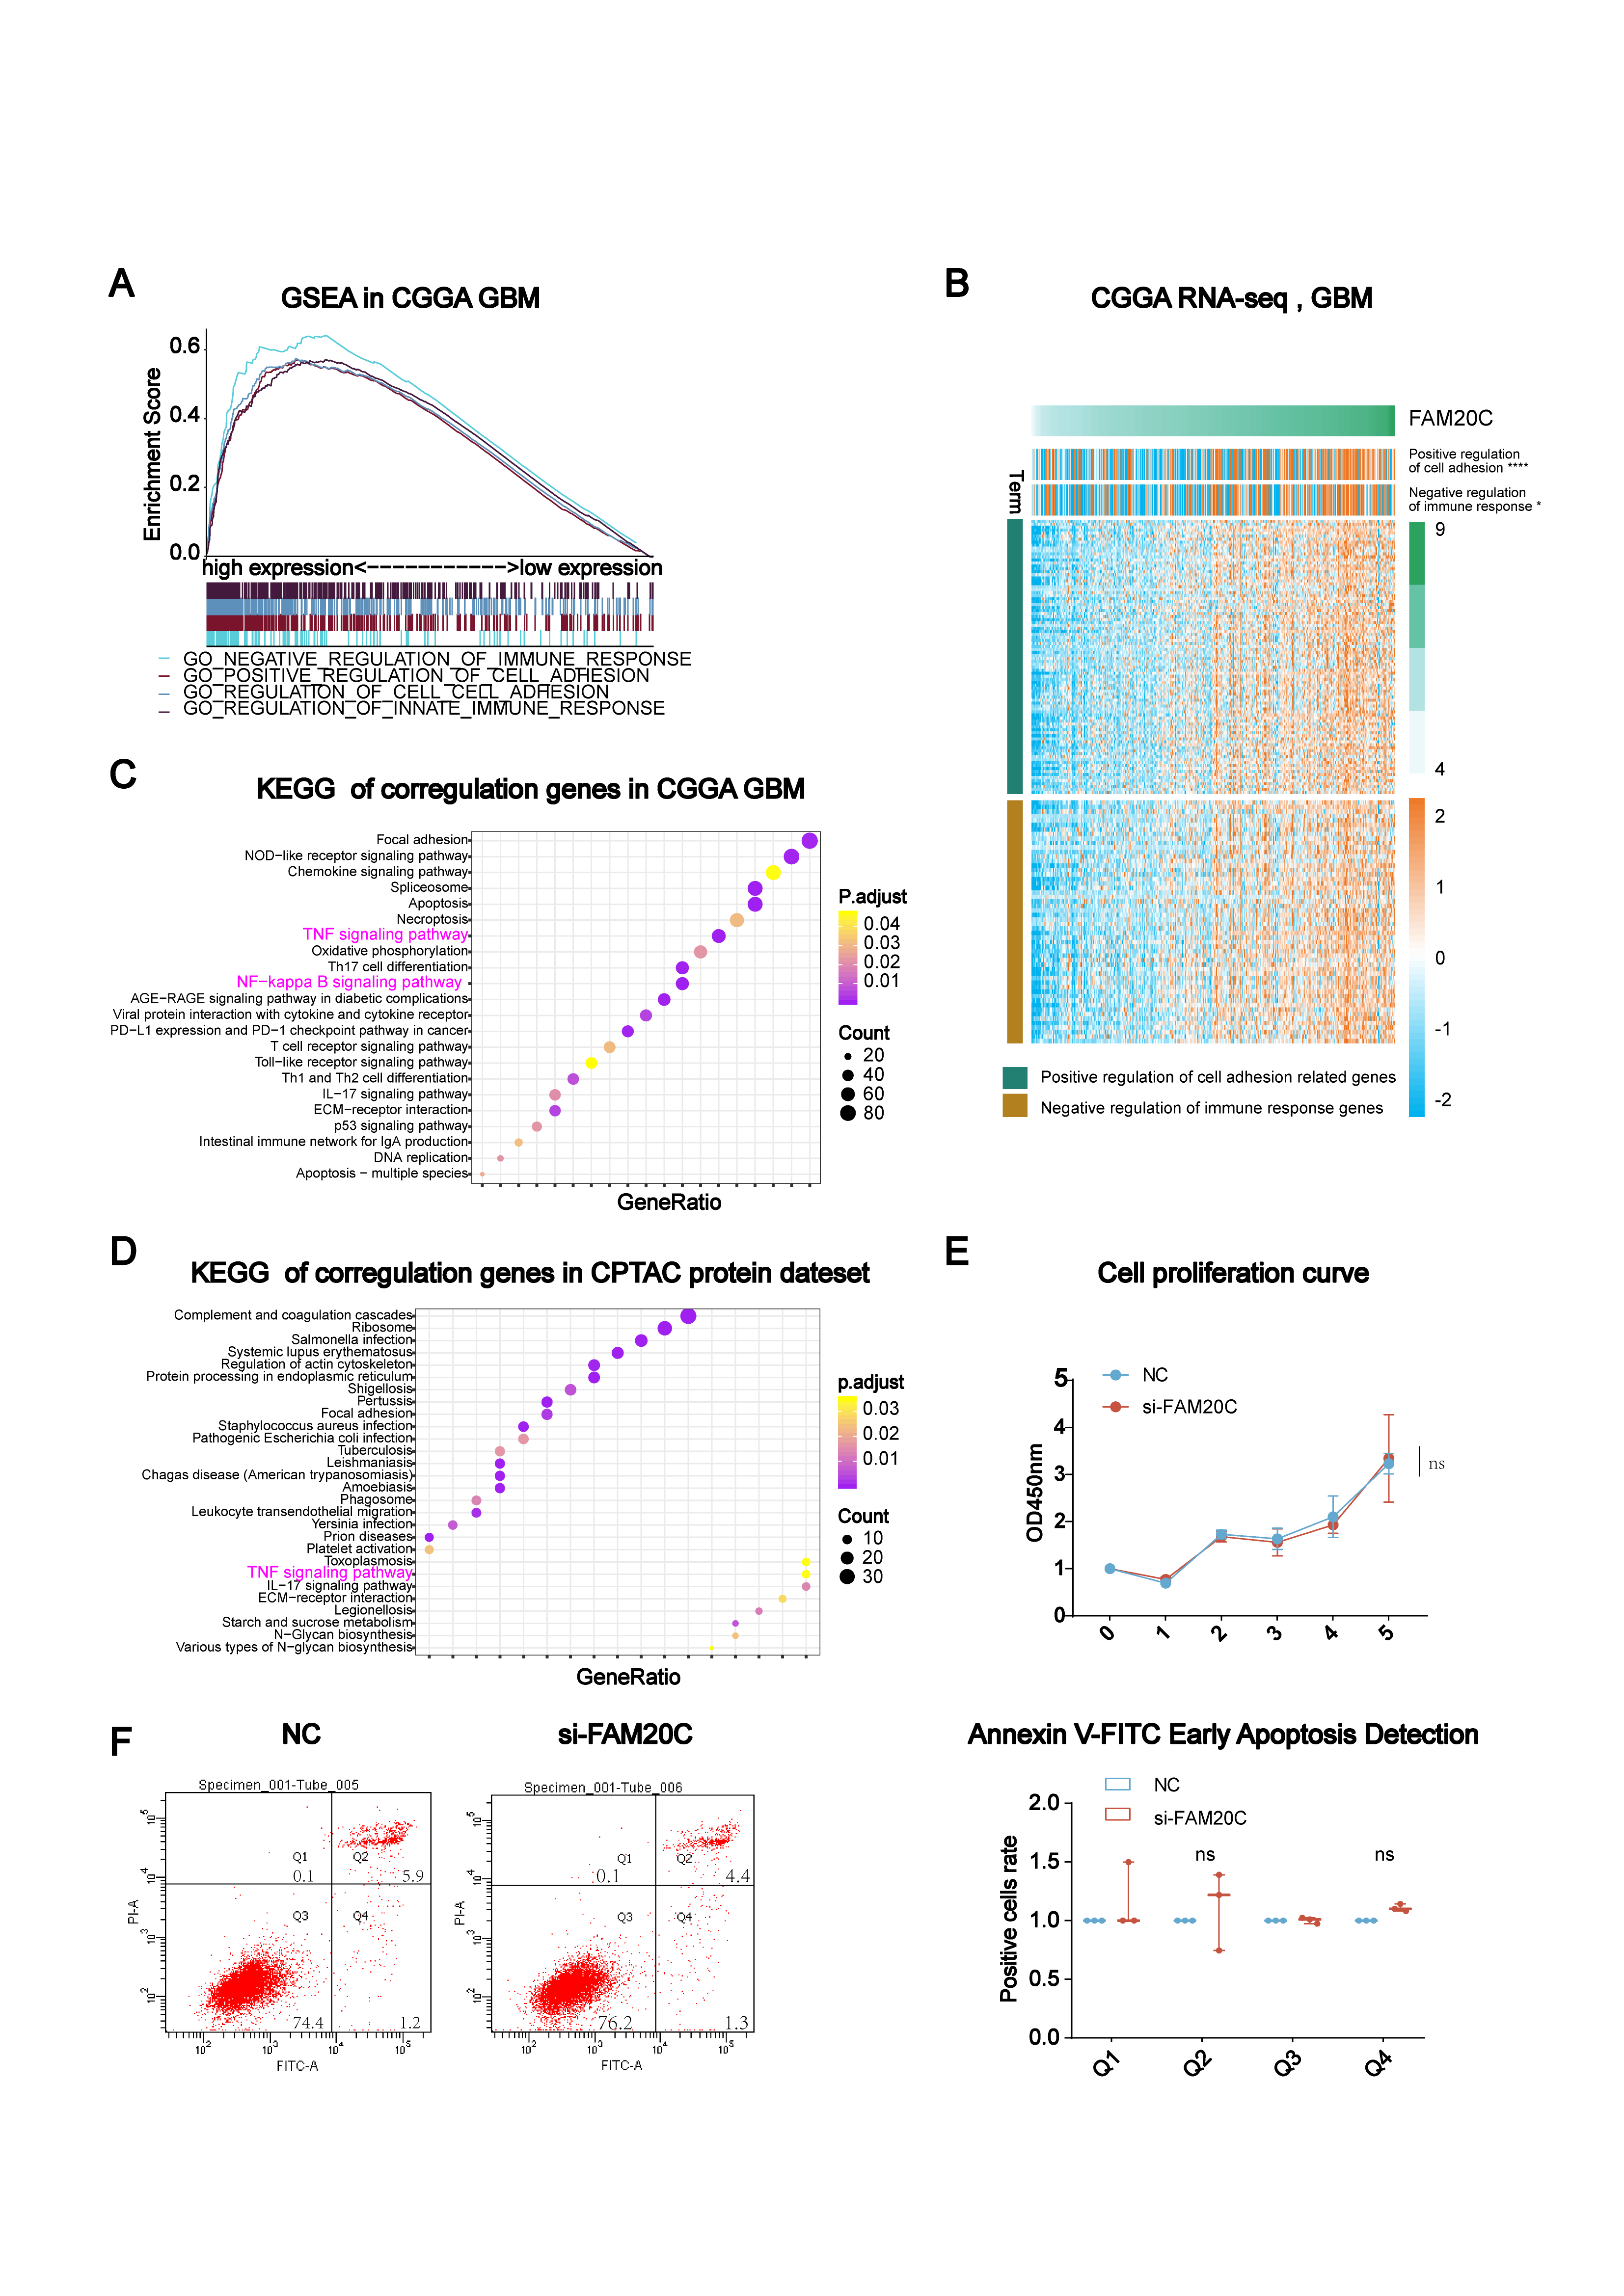
**

**Supplementary Fig. S4, related to Fig. 4**

***FAM20C* knockdown doesn’t significantly affect the growth and apoptosis of glioma cells.**

A. GSEA disclosed a significant enrichment of immune response and cell adhesion-related phenotypes in CGGA GBM patients with high level of *FAM20C* expression.

B. Heat maps describing the correlation between FAM20C expression and cell adhesion and negative immune regulation‐related genes in TCGA GBM dataset (Chi-square test).

C. KEGG analysis was performed on genes with a correlation coefficient greater than 0.3 (Pearson analysis) with *FAM20C* in CGGA GBM RNA-seq dataset.

D. KEGG analysis was performed on genes with a correlation coefficient greater than 0.5 (Pearson analysis) with FAM20C in CPTAC database.

E. The in vitro proliferation assay by MTT method demonstrated that knock-down *FAM20C* didn’t significant inhibit the growth of glioma cells. (n = 3, *t* test)

F. FACS showing knock-down *FAM20C* didn’t significantly induce the apoptosis of glioma cells (n = 3, *t* test)

(ns *P* > 0.05, ***** *P* < 0.05, ****** *P* < 0.01, and ******** *P* < 0.0001)

**
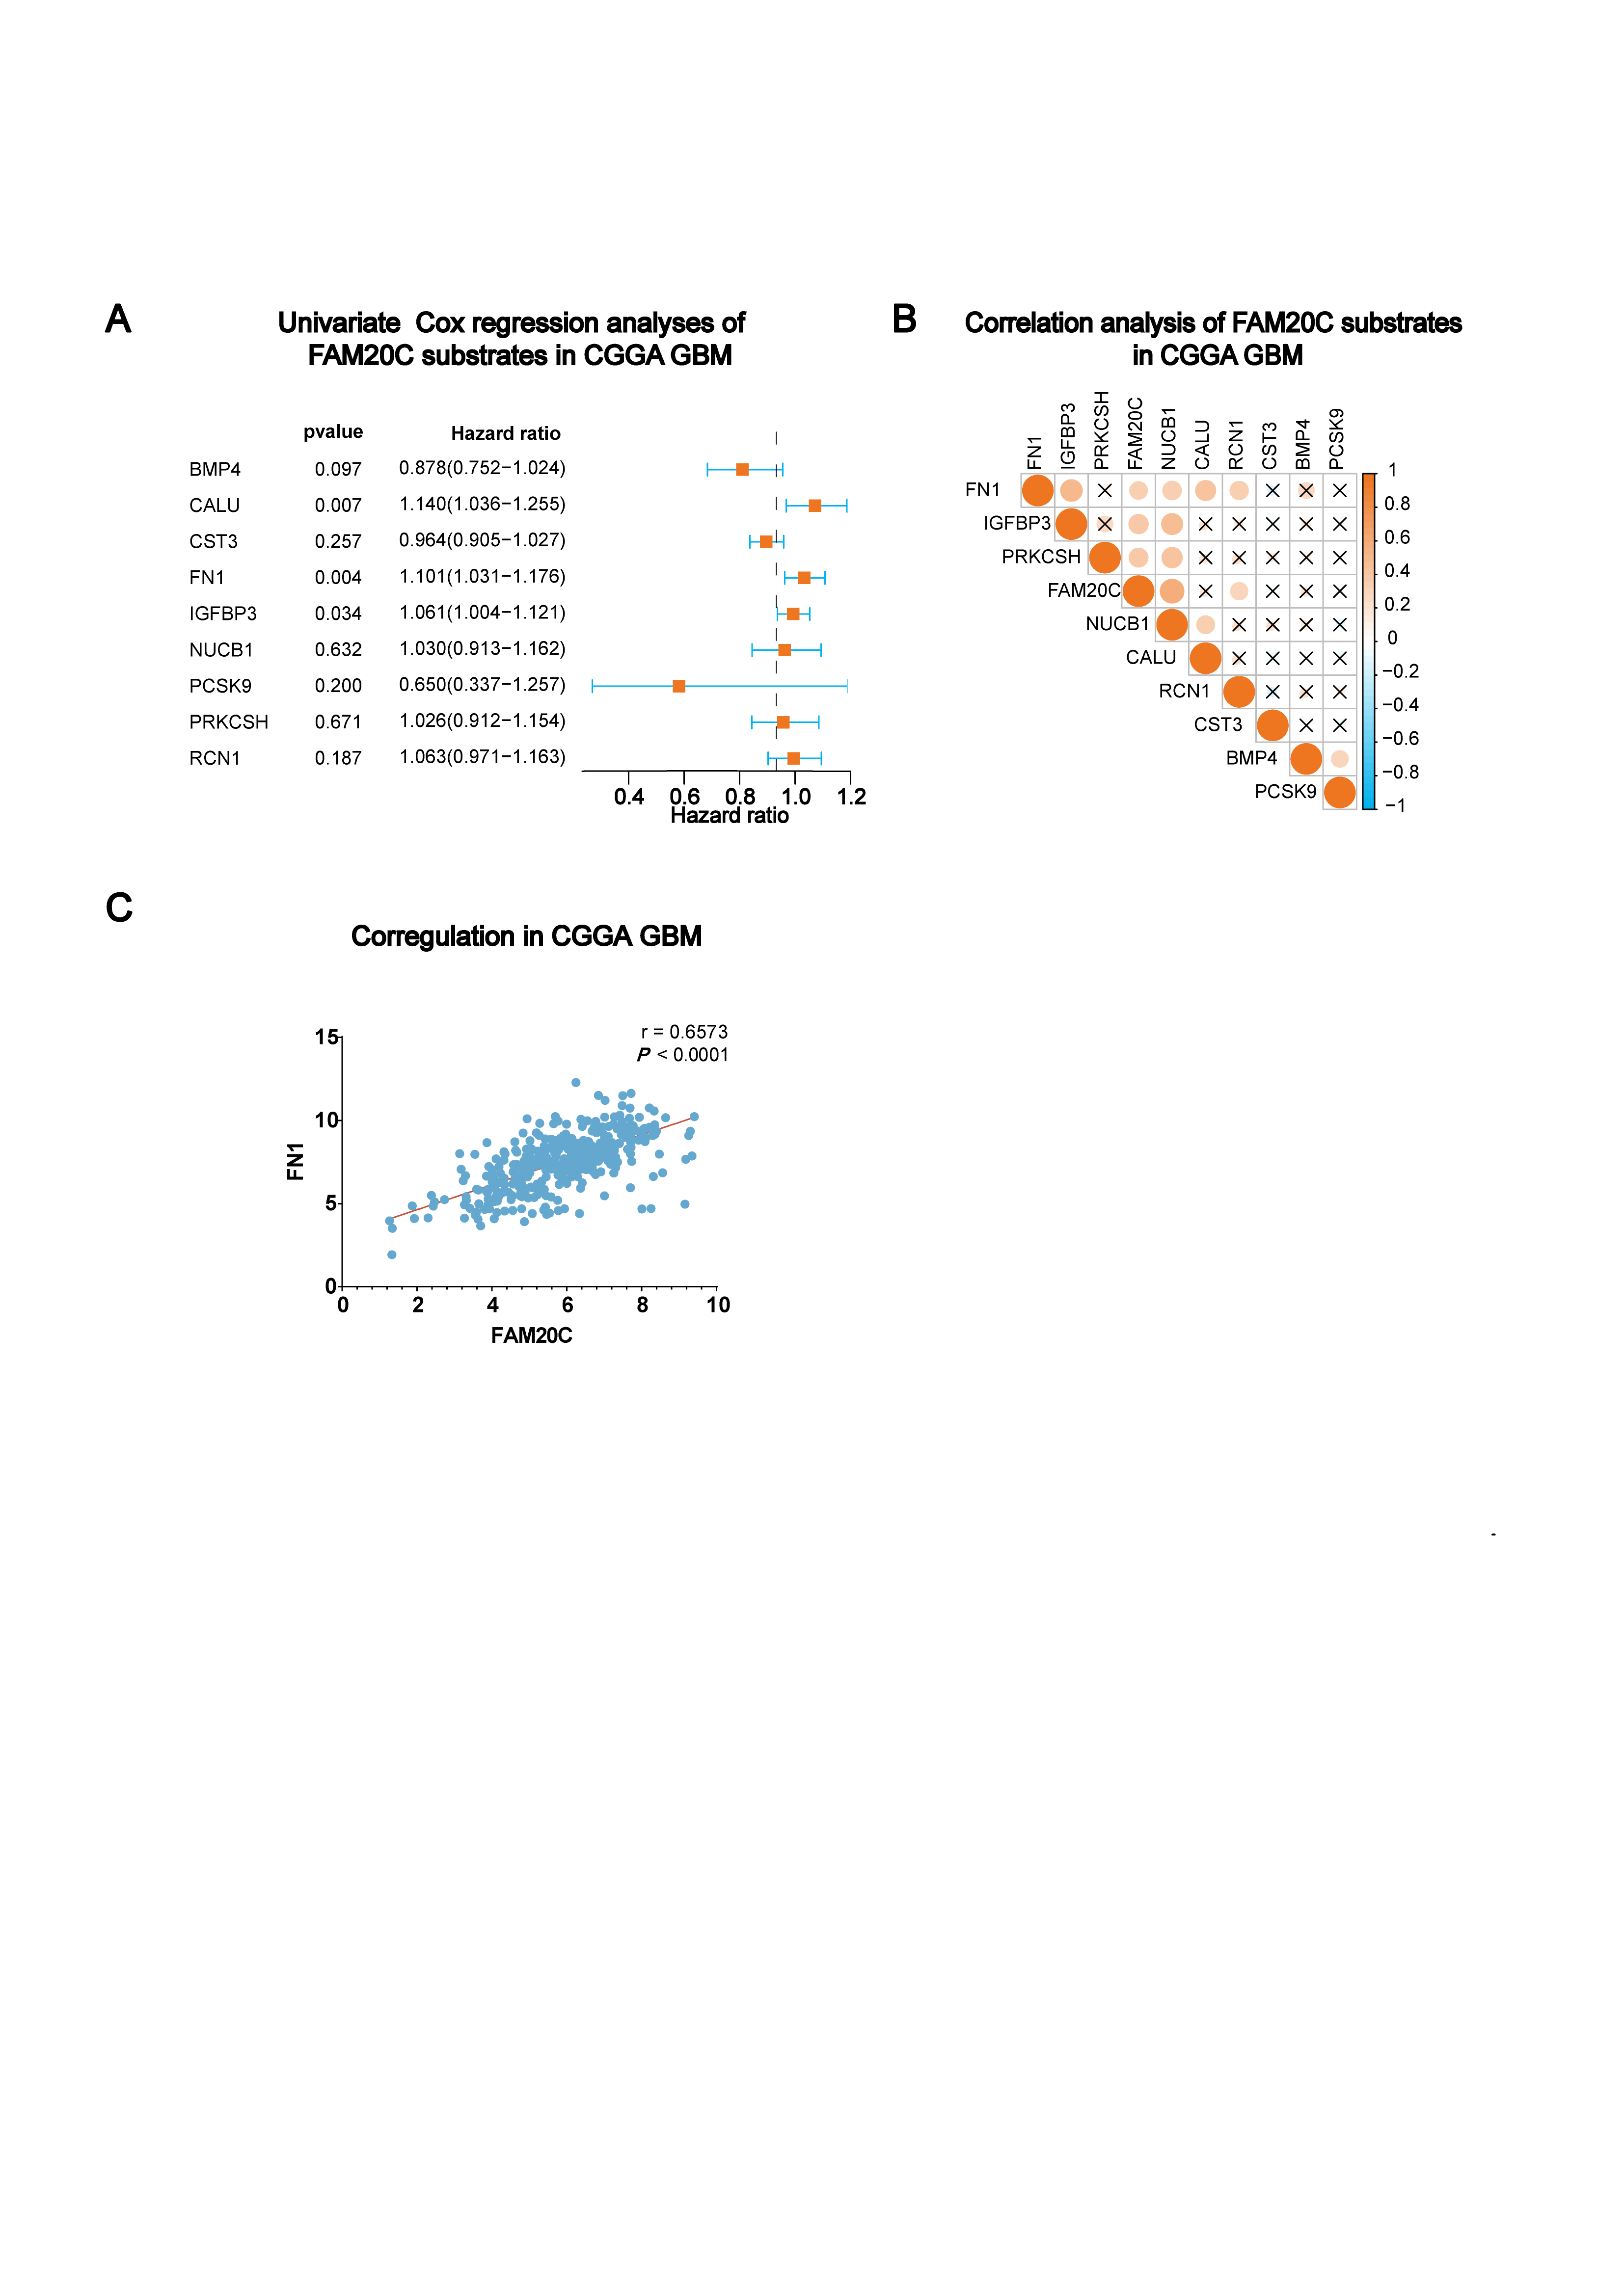
**

**Supplementary Fig. S5, related to Fig. 5**

**The screening of *FAM20C* substrates in GBM distinguishes FN1 as the key substrate interacting with it.**

A. The univariate Cox regression analyses of *FAM20C* substrates in CGGA datasets.

B. Pearson correlation analysis between *FAM20C* and its substrates (CGGA GBM RNA-seq: circle size represents the correlation strength, and color represents the positive (orange) or negative (blue) correlation.

C. Pearson correlation analysis between *FAM20C* and FN1 in CGGA GBM RNA-seq dataset.

**
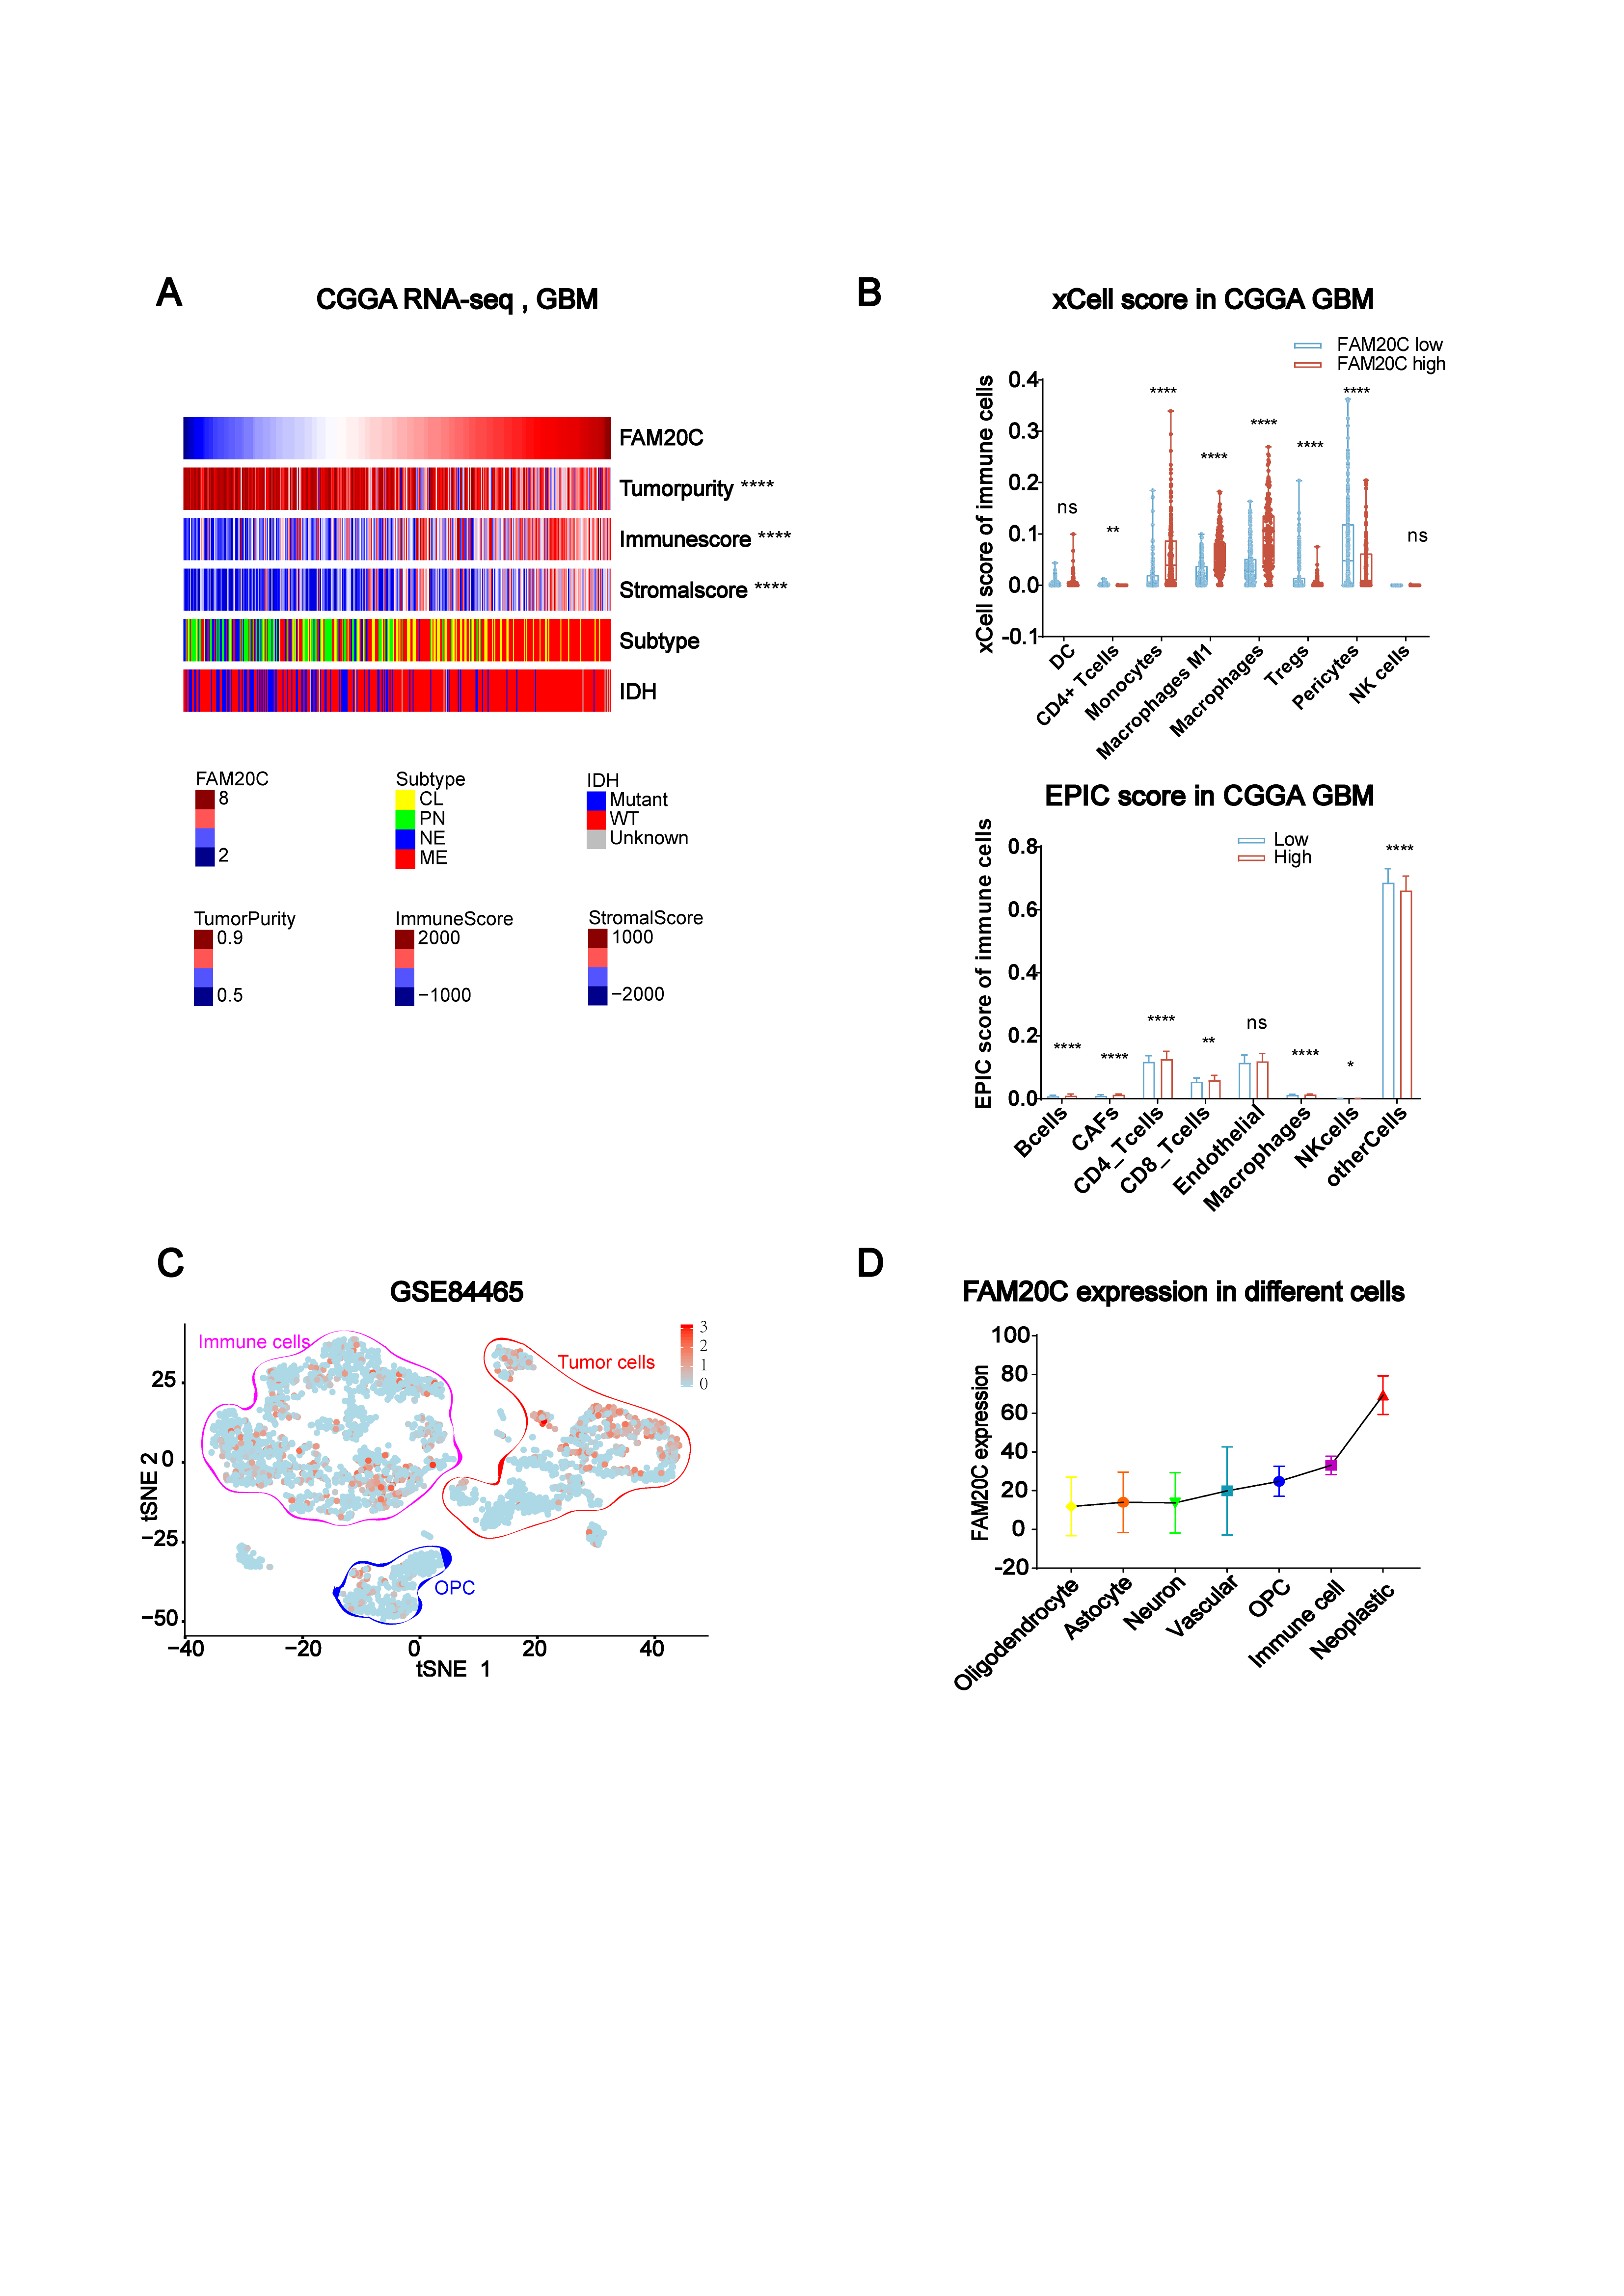
**

**Supplementary Fig. S6 related to Fig. 6**

**The analyses of *FAM20C* expression in CGGA identified an enrichment of cell adhesion- and negative regulation of immune response-related phenotypes in GBM with high level of *FAM20C* expression.**

A. Heat maps describing the expression of *FAM20C* negatively correlated with tumor purity, and positively correlated with immune score and stromal score in GBM (CGGA GBM RNA-seq: n = 388, Pearson correlation analysis).

B. The analyses of xCELL (upper panel) and EPIC score (lower panel) indicating *FAM20C* expression pattern in indicated cell subpopulations (CGGA GBM RNA-seq, *t* test).

C-D. t-SNE map color-coded for transcript counts (C) and the corresponding single-cell bar plots (D) of *FAM20C* enriched in different cell subsets of GBM (GSE84465 dataset).

**Supplementary Tables**

**Table S1** The list of secretory pathway related genes.

| Gene name | Remarks |
| --- | --- |
| *FAM198B* | golgi associated kinase 1B, also known as: GASK1B; ENED; AD021; AD036; C4orf18 |
| *FAM198A* | golgi associated kinase 1A, also known as: GASK1A, C3orf41 |
| *FJX1* | four-jointed box kinase 1 |
| *FAM20B* | FAM20B glycosaminoglycan xylosylkinase, also known as: gxk1 |
| *FAM20A* | FAM20A golgi associated secretory pathway pseudokinase, also known as: AI1G, AIGFS, FP2747 |
| *FAM20C* | FAM20C golgi associated secretory pathway kinase, also known as: DMP-4, DMP4, G-CK, GEF-CK, RNS |
| *CXorf36* | divergent protein kinase domain 2B, also known as: DIA1R; DIPK2B; PRO3743; EPQL1862; bA435K1.1; 4930578C19Rik |
| *FAM69C* | divergent protein kinase domain 1C, also known as DIPK1C; C18orf51 |
| *FAM69B* | divergent protein kinase domain 1B, also known as DIPK1B; pp6977; C9orf136 |
| *FAM69A* | divergent protein kinase domain 1A, also known as: DIPK1A |
| *PKDCC* | protein kinase domain containing, cytoplasmic，also known as: RLSDF, SGK493, Vlk |
| *POMK* | protein O-mannose kinase, also known as: MDDGA12, MDDGC12, SGK196 |
| *C3orf58* | divergent protein kinase domain 2A, also known as: DIA1; HASF; GoPro49 |

**Table S2** The GBM patients’ information.

| Sample NO. | Gender | Age | Chemotherapy | Clinical status | GIS score |
| --- | --- | --- | --- | --- | --- |
| G40222 | M | 71 | NA | Primary | 6 |
| G40226 | M | 40 | No | Primary | 4 |
| G40227 | M | 72 | No | Primary | 6 |
| G4031402 | F | 52 | No | Primary | 8 |
| G40408 | F | 58 | No | Primary | 3 |
| G40518 | F | 68 | NA | Primary | 12 |
| G40521 | F | 73 | NA | Primary | 2 |
| G40618 | M | 44 | No | Primary | 9 |
| G40620 | F | 54 | NA | Primary | 4 |
| G40729 | M | 63 | No | Primary | 9 |
| G40802 | M | 35 | Yes | Primary | 6 |
| G40805 | M | 42 | NA | Primary | 2 |
| G4080902 | M | 24 | NA | Primary | 12 |
| G40821 | M | 46 | NA | Primary | 6 |
| G40823 | F | 66 | NA | Primary | 4 |
| G40910 | M | 61 | NA | Primary | 2 |
| G40912 | M | 63 | NA | Primary | 8 |
| G40919 | F | 58 | NA | Primary | 6 |
| G40926 | M | 38 | NA | Primary | 1 |
| G40929 | F | 62 | NA | Primary | 8 |
| G41014 | M | 41 | NA | Primary | 4 |
| G4101502 | M | 50 | Yes | Primary | 9 |
| G41016 | M | 29 | Yes | Primary | 8 |
| G4101602 | M | 49 | NA | Primary | 8 |
| G4112002 | M | 64 | Yes | Primary | 3 |
| G41128 | M | 53 | Yes | Primary | 2 |
| G41213 | F | 60 | NA | Primary | 12 |
| G41230 | F | 69 | Yes | Primary | 6 |
| GIS: German immunohistochemical scores | | | |  |  |

**Table S3** The primer sequences of RT-qPCR.

| Genes | Primer sequences |
| --- | --- |
| *FAM20C* | forward primer: CTGTTCGAGCACCCGCT |
|  | reverse primer: GCATGCGGCCAGTCC |
| *18S* | forward primer: GCAGAATCCACGCCAGTACAAGAT |
|  | reverse primer: TCTTCTTCAGTCGCTCCAGGTCTT |
| *MMP2* | forward primer: TACAGGATCATTGGCTACACACC |
|  | reverse primer: GGTCACATCGCTCCAGACT |
| *MMP9* | forward primer: TGTACCGCTATGGTTACACTCG |
|  | reverse primer: GGCAGGGACAGTTGCTTCT |

**Table S4** The list of genes positively correlated to high FAM20Cexpression in GBM (TCGA RNA-seq, CGGA RNA-seq, and CPTAC protein datasets).

TCGA GBM RNA-seq datasets (r value, Pearson correlation)

| Genes | r value | Genes | r value | Genes | r value | Genes | r value | Genes | r value | Genes | r value |
| --- | --- | --- | --- | --- | --- | --- | --- | --- | --- | --- | --- |
| FAM20C | 1.0000 | HK1 | 0.5027 | MAN2A1 | 0.4352 | PLEKHM1 | 0.3853 | FBXW5 | 0.3495 | LILRB1 | 0.3229 |
| BCL3 | 0.7665 | ALKBH5 | 0.5026 | KYNU | 0.4351 | GNPNAT1 | 0.3850 | MUC3A | 0.3495 | KDM5C | 0.3229 |
| FOSL2 | 0.7463 | ESYT1 | 0.5024 | TBX2 | 0.4349 | TBC1D9B | 0.3849 | FKBP1A | 0.3494 | CYP51A1 | 0.3228 |
| LIF | 0.7391 | TMEM43 | 0.5024 | ATL3 | 0.4347 | ALG2 | 0.3848 | SMG6 | 0.3491 | YY2 | 0.3226 |
| SBNO2 | 0.7375 | IL13RA1 | 0.5007 | CISH | 0.4345 | RHOG | 0.3848 | GLIPR1 | 0.3490 | ZSCAN25 | 0.3226 |
| RUNX1 | 0.7370 | IFNGR2 | 0.5006 | SEPT9 | 0.4344 | AP003419.1 | 0.3847 | PPP1R9B | 0.3489 | TRIM14 | 0.3224 |
| CAVIN1 | 0.7370 | LIMS1 | 0.5002 | SFXN3 | 0.4343 | TM9SF4 | 0.3847 | SIGLEC5 | 0.3488 | ZNF710 | 0.3222 |
| PPP1R18 | 0.7304 | JUNB | 0.5002 | FZD8 | 0.4343 | SSBP4 | 0.3846 | PBDC1 | 0.3488 | CTNS | 0.3221 |
| SOCS3 | 0.7217 | TGFBI | 0.5000 | RAB20 | 0.4341 | KCTD12 | 0.3845 | CLN6 | 0.3485 | TLR2 | 0.3220 |
| PLOD3 | 0.7191 | COL8A1 | 0.4999 | TAGLN | 0.4336 | EPN1 | 0.3845 | SLC24A1 | 0.3484 | C3 | 0.3220 |
| EHD2 | 0.7129 | TNFAIP3 | 0.4998 | ZFYVE1 | 0.4335 | NID1 | 0.3843 | EAF1 | 0.3484 | PAXIP1 | 0.3220 |
| CHPF2 | 0.7093 | CCDC9 | 0.4997 | SLC4A2 | 0.4335 | TACSTD2 | 0.3842 | CPN2 | 0.3484 | S100A4 | 0.3220 |
| LZTS1 | 0.7062 | PTPRU | 0.4996 | ST3GAL1 | 0.4334 | MAPK1IP1L | 0.3841 | ZNF316 | 0.3484 | ERN2 | 0.3219 |
| C1RL | 0.7039 | SPATS2L | 0.4993 | LMAN2 | 0.4333 | ERGIC1 | 0.3840 | KLK13 | 0.3484 | SNAPC2 | 0.3219 |
| HSD3B7 | 0.7035 | CAV1 | 0.4992 | CAVIN3 | 0.4333 | GPR39 | 0.3840 | SMAGP | 0.3482 | PICALM | 0.3218 |
| MRC2 | 0.7032 | AKAP12 | 0.4990 | ATXN1 | 0.4331 | SLC16A6 | 0.3839 | CPZ | 0.3481 | PIGB | 0.3217 |
| ADAM12 | 0.6974 | ITGB1 | 0.4990 | GPR157 | 0.4328 | WTIP | 0.3839 | CBX6 | 0.3481 | TMEM239 | 0.3217 |
| PYGL | 0.6964 | SRD5A1 | 0.4990 | UNC45A | 0.4324 | SFT2D2 | 0.3839 | FKBP5 | 0.3480 | RXRA | 0.3216 |
| ITGA5 | 0.6944 | STK10 | 0.4987 | GNS | 0.4324 | UGGT1 | 0.3839 | RGS19 | 0.3480 | CASP4 | 0.3216 |
| FURIN | 0.6925 | ENG | 0.4985 | NOD2 | 0.4324 | MMP9 | 0.3836 | C19orf71 | 0.3479 | EXTL3 | 0.3215 |
| METRNL | 0.6871 | ITGB5 | 0.4985 | EEF2K | 0.4323 | ACTR3 | 0.3836 | DEPP1 | 0.3479 | CTF1 | 0.3215 |
| MMP14 | 0.6864 | DPP9 | 0.4977 | NACC2 | 0.4320 | REST | 0.3835 | SMCO2 | 0.3478 | AL035460.1 | 0.3214 |
| RIN1 | 0.6859 | EMP3 | 0.4976 | TACC1 | 0.4318 | MOXD1 | 0.3833 | FOXL1 | 0.3478 | OGFOD3 | 0.3214 |
| BHLHE40 | 0.6828 | LDLR | 0.4971 | PLS3 | 0.4314 | PRKD2 | 0.3833 | REXO2 | 0.3478 | RARRES1 | 0.3213 |
| ICAM1 | 0.6818 | PLOD2 | 0.4970 | PXDN | 0.4314 | C9orf64 | 0.3832 | CLEC4D | 0.3477 | TTC7A | 0.3213 |
| FOSL1 | 0.6809 | RREB1 | 0.4968 | LRRC15 | 0.4314 | PLAGL2 | 0.3831 | TCIM | 0.3476 | PTP4A3 | 0.3212 |
| MYADM | 0.6807 | P3H1 | 0.4967 | PFN1 | 0.4313 | AL355102.2 | 0.3830 | SIGLEC7 | 0.3476 | TBC1D2 | 0.3212 |
| MVP | 0.6783 | MGAT1 | 0.4964 | PDGFRB | 0.4312 | RFX1 | 0.3829 | LASP1 | 0.3476 | SEPT11 | 0.3209 |
| GALNT2 | 0.6775 | CXCL3 | 0.4961 | CRYBG1 | 0.4311 | RCOR1 | 0.3826 | TNIP3 | 0.3474 | PFKP | 0.3209 |
| LMNA | 0.6760 | ZBTB7A | 0.4958 | TNFRSF10B | 0.4309 | CARD9 | 0.3824 | LCP2 | 0.3473 | DPAGT1 | 0.3209 |
| ZYX | 0.6728 | IMPDH1 | 0.4957 | COL15A1 | 0.4308 | CDV3 | 0.3824 | DLL4 | 0.3471 | AK4 | 0.3209 |
| PPP1R3B | 0.6728 | HSP90B1 | 0.4955 | MYL9 | 0.4305 | TMEM260 | 0.3823 | FAM102A | 0.3471 | PTPN2 | 0.3208 |
| ACTN1 | 0.6702 | STAB1 | 0.4952 | RCC1L | 0.4304 | MAN1B1 | 0.3821 | HEXA | 0.3469 | FBXL13 | 0.3207 |
| HIVEP3 | 0.6698 | SDC1 | 0.4950 | SDF2L1 | 0.4303 | GTSF1L | 0.3819 | DNM2 | 0.3468 | UBE2Z | 0.3207 |
| C1R | 0.6693 | CALU | 0.4946 | SLC39A7 | 0.4302 | RELT | 0.3819 | EML2 | 0.3468 | TP53I11 | 0.3207 |
| CHSY1 | 0.6676 | MBOAT7 | 0.4941 | GPI | 0.4302 | ACTR2 | 0.3818 | RARA | 0.3468 | PPP1R37 | 0.3207 |
| SPRED3 | 0.6668 | GALNS | 0.4940 | TENT5A | 0.4300 | TEP1 | 0.3817 | ATP6V1C2 | 0.3467 | SIRPB2 | 0.3206 |
| CEBPD | 0.6666 | TREM1 | 0.4937 | RNF216 | 0.4298 | FAM214B | 0.3816 | IL9R | 0.3467 | ADGRF2 | 0.3205 |
| TNFRSF1A | 0.6656 | PTGFRN | 0.4932 | NFE2L2 | 0.4297 | CYTH4 | 0.3816 | MLLT1 | 0.3466 | SH3GL1 | 0.3204 |
| CLCF1 | 0.6641 | TSPAN9 | 0.4930 | NEXN | 0.4294 | ADCY9 | 0.3812 | BAIAP2 | 0.3466 | ATP2A2 | 0.3203 |
| SERPINE1 | 0.6640 | ATP8B1 | 0.4930 | AC187653.1 | 0.4293 | AC092143.1 | 0.3812 | VAV3 | 0.3465 | LOXL4 | 0.3203 |
| ACTB | 0.6625 | ECM1 | 0.4920 | SMPD1 | 0.4293 | IL2RA | 0.3811 | KCTD11 | 0.3465 | INSR | 0.3202 |
| MAP2K3 | 0.6618 | RFTN1 | 0.4919 | TRPM4 | 0.4292 | CSNK1D | 0.3810 | RGS17 | 0.3463 | TBC1D25 | 0.3202 |
| MYOF | 0.6597 | WIPF1 | 0.4912 | GNA12 | 0.4292 | GXYLT2 | 0.3810 | NECTIN4 | 0.3461 | BRI3 | 0.3201 |
| COLGALT1 | 0.6593 | GCC1 | 0.4912 | PFKFB3 | 0.4291 | SEC24A | 0.3809 | PIK3R5 | 0.3460 | RIPOR1 | 0.3200 |
| TCAF2 | 0.6591 | IL17RA | 0.4912 | ELMSAN1 | 0.4290 | STK11 | 0.3809 | NATD1 | 0.3458 | ABCF2 | 0.3200 |
| SLC16A3 | 0.6553 | PTGES | 0.4909 | GPX8 | 0.4289 | AKAP13 | 0.3808 | TSLP | 0.3458 | APOBEC3D | 0.3199 |
| COL6A1 | 0.6496 | NTAN1 | 0.4909 | ESM1 | 0.4288 | ACSS2 | 0.3807 | GUCD1 | 0.3456 | MTHFD1L | 0.3198 |
| CD276 | 0.6488 | SPRED2 | 0.4905 | TMCO3 | 0.4288 | SLC38A7 | 0.3805 | MAF | 0.3456 | TMEM102 | 0.3197 |
| NECTIN2 | 0.6476 | TNIP1 | 0.4905 | TMEM250 | 0.4288 | PMM2 | 0.3802 | ZNF777 | 0.3455 | CGNL1 | 0.3197 |
| VIM | 0.6438 | GLG1 | 0.4904 | NAGLU | 0.4287 | CARM1 | 0.3802 | INO80 | 0.3455 | WDR44 | 0.3197 |
| PTPN9 | 0.6408 | ZDHHC18 | 0.4903 | SDC4 | 0.4286 | CRACR2A | 0.3802 | GJB2 | 0.3455 | SHROOM2 | 0.3196 |
| PLAU | 0.6393 | EFNB2 | 0.4901 | C20orf141 | 0.4284 | GLIS3 | 0.3798 | RAI1 | 0.3455 | MAP3K8 | 0.3195 |
| HSPA5 | 0.6381 | FAM129A | 0.4892 | CHRNB4 | 0.4282 | TMUB1 | 0.3796 | NUP98 | 0.3454 | DDX41 | 0.3195 |
| PVR | 0.6359 | TNFRSF12A | 0.4889 | LTBP1 | 0.4281 | FNDC4 | 0.3795 | IL21R | 0.3454 | CDK16 | 0.3194 |
| CD44 | 0.6352 | FES | 0.4882 | AKT1 | 0.4277 | CSNK1G1 | 0.3795 | RFX8 | 0.3453 | PLEKHM2 | 0.3193 |
| FNDC3B | 0.6347 | CDKN1A | 0.4876 | NLRP12 | 0.4275 | LGALS3BP | 0.3795 | NAIP | 0.3453 | GOLGA2 | 0.3193 |
| PLAUR | 0.6337 | MEDAG | 0.4876 | MLKL | 0.4274 | PCSK1 | 0.3793 | HCAR3 | 0.3452 | TSPO | 0.3193 |
| CA12 | 0.6324 | MKNK2 | 0.4874 | FPR2 | 0.4269 | MOCOS | 0.3791 | TSHZ2 | 0.3452 | CD63 | 0.3191 |
| RAB13 | 0.6321 | GALNT11 | 0.4873 | IFI16 | 0.4267 | TMEM44 | 0.3790 | RAB34 | 0.3452 | SLC22A16 | 0.3190 |
| VASP | 0.6316 | CLPTM1L | 0.4873 | ADRA1D | 0.4267 | IGFBP6 | 0.3790 | RAB7B | 0.3452 | TWSG1 | 0.3190 |
| CEBPB | 0.6314 | GPBAR1 | 0.4871 | ARHGAP30 | 0.4265 | SSH1 | 0.3790 | C21orf62 | 0.3452 | NAALADL2 | 0.3190 |
| PDIA4 | 0.6311 | CCDC102A | 0.4870 | TMED10 | 0.4264 | COL22A1 | 0.3789 | MRC1 | 0.3450 | SCAMP2 | 0.3189 |
| MAPKAPK2 | 0.6306 | SH3PXD2B | 0.4870 | IL1R1 | 0.4263 | NFATC4 | 0.3788 | SLC9A4 | 0.3450 | MAOB | 0.3189 |
| ADAM9 | 0.6297 | RCN3 | 0.4869 | SRPRA | 0.4263 | LONP1 | 0.3787 | TMBIM1 | 0.3450 | BOC | 0.3187 |
| ITPKC | 0.6297 | CDH11 | 0.4866 | MYO1F | 0.4263 | SPAG4 | 0.3787 | CITED1 | 0.3449 | LY9 | 0.3187 |
| TNC | 0.6297 | UBE3C | 0.4864 | DYNLT3 | 0.4262 | CHRDL2 | 0.3786 | MICAL2 | 0.3449 | HECTD3 | 0.3187 |
| TLCD2 | 0.6287 | SUMF1 | 0.4864 | SLC26A2 | 0.4260 | RHBDF1 | 0.3785 | PPP1R13L | 0.3448 | GLB1L | 0.3187 |
| SLC35C1 | 0.6286 | SSH3 | 0.4862 | DPF3 | 0.4259 | NID2 | 0.3784 | SLC2A5 | 0.3448 | OR4C6 | 0.3186 |
| LIMK1 | 0.6285 | SLC16A13 | 0.4859 | TGOLN2 | 0.4258 | KIAA1211L | 0.3784 | C4BPB | 0.3447 | EFL1 | 0.3186 |
| VASN | 0.6274 | COL1A2 | 0.4856 | C6orf47 | 0.4257 | PABPC4 | 0.3782 | GPAA1 | 0.3446 | DAB2 | 0.3185 |
| CHST2 | 0.6264 | PKD2 | 0.4853 | AJUBA | 0.4255 | ARSG | 0.3782 | SERPINB6 | 0.3444 | STK35 | 0.3185 |
| PTPN12 | 0.6263 | DCBLD2 | 0.4852 | EMID1 | 0.4254 | SLC12A4 | 0.3782 | NANS | 0.3444 | SLC25A24 | 0.3184 |
| CHPF | 0.6260 | PRSS23 | 0.4851 | COL8A2 | 0.4254 | LEP | 0.3780 | TMEM185B | 0.3442 | RAB31 | 0.3183 |
| NRP1 | 0.6260 | CTSB | 0.4850 | ABHD15 | 0.4250 | FAH | 0.3780 | ABCA13 | 0.3441 | BAG5 | 0.3182 |
| ERO1A | 0.6249 | BCAM | 0.4849 | SYTL2 | 0.4249 | C9orf66 | 0.3779 | KTN1 | 0.3441 | ZNF579 | 0.3182 |
| CHI3L1 | 0.6246 | PTPN14 | 0.4836 | STK40 | 0.4249 | COX19 | 0.3777 | WARS | 0.3440 | COL6A5 | 0.3182 |
| MYH9 | 0.6223 | OPA3 | 0.4835 | POTEF | 0.4245 | NAGS | 0.3777 | AP5B1 | 0.3439 | SERTAD1 | 0.3181 |
| ITGA3 | 0.6211 | SLC43A3 | 0.4833 | HOMER2 | 0.4245 | ABHD2 | 0.3776 | SERTAD2 | 0.3439 | ROCK2 | 0.3181 |
| ITPRIP | 0.6206 | HSPB1 | 0.4830 | OLFML2A | 0.4244 | RNASE10 | 0.3776 | ADRB3 | 0.3438 | RDH8 | 0.3181 |
| PXN | 0.6189 | HK2 | 0.4826 | TENT5B | 0.4244 | GNB2 | 0.3773 | NT5C1B | 0.3437 | CAD | 0.3180 |
| ADAMTS14 | 0.6188 | APLP2 | 0.4817 | LACTB | 0.4243 | SCNN1B | 0.3771 | FCF1 | 0.3437 | FAM71D | 0.3180 |
| SELENON | 0.6185 | IRS2 | 0.4816 | KIAA0040 | 0.4239 | MAP1S | 0.3770 | RILPL2 | 0.3436 | GIP | 0.3180 |
| MAP3K6 | 0.6182 | CA9 | 0.4816 | NAB2 | 0.4238 | TXLNA | 0.3766 | GPR4 | 0.3436 | RASAL3 | 0.3180 |
| MICALL2 | 0.6174 | P2RY6 | 0.4814 | SLC35E1 | 0.4237 | PTP4A2 | 0.3765 | VAV1 | 0.3435 | NADK | 0.3180 |
| SYDE1 | 0.6168 | PDPN | 0.4809 | FAM114A1 | 0.4231 | TRRAP | 0.3764 | SCMH1 | 0.3433 | NLRP6 | 0.3180 |
| KLF16 | 0.6153 | SWAP70 | 0.4807 | TNFSF15 | 0.4229 | PATL1 | 0.3764 | DDRGK1 | 0.3432 | CCR2 | 0.3179 |
| EFEMP2 | 0.6150 | TRIP6 | 0.4806 | LIPN | 0.4228 | MMP1 | 0.3763 | MTDH | 0.3431 | PIK3CD | 0.3179 |
| PLOD1 | 0.6145 | CALD1 | 0.4801 | RIN3 | 0.4226 | UBTD1 | 0.3763 | MPC1L | 0.3430 | AGTRAP | 0.3178 |
| TRAM2 | 0.6136 | RCAN1 | 0.4801 | SLC35D1 | 0.4226 | ZNF865 | 0.3761 | TASP1 | 0.3429 | RECQL | 0.3177 |
| SPOCD1 | 0.6131 | EPHA1 | 0.4800 | VENTX | 0.4225 | CTTN | 0.3759 | DCAF6 | 0.3429 | KCNF1 | 0.3177 |
| SLC12A7 | 0.6130 | EPHA2 | 0.4799 | SEMA3F | 0.4225 | TESMIN | 0.3758 | BTBD19 | 0.3428 | MAD1L1 | 0.3174 |
| PIEZO1 | 0.6126 | LPP | 0.4798 | PCYT1A | 0.4224 | SHKBP1 | 0.3758 | ILDR1 | 0.3427 | AC112229.3 | 0.3173 |
| STAT3 | 0.6122 | LAMA5 | 0.4798 | TRANK1 | 0.4222 | CAMK1 | 0.3758 | CDC37 | 0.3427 | IL27 | 0.3173 |
| P4HB | 0.6118 | NFKB2 | 0.4797 | GAPDH | 0.4222 | NCF1 | 0.3757 | RAC1 | 0.3426 | BAIAP2L1 | 0.3173 |
| FGFR1 | 0.6113 | C5AR1 | 0.4796 | ERBB2 | 0.4220 | CBLC | 0.3756 | PTGS1 | 0.3424 | KIF1C | 0.3172 |
| ARF6 | 0.6099 | OSBPL3 | 0.4794 | C10orf55 | 0.4219 | RNF145 | 0.3754 | KCNE1 | 0.3423 | ARHGEF3 | 0.3172 |
| NFKBIZ | 0.6090 | ITGAM | 0.4793 | COPG1 | 0.4217 | AP3D1 | 0.3754 | GALNT18 | 0.3423 | PCDH12 | 0.3172 |
| MYO1G | 0.6081 | ITK | 0.4791 | MELTF | 0.4212 | PACSIN2 | 0.3754 | SRPX | 0.3422 | SERPINB4 | 0.3171 |
| FKBP9 | 0.6079 | TNFRSF11A | 0.4791 | LAMB3 | 0.4212 | POLG | 0.3754 | FBRS | 0.3422 | DENND1A | 0.3170 |
| LATS2 | 0.6073 | PLEKHF1 | 0.4790 | RUFY1 | 0.4208 | DPP4 | 0.3752 | CXCL1 | 0.3421 | LDLRAD2 | 0.3169 |
| MAFK | 0.6069 | LRRC32 | 0.4790 | ALOX5 | 0.4207 | DNAJB1 | 0.3752 | PRXL2C | 0.3421 | WNK4 | 0.3169 |
| VDR | 0.6056 | SGSH | 0.4787 | SLC51A | 0.4205 | DOCK6 | 0.3751 | SIGLEC12 | 0.3420 | DNAJB11 | 0.3168 |
| PLXNB2 | 0.6055 | RIPK1 | 0.4786 | UBC | 0.4204 | TCN1 | 0.3747 | BNIP2 | 0.3420 | C6orf106 | 0.3167 |
| FLNA | 0.6051 | BMP1 | 0.4776 | PARVB | 0.4204 | FAM126A | 0.3747 | ZNF330 | 0.3419 | RUNX3 | 0.3167 |
| SLC22A18 | 0.6049 | ZNF217 | 0.4774 | PARVA | 0.4203 | ANKRD33 | 0.3746 | SH3RF2 | 0.3419 | TIMP2 | 0.3164 |
| PLIN3 | 0.6030 | PRKACA | 0.4774 | TMEM109 | 0.4201 | JPH1 | 0.3745 | ADPGK | 0.3419 | RAB3GAP2 | 0.3164 |
| TMEM158 | 0.6023 | NUAK2 | 0.4771 | TGFBR2 | 0.4199 | STARD13 | 0.3744 | MT2A | 0.3418 | CYB5R3 | 0.3163 |
| BDKRB2 | 0.6019 | NR2F6 | 0.4768 | EGR1 | 0.4198 | PHRF1 | 0.3744 | ADAM19 | 0.3417 | PKN1 | 0.3162 |
| TIMP1 | 0.6016 | CLRN3 | 0.4767 | HRH2 | 0.4198 | ZNF526 | 0.3743 | ATF6 | 0.3417 | TNRC18 | 0.3162 |
| IQGAP1 | 0.6016 | SLC6A6 | 0.4766 | MFSD10 | 0.4198 | HS3ST3A1 | 0.3742 | CENPB | 0.3415 | FBXO17 | 0.3161 |
| HRH1 | 0.6015 | NCLN | 0.4761 | RIPOR3 | 0.4197 | INSL3 | 0.3742 | OGFR | 0.3412 | ARL14 | 0.3160 |
| TNKS1BP1 | 0.6014 | DAPK3 | 0.4760 | ACPP | 0.4197 | PLEKHG2 | 0.3738 | PDLIM1 | 0.3411 | MYL12A | 0.3160 |
| NOTCH3 | 0.6011 | EDEM1 | 0.4759 | RAB11FIP5 | 0.4196 | ENTHD1 | 0.3738 | RAPH1 | 0.3410 | SQSTM1 | 0.3159 |
| FCGBP | 0.6009 | LGALS8 | 0.4758 | IFFO2 | 0.4193 | SFN | 0.3736 | MEFV | 0.3410 | XKRX | 0.3158 |
| CFI | 0.5998 | CLIC1 | 0.4758 | DBNL | 0.4193 | CBLN3 | 0.3734 | FLOT1 | 0.3407 | PLXDC1 | 0.3157 |
| WWTR1 | 0.5997 | APOBR | 0.4757 | TWF2 | 0.4192 | IGF2BP2 | 0.3734 | KIF16B | 0.3407 | ACTBL2 | 0.3156 |
| SLC2A3 | 0.5996 | RBMS1 | 0.4753 | ZNF800 | 0.4187 | SDK1 | 0.3732 | MCFD2 | 0.3406 | FBP1 | 0.3156 |
| ETV6 | 0.5991 | CD163 | 0.4752 | IL1RN | 0.4185 | GALM | 0.3730 | TPST1 | 0.3405 | FKBP11 | 0.3155 |
| NFKB1 | 0.5991 | FAM3C | 0.4749 | PLCB3 | 0.4182 | IMPA2 | 0.3730 | TRIM44 | 0.3405 | SERPINB9 | 0.3155 |
| ARL4C | 0.5989 | FAM83G | 0.4746 | CD274 | 0.4182 | CCR1 | 0.3729 | SNAI2 | 0.3402 | BICD2 | 0.3153 |
| GGN | 0.5975 | MAPK13 | 0.4744 | CATSPER1 | 0.4180 | ZFYVE26 | 0.3729 | GAL3ST4 | 0.3402 | STAT6 | 0.3153 |
| SRPX2 | 0.5956 | TSHZ3 | 0.4742 | PRF1 | 0.4178 | CD7 | 0.3727 | RNF149 | 0.3402 | ARRDC3 | 0.3153 |
| LRP10 | 0.5953 | HEXB | 0.4739 | DES | 0.4177 | CNPY4 | 0.3724 | PRTN3 | 0.3400 | DOCK1 | 0.3151 |
| RELB | 0.5945 | SURF4 | 0.4738 | BATF | 0.4174 | IL10RB | 0.3724 | ZNF343 | 0.3400 | PTPN18 | 0.3151 |
| PTX3 | 0.5943 | CAMK2D | 0.4736 | SEC14L2 | 0.4174 | ALG12 | 0.3724 | PLA2R1 | 0.3400 | RNF31 | 0.3151 |
| MGAT4B | 0.5943 | SNX9 | 0.4735 | SLC36A1 | 0.4168 | PAPLN | 0.3723 | FCRL6 | 0.3399 | KRTAP2-3 | 0.3151 |
| NUCB1 | 0.5942 | TSPAN4 | 0.4733 | CXCL6 | 0.4167 | PDGFA | 0.3722 | YWHAG | 0.3398 | CDX1 | 0.3150 |
| FAM129B | 0.5932 | CKAP4 | 0.4727 | MESD | 0.4165 | CTTNBP2NL | 0.3721 | TRABD | 0.3397 | PRRC1 | 0.3150 |
| ANGPTL4 | 0.5932 | P3H3 | 0.4725 | PARP4 | 0.4164 | IL2RB | 0.3721 | KRBA1 | 0.3397 | CHP1 | 0.3150 |
| ARSJ | 0.5931 | CYBC1 | 0.4724 | NPC1 | 0.4163 | GRK2 | 0.3721 | OSBP2 | 0.3397 | ADAP2 | 0.3150 |
| ACP2 | 0.5925 | PRKCSH | 0.4724 | RCN1 | 0.4162 | ENPEP | 0.3720 | HFE | 0.3396 | CR1 | 0.3149 |
| STEAP3 | 0.5924 | TLN1 | 0.4718 | APCDD1L | 0.4159 | IL20 | 0.3717 | MTCL1 | 0.3395 | CCPG1 | 0.3149 |
| ORAI2 | 0.5908 | FHOD1 | 0.4718 | CAPN1 | 0.4159 | CASP8 | 0.3716 | YKT6 | 0.3395 | PRICKLE2 | 0.3147 |
| HDAC7 | 0.5897 | SPSB1 | 0.4715 | TTC39A | 0.4159 | ENDOD1 | 0.3714 | CXCL14 | 0.3395 | C4orf54 | 0.3147 |
| CDCP1 | 0.5893 | PRDM1 | 0.4714 | MYBPH | 0.4157 | GALC | 0.3713 | CDR2 | 0.3394 | SNW1 | 0.3146 |
| COL6A2 | 0.5889 | SIL1 | 0.4713 | ESR2 | 0.4156 | CSF2RB | 0.3712 | AP2A2 | 0.3394 | PECAM1 | 0.3146 |
| ELL | 0.5881 | SLC17A9 | 0.4713 | SNX20 | 0.4155 | SPTY2D1 | 0.3710 | HCLS1 | 0.3394 | PRPS2 | 0.3145 |
| TM9SF1 | 0.5878 | TMEM26 | 0.4713 | SAMD4A | 0.4154 | SPOCK2 | 0.3706 | MET | 0.3393 | GMIP | 0.3144 |
| DTX2 | 0.5875 | TPM3 | 0.4711 | MPZL2 | 0.4153 | HYOU1 | 0.3706 | SP6 | 0.3393 | PROSER3 | 0.3143 |
| LOXL1 | 0.5866 | GBE1 | 0.4710 | EML3 | 0.4152 | SLC15A1 | 0.3705 | SBK2 | 0.3393 | MROH9 | 0.3143 |
| BET1L | 0.5859 | RNH1 | 0.4709 | TRPV4 | 0.4150 | MOV10L1 | 0.3705 | URGCP | 0.3391 | NCKAP1L | 0.3143 |
| COL5A1 | 0.5858 | ADAM10 | 0.4709 | CXCL8 | 0.4147 | IQSEC1 | 0.3703 | SIGLEC15 | 0.3391 | ST5 | 0.3141 |
| TEAD3 | 0.5843 | B3GALT6 | 0.4706 | MUCL1 | 0.4145 | PELO | 0.3703 | ARPC2 | 0.3391 | RBM20 | 0.3141 |
| PLXND1 | 0.5831 | PTPRE | 0.4706 | STBD1 | 0.4145 | FLT1 | 0.3701 | ACE | 0.3390 | TMEM45A | 0.3140 |
| ITGB3 | 0.5831 | IGFBP3 | 0.4706 | MRTFB | 0.4144 | TBL1X | 0.3700 | DIAPH1 | 0.3389 | ELK4 | 0.3139 |
| MYO1C | 0.5825 | PTGIR | 0.4705 | FADD | 0.4143 | ANXA5 | 0.3698 | CITED2 | 0.3389 | TRIM50 | 0.3138 |
| ANXA2 | 0.5825 | PAM | 0.4700 | RNASE2 | 0.4142 | ITGA1 | 0.3696 | CYREN | 0.3389 | LARP1 | 0.3137 |
| LOXL3 | 0.5820 | DUSP4 | 0.4697 | ETF1 | 0.4141 | SMURF1 | 0.3696 | SH2D4A | 0.3388 | UPF1 | 0.3137 |
| LAMB1 | 0.5814 | RIOX1 | 0.4696 | STAT5A | 0.4140 | PTPRF | 0.3695 | CD68 | 0.3386 | DDOST | 0.3136 |
| FBLIM1 | 0.5810 | LHFPL2 | 0.4693 | ADCY3 | 0.4140 | CYB561 | 0.3693 | SPHK1 | 0.3386 | SLC35A4 | 0.3136 |
| SUSD6 | 0.5809 | TMEM8A | 0.4693 | FJX1 | 0.4139 | SLC2A1 | 0.3693 | MROH1 | 0.3384 | DNAJC5 | 0.3136 |
| LOXL2 | 0.5808 | GRB10 | 0.4693 | MDGA1 | 0.4139 | ZBTB38 | 0.3692 | KLRF2 | 0.3383 | B4GALT7 | 0.3135 |
| H6PD | 0.5807 | NAGA | 0.4691 | LITAF | 0.4138 | TPD52L2 | 0.3692 | LPO | 0.3383 | FCN1 | 0.3134 |
| IER5L | 0.5798 | LPCAT1 | 0.4691 | PITPNM1 | 0.4136 | KLF5 | 0.3690 | PTBP3 | 0.3383 | ZNF503 | 0.3134 |
| FZD7 | 0.5795 | EVC | 0.4691 | BRD4 | 0.4135 | FAM174A | 0.3689 | ERAP1 | 0.3382 | CCL11 | 0.3133 |
| SNX33 | 0.5786 | CLDN4 | 0.4689 | CFLAR | 0.4134 | ADGRA2 | 0.3689 | CCR3 | 0.3382 | POSTN | 0.3133 |
| LAMC1 | 0.5785 | SIGLEC9 | 0.4689 | SPRY2 | 0.4130 | GARS | 0.3689 | CAPG | 0.3381 | IGFBP5 | 0.3132 |
| COL4A2 | 0.5780 | CLIC4 | 0.4688 | FSTL1 | 0.4128 | LAIR1 | 0.3688 | MEF2D | 0.3380 | TYW1 | 0.3132 |
| MFSD12 | 0.5766 | SH2D2A | 0.4687 | NDEL1 | 0.4127 | ECPAS | 0.3688 | PYY | 0.3378 | ZFAND3 | 0.3131 |
| TRIP10 | 0.5765 | COL13A1 | 0.4686 | MXRA8 | 0.4127 | MAFB | 0.3688 | DMBX1 | 0.3378 | RHOH | 0.3131 |
| ZFP36L2 | 0.5765 | CHST12 | 0.4683 | ST3GAL2 | 0.4124 | OTUD7B | 0.3688 | AFAP1 | 0.3378 | KLHL21 | 0.3128 |
| ATP1A1 | 0.5763 | APOBEC3C | 0.4682 | UTF1 | 0.4124 | G0S2 | 0.3685 | CYP1B1 | 0.3378 | BECN1 | 0.3128 |
| LENG9 | 0.5762 | SLC27A3 | 0.4682 | LRFN3 | 0.4123 | SMARCAL1 | 0.3685 | TMEM164 | 0.3377 | IL1RL2 | 0.3126 |
| SH2B3 | 0.5760 | GDF15 | 0.4681 | CCL2 | 0.4122 | ARPIN | 0.3684 | TMEM87B | 0.3376 | LYVE1 | 0.3124 |
| BGN | 0.5753 | SLC8B1 | 0.4680 | EVA1B | 0.4121 | TRPM2 | 0.3684 | PUM3 | 0.3376 | KPRP | 0.3124 |
| FZD5 | 0.5750 | TMEM127 | 0.4680 | CIITA | 0.4118 | ZDHHC1 | 0.3682 | GCLM | 0.3375 | PHETA2 | 0.3123 |
| SHC1 | 0.5748 | TMOD3 | 0.4679 | NLRX1 | 0.4113 | TPST2 | 0.3682 | ASCC3 | 0.3374 | FBXL18 | 0.3122 |
| TMEM214 | 0.5745 | IGFBP2 | 0.4678 | CYTIP | 0.4113 | SELE | 0.3681 | IL6 | 0.3374 | SEC23IP | 0.3121 |
| THBD | 0.5741 | RAC2 | 0.4677 | SLC25A37 | 0.4113 | PGM2L1 | 0.3681 | SPI1 | 0.3373 | SMTN | 0.3120 |
| MSN | 0.5741 | TAGLN2 | 0.4676 | IKBKE | 0.4112 | BICC1 | 0.3680 | EEA1 | 0.3372 | AC008763.3 | 0.3119 |
| SERPINH1 | 0.5739 | STX4 | 0.4676 | TRAF3 | 0.4111 | TMCO4 | 0.3678 | SAMD4B | 0.3372 | TMEM150B | 0.3119 |
| ACTN4 | 0.5735 | COL3A1 | 0.4675 | CXCL5 | 0.4109 | FAM83H | 0.3677 | C2CD2 | 0.3371 | CD4 | 0.3118 |
| MAFF | 0.5731 | KDELR2 | 0.4675 | FCAR | 0.4109 | ALDOA | 0.3677 | RPS6KA2 | 0.3371 | GALNT7 | 0.3116 |
| ARID5B | 0.5722 | EIF4H | 0.4673 | TLNRD1 | 0.4108 | IRF1 | 0.3676 | ANXA11 | 0.3370 | MPRIP | 0.3115 |
| TTYH3 | 0.5700 | MFSD1 | 0.4671 | FHL2 | 0.4107 | PCSK7 | 0.3673 | TBC1D1 | 0.3369 | FADS3 | 0.3115 |
| MYO1E | 0.5700 | RAP2B | 0.4669 | PLTP | 0.4105 | IL7R | 0.3673 | HOMER3 | 0.3368 | CCR4 | 0.3114 |
| MAN1C1 | 0.5700 | PPARGC1B | 0.4666 | POM121C | 0.4104 | MLPH | 0.3672 | FAM167B | 0.3368 | SLC25A19 | 0.3114 |
| NAMPT | 0.5698 | UBASH3B | 0.4666 | GGT5 | 0.4103 | AL163636.2 | 0.3671 | RFLNB | 0.3368 | CCL13 | 0.3113 |
| DPYD | 0.5696 | SERPINA1 | 0.4663 | CES2 | 0.4103 | FHL3 | 0.3671 | DSC2 | 0.3367 | CSNK1A1 | 0.3113 |
| SHISA5 | 0.5695 | ARSD | 0.4663 | DOK1 | 0.4102 | TNS4 | 0.3671 | ACTL10 | 0.3367 | TMEM184B | 0.3113 |
| ZC3H12A | 0.5694 | SYT12 | 0.4661 | PTPN22 | 0.4100 | FCGR2B | 0.3670 | ZNF837 | 0.3367 | RNF10 | 0.3113 |
| SLC9A1 | 0.5686 | UPP1 | 0.4661 | TBC1D22A | 0.4096 | INHBB | 0.3670 | SIAH2 | 0.3365 | ELANE | 0.3112 |
| GPRC5A | 0.5685 | TGFB3 | 0.4659 | MIER2 | 0.4092 | BCAT1 | 0.3669 | GNA11 | 0.3365 | USP9X | 0.3111 |
| TCIRG1 | 0.5681 | SH3D21 | 0.4653 | HMOX1 | 0.4092 | MACF1 | 0.3669 | RBAK | 0.3364 | PLCG2 | 0.3111 |
| ADAMTS1 | 0.5670 | HGSNAT | 0.4652 | ITGB2 | 0.4089 | EHBP1 | 0.3667 | CHST15 | 0.3363 | FMN1 | 0.3110 |
| COL4A1 | 0.5663 | TXNDC5 | 0.4649 | POFUT2 | 0.4088 | KLF10 | 0.3667 | AIDA | 0.3363 | ACSL1 | 0.3110 |
| ADM | 0.5662 | G6PD | 0.4644 | UBE2H | 0.4087 | ATF3 | 0.3666 | DEF6 | 0.3363 | GPR171 | 0.3110 |
| CLEC5A | 0.5653 | COL5A2 | 0.4644 | ARSB | 0.4085 | CTSC | 0.3666 | TPRG1 | 0.3363 | KRT18 | 0.3110 |
| PMEPA1 | 0.5647 | GPR132 | 0.4642 | ST14 | 0.4084 | NBPF10 | 0.3666 | MALL | 0.3363 | CHL1 | 0.3108 |
| BACE2 | 0.5643 | CSNK1G2 | 0.4642 | CUX1 | 0.4082 | P3H2 | 0.3665 | COL7A1 | 0.3362 | VEGFC | 0.3107 |
| GPR84 | 0.5635 | TGM2 | 0.4640 | TMEM115 | 0.4081 | AXL | 0.3663 | EFNB1 | 0.3362 | NLRP3 | 0.3105 |
| CCM2 | 0.5628 | PDIA6 | 0.4637 | SMAD1 | 0.4081 | TENM4 | 0.3662 | LPCAT3 | 0.3361 | ANKRD13D | 0.3105 |
| SLC39A1 | 0.5623 | RASSF5 | 0.4637 | FSTL3 | 0.4080 | TNFSF14 | 0.3662 | HELB | 0.3360 | DHRS4 | 0.3105 |
| KLF6 | 0.5623 | NRP2 | 0.4636 | ARHGAP4 | 0.4080 | ZNF394 | 0.3661 | AL603832.3 | 0.3359 | GOLGA5 | 0.3104 |
| LTBP3 | 0.5621 | CERS2 | 0.4636 | IL1RAP | 0.4079 | RIMBP3 | 0.3660 | GRB2 | 0.3359 | IPPK | 0.3103 |
| ITPR3 | 0.5621 | ANG | 0.4634 | ACSS3 | 0.4078 | CNTNAP3B | 0.3659 | PITPNM2 | 0.3358 | APOA2 | 0.3103 |
| NEK6 | 0.5615 | SLC22A23 | 0.4634 | DNMBP | 0.4078 | PTBP1 | 0.3657 | PTPN6 | 0.3358 | SLC2A14 | 0.3101 |
| TGFB1I1 | 0.5603 | TNFRSF18 | 0.4633 | TPM2 | 0.4077 | TBC1D2B | 0.3655 | SLC25A25 | 0.3358 | MFSD4B | 0.3100 |
| TPP1 | 0.5599 | CUL7 | 0.4632 | C8orf58 | 0.4074 | CLDN1 | 0.3655 | UTP25 | 0.3357 | IL10RA | 0.3100 |
| COL18A1 | 0.5588 | ELK3 | 0.4631 | OSCAR | 0.4072 | AGRN | 0.3655 | MAP3K20 | 0.3357 | CDC42EP5 | 0.3100 |
| WDR1 | 0.5582 | ADAMTSL4 | 0.4629 | SHROOM3 | 0.4072 | ZNF787 | 0.3653 | CDC42EP1 | 0.3356 | OSM | 0.3100 |
| SLC39A14 | 0.5581 | KDELR1 | 0.4629 | GLB1 | 0.4072 | BICD1 | 0.3651 | SORCS2 | 0.3356 | ALK | 0.3098 |
| ADAM8 | 0.5579 | MLEC | 0.4629 | CARS | 0.4071 | CNTNAP1 | 0.3648 | GSAP | 0.3356 | PLAT | 0.3097 |
| LOX | 0.5579 | SH3BP2 | 0.4627 | GAS6 | 0.4071 | PRR16 | 0.3647 | RTL3 | 0.3355 | SETX | 0.3097 |
| PKM | 0.5578 | MYBPC2 | 0.4627 | CEP112 | 0.4070 | KLHL36 | 0.3645 | CATSPERB | 0.3354 | KRT8 | 0.3096 |
| HS6ST1 | 0.5575 | F3 | 0.4626 | ZDHHC12 | 0.4068 | FNDC11 | 0.3645 | PXDNL | 0.3354 | C15orf48 | 0.3094 |
| B3GNT9 | 0.5572 | PPP6R1 | 0.4625 | SPRY4 | 0.4066 | KIF13B | 0.3644 | IL1R2 | 0.3353 | PIK3R6 | 0.3094 |
| OSMR | 0.5567 | STS | 0.4620 | UNC93B1 | 0.4065 | TWISTNB | 0.3639 | CCDC8 | 0.3351 | VPS9D1 | 0.3093 |
| KANK2 | 0.5566 | INAFM2 | 0.4620 | FCGR2A | 0.4064 | OPN3 | 0.3639 | RFFL | 0.3351 | RELA | 0.3092 |
| SYNPO | 0.5564 | OSBPL10 | 0.4620 | SSC5D | 0.4063 | FAM86C1 | 0.3639 | ARHGEF1 | 0.3351 | ADCK2 | 0.3092 |
| RBM47 | 0.5558 | PTPN7 | 0.4619 | ATP6AP1 | 0.4062 | EMILIN2 | 0.3637 | HSPA1A | 0.3351 | TOR1B | 0.3092 |
| PPP1R15A | 0.5554 | SNTB2 | 0.4619 | RPS6KA4 | 0.4062 | DMP1 | 0.3637 | JMJD6 | 0.3346 | MAST2 | 0.3092 |
| EMP1 | 0.5553 | RNPEPL1 | 0.4619 | PTPA | 0.4062 | PRKCD | 0.3637 | LRPAP1 | 0.3345 | TMEM150A | 0.3091 |
| FN1 | 0.5550 | CTNNA1 | 0.4615 | SARDH | 0.4058 | MUL1 | 0.3636 | NCR1 | 0.3345 | HARS2 | 0.3091 |
| CRELD2 | 0.5544 | NPAS2 | 0.4614 | EOGT | 0.4057 | IL18R1 | 0.3636 | CSTA | 0.3345 | PLSCR1 | 0.3091 |
| ATP13A3 | 0.5543 | LGALS1 | 0.4612 | HBEGF | 0.4057 | PIP5K1C | 0.3636 | KIRREL2 | 0.3344 | GGCX | 0.3090 |
| DLC1 | 0.5543 | MED15 | 0.4611 | ITGA2 | 0.4056 | MCTP2 | 0.3635 | AC135050.2 | 0.3342 | DPP3 | 0.3090 |
| EMILIN1 | 0.5541 | GALNT5 | 0.4606 | SPIDR | 0.4056 | TMED7-TICAM2 | 0.3635 | CASP5 | 0.3341 | ZFYVE28 | 0.3089 |
| DUSP3 | 0.5526 | SERPING1 | 0.4606 | INAFM1 | 0.4055 | KBTBD2 | 0.3634 | AIRE | 0.3341 | USP36 | 0.3089 |
| TGFB1 | 0.5525 | ACTG1 | 0.4602 | BACE1 | 0.4053 | ZNF267 | 0.3634 | NBPF14 | 0.3341 | HSPB6 | 0.3088 |
| LRP1 | 0.5523 | CYP2S1 | 0.4600 | ZDHHC7 | 0.4052 | NFATC2 | 0.3633 | SLC30A7 | 0.3341 | PDCD6IP | 0.3087 |
| ARHGAP29 | 0.5521 | AQP9 | 0.4599 | RETN | 0.4052 | HTRA3 | 0.3633 | PI4K2B | 0.3339 | RALBP1 | 0.3087 |
| GADD45A | 0.5521 | SLC35F6 | 0.4596 | FYCO1 | 0.4052 | ARAP1 | 0.3631 | GPAT3 | 0.3339 | BCL2L1 | 0.3086 |
| SLC20A1 | 0.5521 | PCOLCE | 0.4595 | SMIM3 | 0.4052 | CTNND1 | 0.3629 | KRT1 | 0.3339 | ARHGAP27 | 0.3085 |
| CTSA | 0.5519 | SLC11A1 | 0.4593 | VWA5A | 0.4050 | SLAMF8 | 0.3629 | MT1H | 0.3339 | MYH13 | 0.3085 |
| IRF2BPL | 0.5517 | GALNT4 | 0.4588 | DYRK3 | 0.4049 | SLA | 0.3628 | RYR3 | 0.3338 | CRAT | 0.3084 |
| MBD2 | 0.5513 | A2M | 0.4587 | CLDN14 | 0.4049 | PLEK2 | 0.3625 | PDXK | 0.3337 | SPNS1 | 0.3084 |
| DUSP5 | 0.5512 | TNFRSF1B | 0.4585 | KIFC3 | 0.4046 | ADAMTS9 | 0.3624 | SERPINA9 | 0.3336 | F8A2 | 0.3082 |
| TNFAIP2 | 0.5507 | ANO6 | 0.4583 | VGLL3 | 0.4046 | CFB | 0.3624 | CORO1B | 0.3336 | TCTN2 | 0.3082 |
| FLII | 0.5502 | NCSTN | 0.4583 | TMEM248 | 0.4044 | BNC2 | 0.3623 | LGALS7B | 0.3335 | APOL2 | 0.3082 |
| ARPC1B | 0.5500 | EPAS1 | 0.4578 | GPAT4 | 0.4044 | FLNC | 0.3622 | HNRNPF | 0.3335 | IFITM2 | 0.3082 |
| TMED9 | 0.5499 | IKBIP | 0.4575 | GALNT10 | 0.4043 | SIPA1L2 | 0.3621 | BCL2A1 | 0.3334 | TRIP11 | 0.3081 |
| PLEKHA4 | 0.5499 | PAPPA | 0.4575 | SLC2A10 | 0.4040 | GATAD2A | 0.3619 | AMPD3 | 0.3332 | GPX2 | 0.3081 |
| NOCT | 0.5499 | DPY19L1 | 0.4572 | COL5A3 | 0.4038 | PLEC | 0.3619 | IL24 | 0.3332 | CD109 | 0.3081 |
| PLXNA1 | 0.5493 | PLA2G15 | 0.4570 | CHST7 | 0.4037 | BICDL2 | 0.3619 | MTHFD1 | 0.3332 | ADORA2B | 0.3080 |
| GADD45B | 0.5492 | NUMB | 0.4569 | TEC | 0.4036 | KIAA2013 | 0.3617 | ERVV-2 | 0.3332 | ZBTB45 | 0.3080 |
| MMP19 | 0.5492 | GPR3 | 0.4567 | LTBR | 0.4036 | MME | 0.3617 | ERBIN | 0.3331 | JOSD1 | 0.3079 |
| LRRFIP1 | 0.5487 | TRPV2 | 0.4565 | CDH2 | 0.4032 | PQLC3 | 0.3617 | GRAP2 | 0.3330 | FPR1 | 0.3078 |
| PROS1 | 0.5486 | PGPEP1 | 0.4562 | WHAMM | 0.4031 | DYSF | 0.3616 | R3HDM4 | 0.3330 | LGALS7 | 0.3078 |
| PDIA5 | 0.5485 | KDELR3 | 0.4561 | SSR1 | 0.4030 | FLOT2 | 0.3615 | HS2ST1 | 0.3329 | ELN | 0.3077 |
| TICAM1 | 0.5484 | SOD2 | 0.4561 | SVIL | 0.4030 | ANXA1 | 0.3614 | CSF2 | 0.3328 | ZBTB2 | 0.3077 |
| LGALS3 | 0.5479 | MGAT2 | 0.4559 | SYNC | 0.4029 | ATP8B3 | 0.3613 | HES2 | 0.3328 | GIMAP1 | 0.3076 |
| MCL1 | 0.5474 | SUSD2 | 0.4558 | DENND3 | 0.4028 | PEAK3 | 0.3611 | BEAN1 | 0.3327 | R3HDML | 0.3075 |
| LDHA | 0.5469 | SMS | 0.4557 | VDAC1 | 0.4028 | NRCAM | 0.3610 | KRTAP1-5 | 0.3327 | ZNF786 | 0.3075 |
| YBX3 | 0.5467 | FBXO32 | 0.4557 | BCL10 | 0.4027 | TNFSF4 | 0.3610 | SH3GLB1 | 0.3327 | ZBED2 | 0.3072 |
| TRADD | 0.5455 | IL6R | 0.4555 | TPI1 | 0.4026 | ZNF746 | 0.3610 | MAN1A1 | 0.3327 | MRGPRF | 0.3072 |
| FGFRL1 | 0.5450 | KRT7 | 0.4554 | MOGS | 0.4025 | RNF19B | 0.3609 | DOCK2 | 0.3326 | HIP1 | 0.3071 |
| SGMS2 | 0.5449 | HMGXB3 | 0.4553 | PLB1 | 0.4025 | PQLC2 | 0.3609 | TRIM47 | 0.3325 | CSF1R | 0.3071 |
| ZBTB42 | 0.5446 | SIX5 | 0.4552 | ANGPT2 | 0.4024 | RNF135 | 0.3608 | SREBF1 | 0.3325 | SPINK4 | 0.3071 |
| NUMBL | 0.5441 | LAMP1 | 0.4550 | CALHM2 | 0.4023 | PDAP1 | 0.3606 | GOLGA3 | 0.3325 | CRTAP | 0.3071 |
| C1QTNF6 | 0.5441 | ARAF | 0.4549 | PACS1 | 0.4023 | BTBD7 | 0.3605 | C3orf58 | 0.3324 | TFAP2C | 0.3070 |
| CALR | 0.5426 | EPS8L2 | 0.4548 | FBN1 | 0.4022 | TRIP12 | 0.3605 | MLXIP | 0.3323 | CD300A | 0.3068 |
| MAN2B1 | 0.5422 | HDLBP | 0.4548 | EIF4G1 | 0.4022 | SCAMP4 | 0.3604 | CHSY3 | 0.3323 | REEP4 | 0.3068 |
| WIPI1 | 0.5418 | ZBTB7B | 0.4543 | CHRNA9 | 0.4019 | PNPLA6 | 0.3604 | OXA1L | 0.3322 | ITPKB | 0.3068 |
| PLBD2 | 0.5417 | PNPLA2 | 0.4543 | BAX | 0.4018 | DNAJC13 | 0.3604 | ITGB4 | 0.3321 | NEK9 | 0.3067 |
| GPC1 | 0.5413 | SH3TC1 | 0.4542 | SLC35A2 | 0.4017 | SLC25A43 | 0.3602 | NR1I2 | 0.3321 | CDSN | 0.3067 |
| IRAK2 | 0.5410 | SND1 | 0.4542 | SLC27A1 | 0.4016 | NFE2L3 | 0.3602 | RAB42 | 0.3319 | GALNT12 | 0.3067 |
| RAB27A | 0.5410 | LCTL | 0.4541 | ATP11A | 0.4015 | THEMIS2 | 0.3599 | ABTB2 | 0.3319 | SOD3 | 0.3066 |
| SLC10A3 | 0.5406 | TEAD4 | 0.4541 | SPRED1 | 0.4015 | HPS6 | 0.3598 | PLA2G5 | 0.3318 | LYZL2 | 0.3064 |
| MOB3A | 0.5405 | COL6A3 | 0.4540 | F11R | 0.4013 | TBC1D16 | 0.3598 | TRIM38 | 0.3317 | EFCAB14 | 0.3063 |
| STC1 | 0.5405 | GANAB | 0.4540 | PLEKHO2 | 0.4013 | SDCBP | 0.3598 | CEP170B | 0.3315 | DGKA | 0.3063 |
| ANPEP | 0.5399 | ISG20 | 0.4539 | PTPRJ | 0.4010 | FKRP | 0.3596 | RABGGTA | 0.3313 | CDH5 | 0.3063 |
| TRIB1 | 0.5396 | LAMA4 | 0.4537 | KCNQ1 | 0.4010 | ABL1 | 0.3595 | PCDH8 | 0.3310 | SCAF1 | 0.3063 |
| DNAJC3 | 0.5393 | SKI | 0.4537 | PPM1F | 0.4009 | ZBTB21 | 0.3595 | HTRA1 | 0.3308 | ARMCX2 | 0.3062 |
| RAB3D | 0.5382 | GRK5 | 0.4536 | MEGF8 | 0.4009 | NFKBIA | 0.3593 | PSORS1C1 | 0.3307 | MEX3D | 0.3060 |
| HK3 | 0.5382 | EXT2 | 0.4535 | UNC5B | 0.4008 | BATF3 | 0.3593 | TMPRSS13 | 0.3306 | PSD4 | 0.3060 |
| SLC4A3 | 0.5379 | VAV2 | 0.4534 | PLVAP | 0.4007 | CPA4 | 0.3592 | GRWD1 | 0.3306 | FCER1G | 0.3060 |
| LTBP2 | 0.5378 | AP5Z1 | 0.4528 | RAB38 | 0.4005 | DIRC1 | 0.3592 | FP565260.3 | 0.3305 | ARFRP1 | 0.3060 |
| AHNAK2 | 0.5373 | POLD4 | 0.4527 | ZFP36 | 0.4004 | CCDC70 | 0.3591 | ALPK1 | 0.3305 | NRN1 | 0.3059 |
| CD93 | 0.5364 | GCNT1 | 0.4527 | TNFSF11 | 0.4004 | SOCS1 | 0.3591 | ZNF12 | 0.3304 | MAML1 | 0.3057 |
| ADSSL1 | 0.5356 | WDR81 | 0.4526 | MEIKIN | 0.4003 | NFAM1 | 0.3590 | SIK1 | 0.3304 | MAP2K1 | 0.3057 |
| RDH10 | 0.5346 | LRRC8E | 0.4525 | CARMIL1 | 0.4002 | WDR55 | 0.3589 | CTAGE6 | 0.3303 | CAPN15 | 0.3057 |
| HSPG2 | 0.5345 | XYLT2 | 0.4523 | OR51E1 | 0.4002 | BTBD11 | 0.3588 | NUDT16 | 0.3303 | SYAP1 | 0.3056 |
| CSF1 | 0.5340 | GMPPA | 0.4522 | ADAMTS4 | 0.3999 | SYTL5 | 0.3588 | SEC16A | 0.3303 | PI4K2A | 0.3056 |
| JUN | 0.5338 | ARHGAP45 | 0.4522 | UCN2 | 0.3999 | IL15RA | 0.3588 | PPY | 0.3302 | IL22RA2 | 0.3055 |
| PLK3 | 0.5338 | FUT11 | 0.4519 | PRAG1 | 0.3998 | DDB2 | 0.3588 | RPTOR | 0.3302 | CD82 | 0.3055 |
| CD300E | 0.5337 | IPO4 | 0.4519 | MRTFA | 0.3997 | MRM2 | 0.3587 | IL17RC | 0.3302 | MXD1 | 0.3054 |
| IL4R | 0.5335 | FUCA2 | 0.4518 | UTP3 | 0.3996 | IFI30 | 0.3586 | PTK2B | 0.3301 | SERTAD3 | 0.3054 |
| NDRG1 | 0.5334 | KCNK6 | 0.4515 | RAB36 | 0.3996 | PCBP1 | 0.3585 | PALM2-AKAP2 | 0.3299 | SP1 | 0.3054 |
| BDKRB1 | 0.5334 | PTPRH | 0.4510 | HAS3 | 0.3996 | POTEG | 0.3585 | NCOR2 | 0.3298 | MOV10 | 0.3053 |
| NEDD9 | 0.5333 | SPON2 | 0.4508 | CYFIP1 | 0.3993 | SESN2 | 0.3585 | MAFG | 0.3298 | ALDH3B2 | 0.3052 |
| PLP2 | 0.5329 | POFUT1 | 0.4505 | CAPNS1 | 0.3993 | ZNF282 | 0.3584 | FSCN2 | 0.3297 | FICD | 0.3052 |
| TREML2 | 0.5325 | CRIM1 | 0.4504 | METTL7B | 0.3992 | ODAM | 0.3583 | CGB7 | 0.3296 | PIGS | 0.3051 |
| GRN | 0.5316 | ARID3A | 0.4504 | EDEM3 | 0.3988 | CDK13 | 0.3581 | PCDH1 | 0.3295 | CNNM4 | 0.3051 |
| PDLIM7 | 0.5309 | ABL2 | 0.4504 | FAM43A | 0.3988 | APP | 0.3578 | DNAJC2 | 0.3294 | NOX4 | 0.3051 |
| KIRREL1 | 0.5304 | ARHGDIA | 0.4503 | HS3ST3B1 | 0.3985 | MC1R | 0.3577 | ACOD1 | 0.3294 | DLG5 | 0.3050 |
| ALDH3B1 | 0.5300 | ADPRH | 0.4503 | GFPT2 | 0.3982 | SPP1 | 0.3573 | SIGLEC6 | 0.3294 | BRAT1 | 0.3050 |
| CD248 | 0.5299 | CEMIP2 | 0.4502 | SBSN | 0.3981 | SH3BP5 | 0.3573 | STX11 | 0.3293 | AP1S3 | 0.3049 |
| ADGRE5 | 0.5296 | OAF | 0.4493 | DSE | 0.3980 | STXBP2 | 0.3573 | APEX2 | 0.3293 | XKR8 | 0.3047 |
| ZNF436 | 0.5295 | PDK3 | 0.4492 | FKBP15 | 0.3980 | AVL9 | 0.3573 | CIC | 0.3293 | OR7E24 | 0.3047 |
| ERI1 | 0.5293 | ESYT2 | 0.4491 | ZFP36L1 | 0.3979 | IFITM3 | 0.3571 | ZSCAN22 | 0.3292 | IL17RE | 0.3046 |
| AGPAT2 | 0.5290 | GPC4 | 0.4491 | ABCD1 | 0.3978 | BLOC1S3 | 0.3570 | CD1B | 0.3291 | MED16 | 0.3046 |
| ARID5A | 0.5281 | GLMP | 0.4487 | MRGPRX3 | 0.3977 | SEMA7A | 0.3568 | F2RL3 | 0.3291 | LAPTM5 | 0.3046 |
| EHBP1L1 | 0.5280 | P4HA3 | 0.4486 | C6orf141 | 0.3976 | RANBP9 | 0.3566 | MCC | 0.3290 | AVPR1A | 0.3045 |
| PDIA3 | 0.5279 | TICAM2 | 0.4485 | ASL | 0.3975 | FOS | 0.3566 | AKAP2 | 0.3288 | NOP9 | 0.3045 |
| CD151 | 0.5278 | SH3BGRL3 | 0.4485 | IRAK1 | 0.3975 | ARSA | 0.3566 | FCGR3A | 0.3287 | AEN | 0.3044 |
| QSOX1 | 0.5277 | LGALS12 | 0.4485 | AP1B1 | 0.3975 | IL19 | 0.3565 | ATP11C | 0.3287 | RRAS | 0.3044 |
| PFKL | 0.5276 | CNN1 | 0.4483 | PACSIN3 | 0.3975 | KIAA1217 | 0.3565 | BPIFB3 | 0.3286 | CBLN4 | 0.3043 |
| CEMIP | 0.5274 | FOXK1 | 0.4480 | CASP7 | 0.3974 | POM121 | 0.3563 | DUSP27 | 0.3286 | DHX16 | 0.3043 |
| NOD1 | 0.5266 | ITGA7 | 0.4479 | C16orf72 | 0.3973 | QTRT2 | 0.3562 | ZNF628 | 0.3284 | DMBT1 | 0.3043 |
| GUSB | 0.5262 | EGR2 | 0.4472 | NRIP1 | 0.3972 | PALLD | 0.3561 | AC008878.2 | 0.3284 | STYX | 0.3042 |
| B4GALT1 | 0.5258 | ZDHHC9 | 0.4470 | BACH1 | 0.3966 | DNAJC22 | 0.3558 | FKBP14 | 0.3283 | BAG3 | 0.3041 |
| PIGT | 0.5256 | SLC38A10 | 0.4469 | RHBDF2 | 0.3966 | TMEM200B | 0.3556 | DOK2 | 0.3283 | CCDC61 | 0.3041 |
| RRBP1 | 0.5253 | AIFM2 | 0.4469 | FAM120A | 0.3965 | ANK1 | 0.3555 | SYVN1 | 0.3282 | S100A5 | 0.3041 |
| DCUN1D3 | 0.5252 | FAM20A | 0.4467 | SPATA13 | 0.3964 | NF2 | 0.3555 | IL36B | 0.3282 | CAB39 | 0.3040 |
| PODNL1 | 0.5248 | CD14 | 0.4465 | RHOJ | 0.3964 | ACTG2 | 0.3553 | PDE1C | 0.3281 | STEAP4 | 0.3040 |
| PHLDA3 | 0.5244 | IER5 | 0.4465 | FBLN5 | 0.3963 | DPY19L3 | 0.3553 | RNF144B | 0.3281 | PRB3 | 0.3040 |
| EHD4 | 0.5243 | SNED1 | 0.4463 | UGP2 | 0.3963 | SLAIN2 | 0.3552 | HAPLN3 | 0.3280 | CANX | 0.3037 |
| ECE1 | 0.5241 | SPRY1 | 0.4462 | NACC1 | 0.3962 | CMIP | 0.3551 | DUSP6 | 0.3280 | KLHL30 | 0.3036 |
| ELF4 | 0.5238 | ADAMTS2 | 0.4460 | HIPK3 | 0.3962 | EXT1 | 0.3549 | PDLIM4 | 0.3280 | S100A6 | 0.3036 |
| SRF | 0.5234 | SEL1L3 | 0.4459 | TCHH | 0.3959 | MPZL3 | 0.3549 | MMP10 | 0.3279 | NDST1 | 0.3035 |
| SEC24D | 0.5234 | KRT80 | 0.4459 | RGS16 | 0.3959 | CCR8 | 0.3549 | NPR2 | 0.3279 | MCAM | 0.3035 |
| MYD88 | 0.5232 | ASGR2 | 0.4457 | UGCG | 0.3958 | CTDP1 | 0.3548 | TULP2 | 0.3278 | TTC38 | 0.3035 |
| MXRA5 | 0.5226 | FMNL1 | 0.4455 | PTK7 | 0.3957 | IGFBP4 | 0.3548 | TRIP4 | 0.3278 | RAET1L | 0.3034 |
| P4HA2 | 0.5223 | MTMR11 | 0.4453 | ULBP3 | 0.3956 | COL27A1 | 0.3548 | CHI3L2 | 0.3278 | GGT6 | 0.3034 |
| IFNAR1 | 0.5222 | DRAM1 | 0.4448 | CIDEB | 0.3951 | GSC | 0.3548 | RILPL1 | 0.3278 | YTHDF1 | 0.3034 |
| SIPA1 | 0.5220 | CAPN2 | 0.4448 | CHST3 | 0.3947 | SHH | 0.3547 | NRBP1 | 0.3277 | ANKH | 0.3033 |
| ITPRIPL2 | 0.5219 | PHC2 | 0.4448 | ASCC2 | 0.3946 | ABCC1 | 0.3544 | AOC3 | 0.3276 | OSGIN1 | 0.3033 |
| PHLDA2 | 0.5218 | GCKR | 0.4446 | JADE2 | 0.3946 | WAS | 0.3544 | NLN | 0.3275 | ARHGEF40 | 0.3033 |
| FEM1C | 0.5216 | RAB3IL1 | 0.4446 | HCAR2 | 0.3945 | OR9A4 | 0.3544 | MYO5B | 0.3275 | DNASE2 | 0.3033 |
| PML | 0.5216 | DOK7 | 0.4446 | B4GALT5 | 0.3944 | TBL2 | 0.3542 | HLA-B | 0.3275 | WNT3A | 0.3033 |
| TRIM56 | 0.5215 | ANO1 | 0.4444 | TRIOBP | 0.3943 | MDK | 0.3541 | MFSD6L | 0.3274 | SLK | 0.3033 |
| PCSK5 | 0.5214 | SLC4A7 | 0.4444 | DPP7 | 0.3939 | EREG | 0.3541 | SPATA20 | 0.3273 | PTGR1 | 0.3032 |
| RAB43 | 0.5214 | SOAT1 | 0.4442 | UACA | 0.3938 | GBA | 0.3540 | GLUL | 0.3273 | FAP | 0.3032 |
| THBS1 | 0.5212 | BIRC3 | 0.4436 | HILPDA | 0.3937 | HIF1A | 0.3540 | MTFP1 | 0.3273 | EFEMP1 | 0.3032 |
| SEC61A1 | 0.5209 | ABCA1 | 0.4435 | AHNAK | 0.3937 | CCR5 | 0.3539 | TRIM15 | 0.3272 | AC137834.1 | 0.3031 |
| COL1A1 | 0.5207 | P4HA1 | 0.4434 | PMP22 | 0.3935 | DENND1C | 0.3539 | PGM2 | 0.3271 | PIK3CG | 0.3031 |
| FKBP10 | 0.5205 | ST8SIA4 | 0.4434 | SERPINA3 | 0.3935 | CD300C | 0.3539 | ENTPD7 | 0.3271 | SIGLECL1 | 0.3031 |
| C1S | 0.5205 | CACNA2D4 | 0.4433 | TUBB6 | 0.3935 | MFHAS1 | 0.3539 | SLC16A10 | 0.3269 | ETV3L | 0.3030 |
| VCL | 0.5198 | CCL20 | 0.4433 | RAG1 | 0.3935 | ARHGAP1 | 0.3538 | IL1B | 0.3268 | PPIB | 0.3030 |
| EPHB4 | 0.5198 | POTEE | 0.4431 | ADORA1 | 0.3934 | SLC22A18AS | 0.3538 | VNN3 | 0.3268 | HAL | 0.3029 |
| LMAN1 | 0.5197 | LMLN | 0.4431 | DIRAS3 | 0.3934 | ERN1 | 0.3536 | PCK2 | 0.3266 | DCTD | 0.3029 |
| NUDT19 | 0.5196 | CASZ1 | 0.4428 | CTDSP1 | 0.3931 | CAPN12 | 0.3536 | GPRIN3 | 0.3265 | MAB21L1 | 0.3026 |
| KHNYN | 0.5192 | IL11 | 0.4423 | EVC2 | 0.3931 | TMX3 | 0.3535 | MFSD14B | 0.3265 | AP3B1 | 0.3026 |
| TBXA2R | 0.5192 | IBSP | 0.4422 | SIDT2 | 0.3930 | LCP1 | 0.3535 | RAB11FIP1 | 0.3265 | NCK2 | 0.3025 |
| SNX8 | 0.5192 | SEL1L | 0.4422 | TMEM255B | 0.3930 | ATP13A1 | 0.3534 | EGF | 0.3263 | FOLR3 | 0.3025 |
| TPM4 | 0.5189 | B3GNT8 | 0.4421 | RAI14 | 0.3929 | CXCL16 | 0.3533 | ZBTB1 | 0.3262 | PPL | 0.3025 |
| TOR4A | 0.5188 | CMTM3 | 0.4420 | POTEJ | 0.3929 | PRRX1 | 0.3533 | SLC25A47 | 0.3262 | MCM3AP | 0.3023 |
| GNA15 | 0.5183 | CSF3 | 0.4417 | GJB3 | 0.3924 | EIF2S3B | 0.3532 | DTX3L | 0.3262 | SERPINB3 | 0.3022 |
| PODXL | 0.5181 | CREB3L2 | 0.4416 | IGF2R | 0.3923 | RNASE4 | 0.3532 | TMEM236 | 0.3262 | NUFIP2 | 0.3022 |
| ABCC3 | 0.5180 | DOK3 | 0.4412 | ALOX5AP | 0.3923 | LILRA6 | 0.3532 | WASF2 | 0.3262 | YDJC | 0.3021 |
| GAA | 0.5176 | MYO9B | 0.4412 | S100A10 | 0.3920 | MANF | 0.3531 | ADGRE1 | 0.3260 | NT5E | 0.3021 |
| TAPBP | 0.5173 | CTSD | 0.4410 | RUNX2 | 0.3917 | CUL1 | 0.3530 | EGFL6 | 0.3260 | ARMC9 | 0.3021 |
| CELSR1 | 0.5170 | PI3 | 0.4409 | RPN2 | 0.3916 | ARAP3 | 0.3527 | RAB8A | 0.3259 | BCL2L2 | 0.3021 |
| ZDHHC5 | 0.5168 | JAK3 | 0.4409 | SPINT1 | 0.3916 | HAS2 | 0.3527 | RAB15 | 0.3259 | FILIP1L | 0.3021 |
| NXF3 | 0.5153 | NAGPA | 0.4408 | CD2AP | 0.3915 | PPM1J | 0.3526 | AL591806.3 | 0.3259 | NOTCH2 | 0.3021 |
| LAMB2 | 0.5150 | CLIP1 | 0.4406 | FUT7 | 0.3913 | AREL1 | 0.3526 | STIM1 | 0.3258 | VGLL4 | 0.3021 |
| NFIC | 0.5150 | EIF3B | 0.4405 | ELL2 | 0.3913 | NKX3-1 | 0.3526 | CRACR2B | 0.3257 | GOLGA8Q | 0.3020 |
| SLC35E4 | 0.5143 | TOM1 | 0.4405 | LAMA2 | 0.3912 | MAP3K11 | 0.3526 | ACP6 | 0.3257 | GAS7 | 0.3019 |
| CLDN23 | 0.5142 | PPARD | 0.4405 | MMP11 | 0.3911 | TNFAIP8 | 0.3525 | SYNJ2 | 0.3256 | DOHH | 0.3018 |
| HSPA6 | 0.5140 | AEBP1 | 0.4400 | ITGA4 | 0.3909 | SBK3 | 0.3523 | CD300LD | 0.3256 | SAT1 | 0.3018 |
| S100A11 | 0.5137 | LILRB3 | 0.4399 | AC068580.4 | 0.3909 | AQP3 | 0.3522 | FAM50A | 0.3254 | ADH4 | 0.3018 |
| LMF2 | 0.5136 | PFKFB4 | 0.4399 | NES | 0.3908 | PGK1 | 0.3520 | CSPG4 | 0.3252 | TRPC7 | 0.3017 |
| GYS1 | 0.5134 | DNAAF5 | 0.4398 | ARNT | 0.3907 | NBEAL2 | 0.3519 | CD70 | 0.3252 | VKORC1L1 | 0.3016 |
| KCNN4 | 0.5134 | LRRC25 | 0.4397 | LILRB2 | 0.3907 | KCNJ15 | 0.3519 | RENBP | 0.3250 | HABP2 | 0.3016 |
| ARSI | 0.5130 | PTPN1 | 0.4397 | TNFRSF9 | 0.3905 | XDH | 0.3518 | TMEM104 | 0.3250 | SAV1 | 0.3016 |
| KLF17 | 0.5128 | CNIH3 | 0.4397 | SOAT2 | 0.3905 | XIRP1 | 0.3515 | CCDC71L | 0.3250 | STT3B | 0.3016 |
| LSP1 | 0.5118 | DMRTA2 | 0.4396 | CHST14 | 0.3900 | SLC52A2 | 0.3514 | NUB1 | 0.3250 | TFG | 0.3016 |
| HIC1 | 0.5116 | CCL7 | 0.4394 | TES | 0.3899 | ACBD3 | 0.3514 | MFGE8 | 0.3249 | TCL1A | 0.3016 |
| SIPA1L1 | 0.5113 | PIM3 | 0.4394 | KDM2A | 0.3899 | SH2D3A | 0.3512 | KCTD10 | 0.3248 | SERPINB5 | 0.3016 |
| ADGRE2 | 0.5110 | C1QTNF1 | 0.4394 | ZNF324B | 0.3898 | BCL6 | 0.3512 | ARNTL2 | 0.3247 | UAP1L1 | 0.3015 |
| ERRFI1 | 0.5108 | MUC1 | 0.4392 | RASA3 | 0.3897 | OBSL1 | 0.3510 | B3GNT7 | 0.3246 | FXYD5 | 0.3015 |
| PLEKHG1 | 0.5107 | MARCO | 0.4392 | ELMOD1 | 0.3894 | ALDH16A1 | 0.3510 | GAP43 | 0.3246 | RIC8A | 0.3015 |
| CRISPLD2 | 0.5105 | PCNX1 | 0.4391 | MICALL1 | 0.3894 | ANTXR2 | 0.3509 | EDA2R | 0.3245 | FAT1 | 0.3015 |
| SDF4 | 0.5098 | GBP2 | 0.4391 | EML1 | 0.3893 | FCHSD1 | 0.3509 | STK24 | 0.3244 | CHST11 | 0.3012 |
| MANBA | 0.5097 | TUT7 | 0.4390 | C11orf24 | 0.3892 | SHB | 0.3508 | HCK | 0.3243 | CRB2 | 0.3012 |
| TSKU | 0.5086 | TFE3 | 0.4390 | B3GNT5 | 0.3891 | NIPA2 | 0.3508 | LAMP3 | 0.3243 | NRBF2 | 0.3011 |
| PRICKLE3 | 0.5081 | VPS18 | 0.4389 | ARPC1A | 0.3889 | DHX37 | 0.3506 | TNFAIP6 | 0.3243 | CLN3 | 0.3011 |
| SECTM1 | 0.5081 | FERMT3 | 0.4387 | ZC3HAV1 | 0.3888 | CD300LB | 0.3506 | TBATA | 0.3242 | AICDA | 0.3011 |
| CPD | 0.5077 | SLC12A9 | 0.4387 | POTEI | 0.3888 | LUM | 0.3506 | ICAM3 | 0.3240 | ENTPD5 | 0.3010 |
| CAST | 0.5077 | SLC39A13 | 0.4387 | TMEM131 | 0.3886 | INTS1 | 0.3505 | TP53I13 | 0.3240 | SCNN1A | 0.3010 |
| FBLN7 | 0.5068 | MCHR1 | 0.4384 | SEC31A | 0.3885 | AMPD2 | 0.3505 | TUBA1C | 0.3240 | NLGN4X | 0.3010 |
| OSBPL5 | 0.5066 | RNF24 | 0.4384 | ICMT | 0.3883 | STT3A | 0.3504 | TMEM106A | 0.3238 | CCDC200 | 0.3010 |
| TNFRSF10D | 0.5066 | RASSF8 | 0.4381 | IER3 | 0.3883 | TNS1 | 0.3503 | CYTH3 | 0.3238 | CMKLR1 | 0.3010 |
| MAN2B2 | 0.5060 | CTSL | 0.4380 | UAP1 | 0.3883 | FAM234A | 0.3503 | CMYA5 | 0.3238 | FAM71A | 0.3009 |
| PLIN2 | 0.5055 | COL12A1 | 0.4377 | ANKRD52 | 0.3883 | INHBA | 0.3502 | BAZ1B | 0.3237 | ARHGEF18 | 0.3009 |
| RPS6KA3 | 0.5054 | SCG2 | 0.4374 | NCF2 | 0.3882 | EMB | 0.3502 | RBPMS | 0.3236 | SMIM15 | 0.3009 |
| CYR61 | 0.5053 | VWA1 | 0.4374 | ELOVL6 | 0.3880 | PALM3 | 0.3502 | TMC8 | 0.3236 | PRSS2 | 0.3008 |
| PTGS2 | 0.5049 | TYMP | 0.4373 | USB1 | 0.3878 | ANKRD9 | 0.3502 | DNAJC10 | 0.3235 | PADI1 | 0.3008 |
| CTSZ | 0.5046 | CNN2 | 0.4373 | S100A9 | 0.3878 | CCL26 | 0.3502 | FAM84A | 0.3235 | CYBB | 0.3008 |
| SERPINB8 | 0.5045 | POU2F3 | 0.4372 | TNFRSF10C | 0.3876 | MYO1B | 0.3502 | ABCA4 | 0.3235 | OR2B11 | 0.3008 |
| PIM1 | 0.5043 | IL27RA | 0.4369 | TNFRSF10A | 0.3876 | OLFML2B | 0.3500 | MMP7 | 0.3235 | KISS1R | 0.3007 |
| ZNF395 | 0.5042 | SNAI1 | 0.4366 | FFAR3 | 0.3871 | MCUB | 0.3498 | TBC1D8B | 0.3234 | TNPO3 | 0.3007 |
| CANT1 | 0.5042 | F13A1 | 0.4361 | ARHGAP9 | 0.3870 | S100A8 | 0.3498 | CC2D1B | 0.3234 | CSTB | 0.3006 |
| BCKDK | 0.5041 | PLD3 | 0.4360 | ACTA2 | 0.3866 | INSRR | 0.3498 | FAM78B | 0.3233 | ZNF264 | 0.3006 |
| KDELC2 | 0.5035 | SLC2A4RG | 0.4358 | VPS37C | 0.3862 | DAGLB | 0.3497 | MYC | 0.3232 | SRGAP2 | 0.3005 |
| VEGFA | 0.5034 | INF2 | 0.4357 | SLC49A3 | 0.3861 | CHID1 | 0.3496 | SPINK6 | 0.3232 | GMEB2 | 0.3004 |
| FZD1 | 0.5030 | SEPHS2 | 0.4357 | ERICH1 | 0.3858 | MCEMP1 | 0.3496 | TNFAIP8L1 | 0.3231 | EP300 | 0.3001 |
| FRMD8 | 0.5029 | LUZP1 | 0.4356 | NOM1 | 0.3856 | TMEM61 | 0.3495 | ZNF408 | 0.3231 | CABIN1 | 0.3000 |
| IGDCC4 | 0.5027 | GNAI2 | 0.4353 | SEC23A | 0.3853 |  |  |  |  |  |  |

CGGA GBM RNA-seq datasets (r value, Pearson correlation)

| Genes | r value | Genes | r value | Genes | r value | Genes | r value | Genes | r value | Genes | r value |
| --- | --- | --- | --- | --- | --- | --- | --- | --- | --- | --- | --- |
| FAM20C | 1.0000 | IGFBP6 | 0.5561 | SDF2 | 0.4753 | PALM3 | 0.4227 | CD83 | 0.3757 | RP11-689K5.3 | 0.3379 |
| CLIC1 | 0.8388 | ACTG1 | 0.5561 | POLM | 0.4752 | SNRPF | 0.4227 | NCSTN | 0.3756 | RP11-33O4.1 | 0.3379 |
| TNFRSF1A | 0.8227 | RP11-295G20.2 | 0.5561 | RRAGC | 0.4751 | ACTA2-AS1 | 0.4227 | TAF9 | 0.3756 | C19orf82 | 0.3379 |
| TIMP1 | 0.8167 | RUNX2 | 0.5561 | UBE2S | 0.4751 | AC002055.4 | 0.4226 | ATG7 | 0.3755 | HGS | 0.3378 |
| CD151 | 0.8106 | CD81 | 0.5560 | LRWD1 | 0.4750 | RAB3D | 0.4226 | TRIM4 | 0.3754 | TIMMDC1 | 0.3378 |
| C1R | 0.8065 | NEK6 | 0.5558 | WARS2 | 0.4750 | SHMT1 | 0.4225 | GAS8 | 0.3754 | FOPNL | 0.3377 |
| ANXA2 | 0.8031 | DTYMK | 0.5558 | IGKC | 0.4748 | FZR1 | 0.4225 | RASSF8-AS1 | 0.3754 | ATP6V0D2 | 0.3377 |
| CALR | 0.7984 | UROD | 0.5558 | ZNF622 | 0.4748 | FRMD8 | 0.4225 | RPL6 | 0.3752 | CRYBB2P1 | 0.3377 |
| CHPF2 | 0.7878 | SSBP4 | 0.5557 | AL626787.1 | 0.4747 | ZNF700 | 0.4225 | APOA1BP | 0.3752 | PLD2 | 0.3377 |
| LGALS1 | 0.7862 | ARHGEF1 | 0.5557 | GAR1 | 0.4747 | ZAP70 | 0.4225 | WDR61 | 0.3751 | RP1-199J3.5 | 0.3377 |
| ZYX | 0.7833 | CDK2AP2 | 0.5557 | ZNF526 | 0.4747 | NAT10 | 0.4222 | TMEM199 | 0.3750 | CTC-228N24.3 | 0.3377 |
| PLP2 | 0.7820 | RP11-161H23.5 | 0.5556 | RP11-622K12.1 | 0.4746 | TRAF1 | 0.4220 | HOXD10 | 0.3750 | SF3A2 | 0.3377 |
| SERTAD1 | 0.7809 | RPA3 | 0.5556 | OSM | 0.4746 | ZNHIT2 | 0.4220 | PARP4 | 0.3749 | UBE2D4 | 0.3376 |
| BCL3 | 0.7804 | MAFB | 0.5556 | NEDD9 | 0.4746 | TOMM6 | 0.4219 | GSK3A | 0.3748 | STRA13 | 0.3376 |
| HSD3B7 | 0.7767 | RGS16 | 0.5555 | SLC38A10 | 0.4745 | TMED10 | 0.4219 | TRBC2 | 0.3747 | CETP | 0.3376 |
| UPP1 | 0.7764 | SLC35F6 | 0.5555 | TMUB2 | 0.4745 | RPL10A | 0.4219 | DYNLL1-AS1 | 0.3747 | SPCS2 | 0.3375 |
| FLNA | 0.7763 | IL18 | 0.5553 | LPXN | 0.4745 | HMGN2 | 0.4219 | TMEM44 | 0.3747 | C12orf52 | 0.3375 |
| EMP3 | 0.7762 | POLR1D | 0.5553 | KEAP1 | 0.4745 | MESDC1 | 0.4219 | GRK5 | 0.3747 | CCDC104 | 0.3375 |
| RELB | 0.7739 | NSUN5 | 0.5553 | RRAD | 0.4744 | ANXA2R | 0.4218 | RP11-326C3.2 | 0.3746 | LACTB2 | 0.3374 |
| CD63 | 0.7728 | PMM2 | 0.5553 | FAM57A | 0.4744 | SGK223 | 0.4218 | C4BPB | 0.3745 | TOMM22 | 0.3374 |
| P4HB | 0.7713 | GGCT | 0.5552 | HS1BP3 | 0.4742 | METTL18 | 0.4218 | PDZD11 | 0.3745 | SCRN2 | 0.3373 |
| TGFBI | 0.7704 | CCL5 | 0.5552 | CRELD1 | 0.4742 | CBWD6 | 0.4218 | TDP2 | 0.3744 | ARG2 | 0.3373 |
| LINC00152 | 0.7686 | C10orf11 | 0.5551 | FAM159A | 0.4741 | RPP21 | 0.4218 | MUS81 | 0.3744 | CTDSPL | 0.3372 |
| S100A4 | 0.7679 | PTBP1 | 0.5551 | BFAR | 0.4741 | HEYL | 0.4218 | RAB8A | 0.3744 | RP4-794H19.1 | 0.3372 |
| PLAUR | 0.7669 | GYPC | 0.5550 | EDF1 | 0.4740 | CCDC57 | 0.4217 | C1orf123 | 0.3744 | GLYCTK | 0.3372 |
| TAGLN2 | 0.7668 | PAM | 0.5548 | RPS26 | 0.4739 | TRMT61A | 0.4217 | PLXNA1 | 0.3744 | HARS2 | 0.3371 |
| LMNA | 0.7660 | MIR24-2 | 0.5547 | MAP7D3 | 0.4739 | MAP7D1 | 0.4217 | RPL17P50 | 0.3743 | TTLL4 | 0.3371 |
| PLOD1 | 0.7645 | CD74 | 0.5547 | POM121L9P | 0.4739 | CTC-241F20.3 | 0.4217 | STX18 | 0.3741 | CNBP | 0.3370 |
| EHD2 | 0.7632 | SLC35C2 | 0.5545 | GRB10 | 0.4738 | PLEKHJ1 | 0.4216 | CENPM | 0.3741 | C9orf50 | 0.3370 |
| MRC2 | 0.7628 | DOK3 | 0.5545 | TRIB1 | 0.4738 | PTMS | 0.4216 | TMOD3 | 0.3740 | CCS | 0.3370 |
| PLOD3 | 0.7617 | ERO1L | 0.5545 | PSMD6 | 0.4737 | DYNLL1 | 0.4216 | ERCC2 | 0.3740 | RP11-34P13.15 | 0.3369 |
| EFEMP2 | 0.7598 | OST4 | 0.5544 | PDAP1 | 0.4737 | MAGT1 | 0.4215 | NOTCH4 | 0.3740 | C19orf35 | 0.3369 |
| SERTAD3 | 0.7580 | C1QC | 0.5538 | AP5S1 | 0.4736 | CTDNEP1 | 0.4213 | LBX2 | 0.3740 | CTD-2020K17.4 | 0.3369 |
| S100A11 | 0.7570 | RBMS1 | 0.5538 | RIOK3 | 0.4736 | C8orf48 | 0.4213 | SNHG16 | 0.3740 | MYBBP1A | 0.3369 |
| MAP2K3 | 0.7569 | PABPC4 | 0.5536 | C1GALT1C1 | 0.4735 | PHKG2 | 0.4212 | LINC00908 | 0.3739 | TERT | 0.3369 |
| NUCB1 | 0.7567 | NADK | 0.5533 | SNX9 | 0.4734 | ANO10 | 0.4212 | MTHFSD | 0.3739 | CLEC4E | 0.3368 |
| MIR4435-1HG | 0.7560 | COPS6 | 0.5532 | TRPT1 | 0.4732 | EMC1 | 0.4212 | AGFG2 | 0.3739 | THBS4 | 0.3368 |
| MVP | 0.7552 | SYTL3 | 0.5531 | EFCAB4A | 0.4730 | RP11-848P1.9 | 0.4211 | RP4-607I7.1 | 0.3739 | BLOC1S5 | 0.3367 |
| HEXB | 0.7552 | TRABD | 0.5531 | RP3-393E18.2 | 0.4729 | FAM103A1 | 0.4211 | RPLP0P2 | 0.3739 | C11orf45 | 0.3366 |
| ITPKC | 0.7548 | KRT8P12 | 0.5531 | OSER1 | 0.4729 | GPBAR1 | 0.4211 | YRDC | 0.3738 | CTC-510F12.6 | 0.3366 |
| TMED9 | 0.7541 | ZNF837 | 0.5530 | SMPD2 | 0.4728 | NAT1 | 0.4210 | C1orf228 | 0.3738 | PDGFC | 0.3366 |
| ARID5A | 0.7520 | STAC3 | 0.5530 | IGHG2 | 0.4727 | LOXL4 | 0.4210 | ACOT13 | 0.3737 | NFKBIL1 | 0.3365 |
| CD276 | 0.7520 | ODF3B | 0.5529 | C11orf31 | 0.4726 | GLG1 | 0.4209 | HINT1 | 0.3737 | HNRNPC | 0.3365 |
| CTSL | 0.7520 | HIVEP3 | 0.5529 | CREB3 | 0.4726 | ADRBK1 | 0.4209 | HLA-DOA | 0.3736 | SULF1 | 0.3364 |
| METRNL | 0.7519 | CYP19A1 | 0.5529 | TMEM39B | 0.4726 | CTA-384D8.36 | 0.4209 | RPL23 | 0.3736 | TBC1D20 | 0.3364 |
| RUNX1 | 0.7511 | MRPS24 | 0.5528 | ACPP | 0.4726 | ICT1 | 0.4208 | HOXB-AS1 | 0.3736 | ZNF707 | 0.3364 |
| EDEM2 | 0.7511 | MOV10 | 0.5527 | NUCB2 | 0.4725 | SIGLEC10 | 0.4207 | TRAF5 | 0.3735 | CCDC80 | 0.3363 |
| PRR24 | 0.7507 | GPR4 | 0.5526 | POM121C | 0.4725 | ZNF777 | 0.4207 | DXO | 0.3734 | CD2AP | 0.3363 |
| NNMT | 0.7501 | ERCC1 | 0.5525 | CTC-205M6.5 | 0.4725 | NDUFAF3 | 0.4207 | SERPINB9 | 0.3734 | RPS21 | 0.3362 |
| CTSB | 0.7490 | ULBP2 | 0.5524 | NAPSB | 0.4725 | HOXB6 | 0.4207 | LSG1 | 0.3734 | TNFSF8 | 0.3361 |
| PVRL2 | 0.7489 | TAF10 | 0.5524 | UBD | 0.4724 | C18orf8 | 0.4207 | IL12RB1 | 0.3733 | TPRKB | 0.3361 |
| PPP1R18 | 0.7469 | MYCBP | 0.5522 | ADAM8 | 0.4724 | SIDT2 | 0.4207 | DHODH | 0.3733 | STAU1 | 0.3361 |
| EMILIN1 | 0.7457 | MARCO | 0.5522 | B3GNT9 | 0.4724 | HOXD11 | 0.4207 | SELO | 0.3732 | D2HGDH | 0.3361 |
| S100A10 | 0.7436 | MYH9 | 0.5521 | ARRB2 | 0.4724 | SNHG15 | 0.4206 | SMAD5-AS1 | 0.3732 | NUDT16L1 | 0.3361 |
| AC005789.11 | 0.7421 | TRAPPC2P1 | 0.5519 | RP11-274E7.2 | 0.4723 | MRPL27 | 0.4206 | TRAM1 | 0.3732 | RP11-14N7.2 | 0.3360 |
| HSPB1 | 0.7416 | CASP6 | 0.5519 | CISD3 | 0.4723 | ZNF446 | 0.4205 | LAMTOR1 | 0.3732 | ADPRM | 0.3359 |
| IGFBP2 | 0.7404 | OSGIN1 | 0.5519 | ENY2 | 0.4723 | DIABLO | 0.4205 | RP11-141O15.1 | 0.3732 | SPATA17 | 0.3359 |
| CASP4 | 0.7403 | CORO1A | 0.5518 | SRXN1 | 0.4722 | ANP32B | 0.4205 | PHTF1 | 0.3732 | NUDT5 | 0.3358 |
| ISG20 | 0.7397 | HP | 0.5517 | KIF9 | 0.4721 | IFNAR1 | 0.4205 | IL13RA2 | 0.3731 | STT3B | 0.3357 |
| LGALS3 | 0.7395 | FAM46B | 0.5517 | RP4-758J18.2 | 0.4721 | GSTM4 | 0.4205 | ZSCAN5A | 0.3731 | RP11-20I20.4 | 0.3357 |
| PLEKHA4 | 0.7393 | TBRG4 | 0.5517 | LILRB1 | 0.4721 | NADSYN1 | 0.4204 | C8orf56 | 0.3731 | RP1-130H16.16 | 0.3357 |
| TGFB1 | 0.7386 | STAT3 | 0.5517 | SMIM10 | 0.4720 | RP11-399O19.9 | 0.4204 | ATF7 | 0.3730 | RXRA | 0.3357 |
| SBNO2 | 0.7372 | POLR2H | 0.5514 | TBX15 | 0.4720 | SOCS2 | 0.4204 | CTD-3187F8.14 | 0.3730 | PPHLN1 | 0.3356 |
| PLAU | 0.7371 | AGPAT6 | 0.5514 | POLD1 | 0.4720 | CUTA | 0.4204 | ZNF345 | 0.3730 | MKS1 | 0.3356 |
| SPAG4 | 0.7371 | TBXAS1 | 0.5513 | GMIP | 0.4719 | PSMD2 | 0.4203 | BICC1 | 0.3730 | ZNF57 | 0.3355 |
| FOSL1 | 0.7370 | VAV1 | 0.5512 | MRPL11 | 0.4717 | ADAM15 | 0.4203 | EI24 | 0.3729 | ZBTB25 | 0.3354 |
| PTRF | 0.7370 | DHX37 | 0.5511 | TRIM5 | 0.4716 | COL8A1 | 0.4203 | DPAGT1 | 0.3727 | ANKRD9 | 0.3354 |
| ARPC1B | 0.7327 | PSMC2 | 0.5511 | MNDA | 0.4716 | INF2 | 0.4202 | CYBRD1 | 0.3727 | SEC11C | 0.3354 |
| IFI30 | 0.7322 | PELO | 0.5511 | COMMD1 | 0.4716 | ZNF511 | 0.4201 | RP11-363E6.4 | 0.3727 | NFU1 | 0.3354 |
| IFNGR2 | 0.7322 | KXD1 | 0.5510 | GCKR | 0.4715 | MED25 | 0.4200 | PMFBP1 | 0.3727 | ELAC2 | 0.3353 |
| LMAN2 | 0.7320 | PLS3 | 0.5509 | MTCH2 | 0.4715 | CPA4 | 0.4200 | CHRAC1 | 0.3727 | C19orf47 | 0.3352 |
| BGN | 0.7317 | SPNS1 | 0.5507 | C21orf62 | 0.4714 | RAD9A | 0.4200 | ELAC1 | 0.3727 | MOK | 0.3350 |
| C19orf10 | 0.7316 | ZDHHC4 | 0.5504 | IL17RA | 0.4714 | CIZ1 | 0.4199 | SSSCA1 | 0.3725 | NDNL2 | 0.3350 |
| COL6A1 | 0.7313 | MVB12A | 0.5503 | A4GALT | 0.4713 | AC009469.1 | 0.4199 | TRMT2A | 0.3725 | ACOT2 | 0.3350 |
| VAMP5 | 0.7304 | LAMC1 | 0.5503 | CAV2 | 0.4711 | CERKL | 0.4199 | RP11-732A19.5 | 0.3725 | AC034228.7 | 0.3350 |
| VKORC1 | 0.7303 | ABI3 | 0.5502 | C1orf50 | 0.4709 | AFAP1L1 | 0.4199 | S1PR4 | 0.3724 | DPY19L1 | 0.3350 |
| SAT1 | 0.7290 | HILPDA | 0.5502 | PABPC1L | 0.4709 | RPS14P3 | 0.4197 | NRAS | 0.3724 | VASH1 | 0.3349 |
| FHL3 | 0.7285 | IL2RG | 0.5502 | APH1A | 0.4709 | NOM1 | 0.4197 | GPX3 | 0.3724 | REXO4 | 0.3349 |
| COL6A2 | 0.7281 | TOMM40 | 0.5501 | WBSCR27 | 0.4709 | GZMH | 0.4197 | SCNN1G | 0.3722 | HVCN1 | 0.3348 |
| AC010441.1 | 0.7274 | LTF | 0.5501 | ADAM9 | 0.4708 | AC016747.3 | 0.4197 | RP11-395P17.11 | 0.3722 | CMC4 | 0.3348 |
| CEBPD | 0.7270 | MIR22HG | 0.5501 | CHCHD5 | 0.4707 | UBXN6 | 0.4197 | ATP8B1 | 0.3722 | ENO2 | 0.3347 |
| AC093673.5 | 0.7259 | ACTG2 | 0.5499 | ATP13A1 | 0.4705 | PPT1 | 0.4196 | IL21R | 0.3722 | POLDIP2 | 0.3347 |
| MAPKAPK2 | 0.7257 | SHFM1 | 0.5498 | IFT122 | 0.4705 | SRP68 | 0.4195 | RECQL4 | 0.3722 | ACOT8 | 0.3347 |
| RRBP1 | 0.7256 | RHOA | 0.5497 | CTD-2201E18.3 | 0.4703 | UBE2L3 | 0.4194 | STX8 | 0.3721 | RP11-299J3.8 | 0.3347 |
| RRAS | 0.7246 | BCL7C | 0.5497 | PKN1 | 0.4702 | H2AFZ | 0.4193 | DCN | 0.3721 | SMC5 | 0.3347 |
| SLC10A3 | 0.7244 | ACADS | 0.5497 | PRCC | 0.4700 | RPLP1 | 0.4192 | CDK11A | 0.3721 | MLF1 | 0.3347 |
| SERPINA1 | 0.7241 | ALOX5 | 0.5496 | HPS1 | 0.4699 | MLH3 | 0.4190 | CHMP3 | 0.3721 | MEGF8 | 0.3347 |
| PLK3 | 0.7220 | MXRA5 | 0.5494 | DNAJC17 | 0.4699 | ZNF580 | 0.4189 | IL27RA | 0.3721 | C3orf17 | 0.3346 |
| SSR3 | 0.7214 | TMEM43 | 0.5493 | WASF2 | 0.4698 | NELFE | 0.4189 | CLCC1 | 0.3720 | RP1-313I6.12 | 0.3346 |
| GRN | 0.7208 | TSPAN17 | 0.5493 | NFE2L2 | 0.4698 | SYAP1 | 0.4189 | HMCES | 0.3720 | SUMO2 | 0.3345 |
| MMP19 | 0.7208 | CD4 | 0.5491 | PPP1R16A | 0.4698 | POLR2I | 0.4189 | TMEM204 | 0.3720 | LAMA2 | 0.3345 |
| CTB-25B13.12 | 0.7206 | LRCH4 | 0.5490 | GALNT4 | 0.4697 | GNPDA1 | 0.4188 | NOS3 | 0.3719 | PPP1R7 | 0.3345 |
| TRIP10 | 0.7205 | PTPN18 | 0.5488 | DALRD3 | 0.4697 | YBX1 | 0.4188 | DMWD | 0.3719 | CBWD2 | 0.3344 |
| SLC16A3 | 0.7204 | EIF1AD | 0.5487 | TTC7A | 0.4697 | IMPDH2 | 0.4188 | SETD1A | 0.3718 | UBALD1 | 0.3344 |
| KDELR2 | 0.7201 | TPM3 | 0.5486 | DHX58 | 0.4696 | SLC25A43 | 0.4187 | FIZ1 | 0.3718 | MXD3 | 0.3344 |
| GBP2 | 0.7198 | TRNAU1AP | 0.5483 | ZNF330 | 0.4695 | TUBB4B | 0.4186 | RP5-1198O20.4 | 0.3718 | MRPS7 | 0.3344 |
| TNIP1 | 0.7192 | CD37 | 0.5483 | RGS10 | 0.4695 | PGD | 0.4185 | PMM1 | 0.3718 | ASB9 | 0.3343 |
| IFITM3 | 0.7190 | DAP3 | 0.5483 | CCDC102B | 0.4693 | ATP5G3 | 0.4184 | PODXL | 0.3717 | RP13-131K19.6 | 0.3343 |
| MGAT1 | 0.7183 | MLX | 0.5482 | PCBP1 | 0.4693 | PTPLAD2 | 0.4183 | BBS5 | 0.3717 | APCDD1L | 0.3343 |
| MDK | 0.7180 | MAP3K7CL | 0.5480 | AC074212.5 | 0.4692 | LGALS8 | 0.4183 | WDR90 | 0.3717 | HERC5 | 0.3343 |
| CHPF | 0.7179 | PSENEN | 0.5480 | RPS5 | 0.4692 | FOXN3-AS1 | 0.4182 | CECR1 | 0.3717 | NDUFS7 | 0.3343 |
| ASL | 0.7172 | NLRC4 | 0.5479 | NIP7 | 0.4692 | MRPS18A | 0.4182 | PARP15 | 0.3717 | THAP1 | 0.3342 |
| TAGLN | 0.7170 | NRM | 0.5476 | MAN2B2 | 0.4692 | LINC00900 | 0.4181 | EXOC3 | 0.3716 | FARSB | 0.3340 |
| COL18A1 | 0.7168 | POLD2 | 0.5475 | AMDHD2 | 0.4692 | HYI | 0.4181 | CREB5 | 0.3716 | AC022007.5 | 0.3338 |
| TNFRSF12A | 0.7153 | XKR8 | 0.5475 | GK | 0.4691 | SPR | 0.4180 | NUBP2 | 0.3716 | HAS3 | 0.3338 |
| TMSB10 | 0.7147 | KIAA2013 | 0.5475 | SPARC | 0.4690 | RP11-8L8.2 | 0.4180 | RP11-36B6.1 | 0.3716 | AC040173.1 | 0.3338 |
| TRIP6 | 0.7145 | TSPAN9 | 0.5474 | COX14 | 0.4690 | ANKRD11 | 0.4177 | CSRNP1 | 0.3716 | TCEA2 | 0.3338 |
| PDLIM7 | 0.7142 | EHD4 | 0.5474 | RP11-288H12.4 | 0.4690 | LXN | 0.4177 | METAP2 | 0.3715 | TRMT44 | 0.3337 |
| C1orf85 | 0.7138 | MIF | 0.5473 | ELL2 | 0.4690 | DUSP6 | 0.4176 | TBP | 0.3715 | DAXX | 0.3337 |
| ENG | 0.7138 | PARP12 | 0.5472 | RNF216 | 0.4689 | RP3-508I15.21 | 0.4176 | LPP-AS2 | 0.3714 | NFYC | 0.3337 |
| ITGA5 | 0.7128 | PDLIM4 | 0.5471 | TMEM87B | 0.4689 | CRISPLD2 | 0.4175 | RPL37A | 0.3713 | IPO9 | 0.3337 |
| SERPINH1 | 0.7126 | AIFM2 | 0.5471 | PXDNL | 0.4689 | GNLY | 0.4175 | NUDT15 | 0.3713 | CNTNAP3B | 0.3337 |
| STEAP3 | 0.7121 | FBXW9 | 0.5471 | NOB1 | 0.4688 | FAM27A | 0.4175 | CLEC14A | 0.3712 | C2orf62 | 0.3336 |
| VAMP8 | 0.7114 | GPNMB | 0.5470 | PPIE | 0.4688 | PSMC3 | 0.4175 | WASH3P | 0.3712 | ATP13A3 | 0.3336 |
| PHC2 | 0.7114 | PSMB10 | 0.5469 | C19orf70 | 0.4686 | HMGN1 | 0.4174 | RP11-79H23.3 | 0.3712 | CHURC1 | 0.3336 |
| CTSC | 0.7112 | AUP1 | 0.5468 | ACSL1 | 0.4686 | SAT2 | 0.4173 | RP4-792G4.2 | 0.3712 | PRPF38A | 0.3335 |
| YBX3 | 0.7111 | DNTTIP2 | 0.5468 | NOC2L | 0.4685 | PARP3 | 0.4172 | SIRPG | 0.3711 | MRPL38 | 0.3335 |
| TYMP | 0.7111 | CSRP2 | 0.5468 | FAM86A | 0.4685 | CCHCR1 | 0.4172 | KRT75 | 0.3711 | HCFC1R1 | 0.3335 |
| MYL12A | 0.7109 | SH2D4A | 0.5468 | ACTL10 | 0.4684 | UBE2K | 0.4171 | PTN | 0.3711 | TEX41 | 0.3334 |
| PPIB | 0.7109 | ERVK3-1 | 0.5466 | AAR2 | 0.4684 | PHRF1 | 0.4171 | UFM1 | 0.3711 | SLC19A1 | 0.3333 |
| RAB20 | 0.7106 | SWSAP1 | 0.5465 | EIF2D | 0.4683 | EVI2B | 0.4171 | ATAD3C | 0.3710 | SELK | 0.3333 |
| MYO1G | 0.7106 | SRPX | 0.5465 | RP11-23P13.7 | 0.4683 | WHAMM | 0.4171 | GPR160 | 0.3710 | MOCOS | 0.3333 |
| VIM | 0.7104 | LPAR6 | 0.5464 | CXCL1 | 0.4682 | RAB1B | 0.4171 | VSTM1 | 0.3710 | KIAA0101 | 0.3333 |
| GUSB | 0.7101 | PTPN9 | 0.5462 | CHMP6 | 0.4681 | PPIAP22 | 0.4169 | COPS3 | 0.3710 | NBL1 | 0.3332 |
| SERPING1 | 0.7101 | AP001007.1 | 0.5462 | COASY | 0.4681 | MAGOHB | 0.4169 | CINP | 0.3709 | RPS4X | 0.3332 |
| CLCF1 | 0.7099 | PRELID1 | 0.5461 | ETV4 | 0.4680 | NDUFA9 | 0.4168 | CTD-2583A14.11 | 0.3709 | CRB2 | 0.3332 |
| SNX8 | 0.7099 | HDAC3 | 0.5461 | PRKCD | 0.4680 | FTH1P2 | 0.4167 | RPS10 | 0.3709 | DYSF | 0.3331 |
| RCN3 | 0.7096 | CAPZB | 0.5460 | TOMM7 | 0.4679 | LEPREL2 | 0.4167 | ARSK | 0.3709 | RP11-647K16.1 | 0.3330 |
| EVA1B | 0.7090 | RP11-545E17.3 | 0.5458 | VRK3 | 0.4679 | TFEC | 0.4166 | COPB1 | 0.3708 | CTD-2031P19.4 | 0.3330 |
| IER5L | 0.7085 | SEC61B | 0.5458 | SLC29A1 | 0.4679 | TTC12 | 0.4166 | DCP1B | 0.3708 | OSBPL9 | 0.3330 |
| TGFB1I1 | 0.7084 | IBSP | 0.5457 | PDRG1 | 0.4678 | DENR | 0.4166 | BCAS2 | 0.3707 | CLYBL | 0.3329 |
| PYGL | 0.7084 | RP11-1398P2.1 | 0.5450 | SRCRB4D | 0.4678 | ARRDC3 | 0.4165 | MDP1 | 0.3707 | RP11-467D6.1 | 0.3329 |
| PLXND1 | 0.7079 | MCOLN1 | 0.5448 | GHDC | 0.4677 | LRRC37A3 | 0.4165 | SARS2 | 0.3707 | SLC2A8 | 0.3329 |
| SDF4 | 0.7079 | NR2F6 | 0.5446 | IDH1 | 0.4677 | IMMT | 0.4164 | RPL23A | 0.3706 | UMPS | 0.3329 |
| MYL6 | 0.7072 | CC2D1B | 0.5444 | PXDC1 | 0.4676 | DBNDD1 | 0.4163 | PLEKHF2 | 0.3705 | AC091171.1 | 0.3328 |
| PCOLCE | 0.7070 | SESN2 | 0.5444 | TNFRSF4 | 0.4676 | VPS16 | 0.4163 | SSBP2 | 0.3704 | CCDC96 | 0.3328 |
| FERMT3 | 0.7068 | GPAA1 | 0.5444 | IFI44 | 0.4676 | WEE1 | 0.4163 | CXADR | 0.3704 | MCAM | 0.3328 |
| PML | 0.7067 | CHST14 | 0.5444 | ALG2 | 0.4676 | PRRG2 | 0.4162 | SDS | 0.3704 | NTRK1 | 0.3328 |
| HSPA5 | 0.7065 | MESDC2 | 0.5443 | AC018816.3 | 0.4675 | ADAT3 | 0.4162 | ZMIZ2 | 0.3704 | SLC22A4 | 0.3328 |
| SPOCD1 | 0.7064 | RAP2B | 0.5443 | CHL1-AS2 | 0.4675 | EPAS1 | 0.4161 | RNF213 | 0.3704 | AC011737.2 | 0.3327 |
| LY96 | 0.7064 | CLEC7A | 0.5442 | TMC8 | 0.4675 | MIR145 | 0.4161 | GID8 | 0.3703 | CTD-2044J15.2 | 0.3327 |
| FCGRT | 0.7064 | ALPK1 | 0.5442 | FAM111A | 0.4674 | PSMG1 | 0.4161 | TRABD2B | 0.3703 | C11orf63 | 0.3327 |
| SERPINB6 | 0.7061 | COL13A1 | 0.5441 | TRAPPC5 | 0.4673 | AHCY | 0.4160 | MED11 | 0.3703 | PBX4 | 0.3327 |
| ANG | 0.7059 | SP110 | 0.5441 | RP11-359E10.1 | 0.4672 | CA3 | 0.4160 | DNAH9 | 0.3702 | WBP1L | 0.3326 |
| CEBPB | 0.7058 | SNHG18 | 0.5439 | SYNC | 0.4671 | MPV17 | 0.4160 | RP4-728D4.2 | 0.3702 | CCND3 | 0.3326 |
| LAMB1 | 0.7055 | MCL1 | 0.5437 | RP4-647J21.1 | 0.4671 | BCAP29 | 0.4159 | FAM229A | 0.3702 | PPIL2 | 0.3326 |
| SQRDL | 0.7051 | ZC3H12A | 0.5436 | MOB2 | 0.4670 | TTC23 | 0.4159 | NOL8 | 0.3702 | NELFB | 0.3326 |
| QSOX1 | 0.7049 | ZNF503-AS2 | 0.5435 | TMEM230 | 0.4668 | NACC1 | 0.4159 | RP11-792A8.4 | 0.3702 | CAMTA1 | 0.3325 |
| KDELR1 | 0.7049 | OSBPL3 | 0.5435 | CTD-2369P2.2 | 0.4668 | NARF | 0.4159 | AC092171.4 | 0.3701 | AC005606.15 | 0.3325 |
| SEC61A1 | 0.7045 | PIM3 | 0.5435 | WIBG | 0.4667 | EMC7 | 0.4158 | CTSH | 0.3700 | EGR2 | 0.3325 |
| TMEM8A | 0.7045 | RPL28 | 0.5434 | ACAA2 | 0.4667 | RUVBL1 | 0.4158 | FAM86JP | 0.3700 | C17orf59 | 0.3325 |
| HEXA | 0.7038 | YIF1B | 0.5432 | MAGOH | 0.4667 | PLBD2 | 0.4157 | RP11-1100L3.7 | 0.3700 | ZNF816 | 0.3324 |
| CHI3L1 | 0.7037 | NLRC5 | 0.5432 | FLNC | 0.4666 | DDX39B | 0.4157 | OTUD5 | 0.3699 | ARL8A | 0.3323 |
| DTX2 | 0.7036 | SMUG1 | 0.5431 | NPHP1 | 0.4666 | ARSE | 0.4156 | RP11-206L10.1 | 0.3698 | RGL2 | 0.3323 |
| DBNL | 0.7035 | PDGFA | 0.5426 | ZMYND15 | 0.4666 | KCNE3 | 0.4156 | SLFN12 | 0.3698 | CCNB2 | 0.3323 |
| SERPINE1 | 0.7030 | NQO2 | 0.5423 | PRR5 | 0.4666 | ARID3A | 0.4155 | TMEM186 | 0.3698 | RPS13 | 0.3322 |
| ATF5 | 0.7029 | CD274 | 0.5423 | NSFL1C | 0.4666 | FDX1 | 0.4155 | MED14-AS1 | 0.3698 | CNOT1 | 0.3322 |
| PSMB8 | 0.7026 | KIAA0226L | 0.5421 | LTB | 0.4665 | ZFPL1 | 0.4155 | RP11-425L10.1 | 0.3697 | POLR1E | 0.3322 |
| CARD16 | 0.7023 | PDCD5 | 0.5420 | GUCD1 | 0.4665 | ZNF217 | 0.4154 | TPM3P9 | 0.3697 | MLXIP | 0.3322 |
| RP11-806H10.4 | 0.7018 | EML3 | 0.5419 | FAM3A | 0.4665 | SEL1L3 | 0.4154 | OAZ3 | 0.3697 | ZNF830 | 0.3322 |
| AGPAT2 | 0.7015 | RIC8A | 0.5419 | ADORA3 | 0.4665 | LRRC41 | 0.4154 | CEP41 | 0.3697 | LEO1 | 0.3321 |
| TNFRSF14 | 0.7010 | GLIPR1 | 0.5418 | LUCAT1 | 0.4665 | ITGB7 | 0.4153 | ENTPD1 | 0.3696 | ZNF473 | 0.3321 |
| AGTRAP | 0.7003 | ASCC2 | 0.5417 | BATF2 | 0.4664 | PHF23 | 0.4152 | PDCD2L | 0.3695 | DNAJC10 | 0.3321 |
| CYBA | 0.7002 | TRIM38 | 0.5416 | CFD | 0.4664 | APLN | 0.4151 | RP11-848P1.2 | 0.3695 | CCZ1B | 0.3320 |
| MANF | 0.7000 | PHPT1 | 0.5415 | LRRFIP1 | 0.4664 | TRDC | 0.4151 | RP11-65L3.4 | 0.3694 | ZNF706 | 0.3320 |
| CTSD | 0.6996 | THBS3 | 0.5413 | OBFC1 | 0.4663 | EXTL3 | 0.4151 | DHX38 | 0.3694 | MRPS18B | 0.3320 |
| PKM | 0.6996 | OCEL1 | 0.5412 | PRAM1 | 0.4663 | HSPE1 | 0.4150 | NPB | 0.3694 | LPIN3 | 0.3319 |
| CTSA | 0.6988 | CNOT3 | 0.5410 | DRG2 | 0.4662 | AKAP17A | 0.4150 | SURF6 | 0.3693 | LMF1 | 0.3319 |
| VASN | 0.6986 | RNF25 | 0.5410 | HDDC3 | 0.4662 | UCN2 | 0.4150 | RBPMS2 | 0.3693 | ENPP1 | 0.3319 |
| RP11-65J3.1 | 0.6984 | WTIP | 0.5409 | SP6 | 0.4659 | CCR2 | 0.4149 | DUSP15 | 0.3692 | RPL34 | 0.3319 |
| TSPAN4 | 0.6976 | HDHD3 | 0.5409 | RP3-510D11.2 | 0.4659 | FTH1P8 | 0.4149 | RPL10 | 0.3691 | PIPOX | 0.3319 |
| SRPX2 | 0.6972 | SSR2 | 0.5408 | HSPB11 | 0.4658 | AL354993.1 | 0.4149 | FCGR1C | 0.3691 | XXbac-BPG252P9.10 | 0.3319 |
| IGFBP4 | 0.6965 | SNAI2 | 0.5408 | FAM96B | 0.4658 | TESK1 | 0.4149 | CD27 | 0.3690 | MXD1 | 0.3318 |
| BCL2L12 | 0.6956 | POPDC2 | 0.5408 | RILP | 0.4658 | C14orf23 | 0.4148 | B4GALT2 | 0.3690 | GLE1 | 0.3318 |
| PFN1 | 0.6955 | C14orf79 | 0.5407 | HAVCR2 | 0.4658 | VWA5A | 0.4148 | MORC4 | 0.3690 | LAG3 | 0.3317 |
| PLXNB2 | 0.6952 | SYNGR2 | 0.5407 | HSF1 | 0.4657 | ST5 | 0.4148 | ANKRD10 | 0.3690 | TMEM9 | 0.3317 |
| TWF2 | 0.6949 | PNP | 0.5406 | TPRG1 | 0.4656 | DPM1 | 0.4148 | MAML1 | 0.3688 | RP5-1024N4.4 | 0.3317 |
| CAPG | 0.6947 | CTD-2270L9.4 | 0.5406 | PSMB6 | 0.4656 | FKBP7 | 0.4147 | PTPRCAP | 0.3688 | RPP25L | 0.3317 |
| LGALS3BP | 0.6945 | SMG6 | 0.5406 | C14orf166 | 0.4656 | GIMAP5 | 0.4147 | FTH1P7 | 0.3688 | CMSS1 | 0.3316 |
| HLX | 0.6938 | MED18 | 0.5406 | BCAT1 | 0.4655 | MKL1 | 0.4145 | EIF3C | 0.3688 | MTCP1 | 0.3316 |
| CFI | 0.6937 | SDSL | 0.5405 | C19orf40 | 0.4654 | C9orf116 | 0.4145 | BIK | 0.3687 | RPP25 | 0.3316 |
| SYDE1 | 0.6935 | CTNNA1 | 0.5404 | C20orf27 | 0.4654 | HAUS5 | 0.4144 | CIDECP | 0.3687 | SLMO2 | 0.3316 |
| DNAJB1 | 0.6932 | RHBDF1 | 0.5404 | ACOX3 | 0.4653 | PACS1 | 0.4144 | PVT1 | 0.3686 | FAIM3 | 0.3315 |
| RNASE4 | 0.6930 | RAB38 | 0.5404 | FTSJ1 | 0.4653 | HSD17B14 | 0.4144 | MIOS | 0.3686 | TMEM69 | 0.3315 |
| PDIA3 | 0.6926 | TFPT | 0.5404 | NRP2 | 0.4652 | EXOSC7 | 0.4144 | PLAC9 | 0.3686 | C5orf55 | 0.3315 |
| COLGALT1 | 0.6926 | DIRAS3 | 0.5401 | C2CD2 | 0.4651 | ECSCR | 0.4143 | TMEM14C | 0.3686 | ACSL5 | 0.3314 |
| FKBP11 | 0.6923 | SFRP4 | 0.5401 | EMC10 | 0.4650 | SCIN | 0.4142 | ACKR3 | 0.3685 | ANKRD1 | 0.3314 |
| C1S | 0.6921 | GLT8D1 | 0.5400 | CD180 | 0.4650 | SNHG9 | 0.4142 | TRAPPC2L | 0.3685 | DESI2 | 0.3314 |
| BATF3 | 0.6920 | MGST2 | 0.5400 | PDZK1IP1 | 0.4650 | AC007390.5 | 0.4140 | SRSF6 | 0.3685 | TNFRSF19 | 0.3314 |
| PRDX4 | 0.6916 | PPIA | 0.5399 | ABCF3 | 0.4650 | RP11-1024P17.1 | 0.4140 | CH25H | 0.3684 | AC007383.3 | 0.3313 |
| GMPPA | 0.6914 | ASS1 | 0.5397 | ANXA11 | 0.4649 | SORBS3 | 0.4139 | DDX54 | 0.3684 | TSPAN6 | 0.3313 |
| CD44 | 0.6911 | NAGA | 0.5396 | NT5C | 0.4648 | RARS2 | 0.4139 | PEX11B | 0.3684 | RTN4IP1 | 0.3313 |
| TCIRG1 | 0.6905 | IGFBP7 | 0.5395 | AQP9 | 0.4648 | RPL35A | 0.4138 | PIFO | 0.3684 | MARK2 | 0.3313 |
| RAB13 | 0.6893 | TMEM173 | 0.5395 | ELOVL1 | 0.4648 | SNW1 | 0.4138 | ECHDC1 | 0.3684 | TMEM63B | 0.3313 |
| MT2A | 0.6892 | MRPL37 | 0.5393 | KIAA0247 | 0.4648 | EEFSEC | 0.4138 | EPRS | 0.3683 | PGM2L1 | 0.3312 |
| QPCTL | 0.6890 | HDAC1 | 0.5393 | MOSPD3 | 0.4648 | C15orf39 | 0.4137 | IFT57 | 0.3682 | KDM4A-AS1 | 0.3312 |
| APOBEC3F | 0.6889 | ATHL1 | 0.5391 | EIF3M | 0.4648 | CD9 | 0.4137 | RP11-109P14.10 | 0.3682 | BCL6 | 0.3312 |
| S100A6 | 0.6889 | HSPA4 | 0.5390 | SMG9 | 0.4647 | MEST | 0.4136 | FOXL1 | 0.3682 | RP11-543P15.1 | 0.3312 |
| ICAM3 | 0.6884 | BDKRB2 | 0.5390 | ARCN1 | 0.4647 | TRPC2 | 0.4136 | AF127577.10 | 0.3682 | PITX1 | 0.3310 |
| TMEM255B | 0.6882 | WDR46 | 0.5389 | AURKAIP1 | 0.4646 | MPV17L2 | 0.4135 | PARD6G | 0.3682 | GALC | 0.3310 |
| LAMB2 | 0.6881 | C4B | 0.5387 | MCTS1 | 0.4646 | SYPL1 | 0.4135 | C12orf5 | 0.3681 | CXXC1 | 0.3310 |
| NPC2 | 0.6881 | CSNK1D | 0.5387 | DNASE1L1 | 0.4645 | SUV39H1 | 0.4134 | CLTA | 0.3681 | AC018766.4 | 0.3310 |
| PIGT | 0.6880 | BET1 | 0.5383 | STX5 | 0.4645 | DHRS7 | 0.4133 | CD79B | 0.3681 | RP11-498E2.7 | 0.3310 |
| LAPTM5 | 0.6871 | FBRS | 0.5383 | ISY1 | 0.4645 | RAB17 | 0.4133 | RTEL1 | 0.3681 | RAB5C | 0.3308 |
| PDPN | 0.6871 | CABP4 | 0.5382 | VEGFA | 0.4644 | MPC2 | 0.4132 | YAE1D1 | 0.3681 | RP1-317E23.3 | 0.3307 |
| ALOX5AP | 0.6870 | UBTD1 | 0.5382 | ARPC5L | 0.4643 | LTV1 | 0.4132 | KATNA1 | 0.3681 | SLC15A4 | 0.3307 |
| POLD4 | 0.6870 | NDRG1 | 0.5380 | MAP2K2 | 0.4643 | CDK5RAP3 | 0.4132 | ULK4 | 0.3680 | SURF2 | 0.3306 |
| TREM1 | 0.6868 | TNIP2 | 0.5380 | ISCA2 | 0.4643 | SF3B14 | 0.4130 | UBOX5 | 0.3680 | RTFDC1 | 0.3305 |
| HSPA6 | 0.6865 | TMSB4XP8 | 0.5379 | PLXNA3 | 0.4641 | MAFG-AS1 | 0.4130 | TBC1D2B | 0.3680 | RP11-473M20.7 | 0.3305 |
| RAB32 | 0.6861 | ATP6V0B | 0.5378 | MTG2 | 0.4640 | SWAP70 | 0.4130 | GABARAP | 0.3679 | RPL9 | 0.3304 |
| SHISA5 | 0.6860 | EGR1 | 0.5378 | ZNF880 | 0.4640 | MAP2K7 | 0.4130 | RP11-80H8.4 | 0.3678 | KPNA4 | 0.3304 |
| RHOC | 0.6856 | NTMT1 | 0.5377 | C19orf44 | 0.4639 | ROM1 | 0.4130 | SNRPE | 0.3678 | JPH2 | 0.3304 |
| PDIA4 | 0.6853 | M6PR | 0.5375 | ARAP1 | 0.4639 | GNPTG | 0.4130 | WDR24 | 0.3678 | COL14A1 | 0.3304 |
| ZDHHC12 | 0.6848 | SOD3 | 0.5372 | MED7 | 0.4638 | AIFM1 | 0.4127 | SGTA | 0.3678 | ID1 | 0.3303 |
| ANGPTL4 | 0.6845 | ZNF585A | 0.5370 | AP1S2 | 0.4638 | RPL23AP1 | 0.4127 | DGAT1 | 0.3677 | RFC4 | 0.3303 |
| MYO1C | 0.6843 | SND1 | 0.5370 | ELANE | 0.4638 | RP11-930P14.2 | 0.4126 | PHF1 | 0.3677 | SIRT3 | 0.3303 |
| MUC1 | 0.6843 | GNS | 0.5369 | CARD8 | 0.4637 | RP11-473M20.9 | 0.4126 | CDC34 | 0.3676 | RABL2B | 0.3303 |
| CCDC109B | 0.6840 | DENND1C | 0.5369 | PNPLA6 | 0.4636 | SNRNP70 | 0.4125 | SS18L2 | 0.3676 | CLCNKB | 0.3302 |
| RP11-395B7.7 | 0.6833 | DAP | 0.5368 | RP11-1008C21.2 | 0.4636 | NANP | 0.4125 | TRIM14 | 0.3676 | TRMT10C | 0.3302 |
| SUSD2 | 0.6830 | KCNJ8 | 0.5366 | SF3A3 | 0.4636 | YIPF3 | 0.4125 | TARDBP | 0.3676 | RBM6 | 0.3302 |
| PARVB | 0.6830 | NUP37 | 0.5366 | NDUFB2 | 0.4636 | RP11-339B21.10 | 0.4125 | MRPL42 | 0.3676 | EML4 | 0.3301 |
| SLC25A19 | 0.6826 | BCL10 | 0.5366 | FIBP | 0.4635 | CRYZ | 0.4124 | ZNF414 | 0.3675 | RAB11FIP5 | 0.3301 |
| AC147651.4 | 0.6821 | THG1L | 0.5365 | CARS2 | 0.4635 | COMMD6 | 0.4124 | PARP14 | 0.3675 | SLC31A1 | 0.3301 |
| TMEM115 | 0.6819 | VENTX | 0.5363 | IL3RA | 0.4635 | DDX47 | 0.4123 | RASD1 | 0.3675 | BSCL2 | 0.3300 |
| CD97 | 0.6819 | HYAL2 | 0.5363 | RPL41 | 0.4634 | NUDT14 | 0.4123 | RP11-640M9.1 | 0.3675 | RP11-802E16.3 | 0.3299 |
| PPP1R15A | 0.6816 | TM4SF1 | 0.5363 | MLPH | 0.4634 | RAE1 | 0.4122 | UQCC2 | 0.3675 | C4orf27 | 0.3299 |
| APOBR | 0.6804 | SWI5 | 0.5363 | TMEM258 | 0.4634 | CDKN3 | 0.4122 | VPS28 | 0.3674 | AC006126.4 | 0.3299 |
| B4GALT1 | 0.6803 | CLPP | 0.5362 | COL22A1 | 0.4634 | UBE2V1 | 0.4122 | NDUFS3 | 0.3674 | RBM14 | 0.3299 |
| RCAN1 | 0.6800 | MBD2 | 0.5361 | CTB-61M7.2 | 0.4633 | ABHD16A | 0.4122 | ITGB2-AS1 | 0.3674 | KTN1 | 0.3299 |
| PLIN2 | 0.6800 | FAM86B3P | 0.5360 | CTD-2587H19.1 | 0.4633 | PSMC5 | 0.4120 | IGHM | 0.3673 | SSB | 0.3299 |
| ACTA2 | 0.6792 | PSMD13 | 0.5360 | ZFYVE19 | 0.4633 | RP11-148K1.12 | 0.4120 | CUL3 | 0.3672 | TRMT6 | 0.3299 |
| MGAT4B | 0.6785 | SLC25A39 | 0.5360 | COX17 | 0.4632 | ALKBH7 | 0.4120 | CTD-2227E11.1 | 0.3672 | NCOR2 | 0.3298 |
| SLC35C1 | 0.6783 | ST20 | 0.5360 | ARRDC4 | 0.4632 | UGGT1 | 0.4119 | CCDC51 | 0.3670 | CLEC18C | 0.3298 |
| AEBP1 | 0.6776 | PRMT2 | 0.5359 | AKIP1 | 0.4632 | MECR | 0.4118 | CARD11 | 0.3670 | C16orf74 | 0.3298 |
| PHLDA2 | 0.6775 | FCGBP | 0.5359 | YTHDF2 | 0.4632 | EN2 | 0.4117 | PCSK1 | 0.3669 | PACSIN3 | 0.3297 |
| CMTM3 | 0.6774 | SPATA2L | 0.5359 | PMPCA | 0.4631 | WASH6P | 0.4116 | RALB | 0.3669 | TMEM218 | 0.3297 |
| SH3BGRL3 | 0.6771 | TREML3P | 0.5358 | ABCF2 | 0.4631 | GBP5 | 0.4116 | ZKSCAN5 | 0.3669 | PARP6 | 0.3297 |
| SLC11A1 | 0.6770 | MBOAT7 | 0.5358 | UFD1L | 0.4631 | MRPL52 | 0.4116 | ZC3H3 | 0.3669 | DGCR6L | 0.3296 |
| HDAC7 | 0.6766 | AAED1 | 0.5356 | ATP5H | 0.4631 | CTD-2267D19.3 | 0.4116 | SLC7A8 | 0.3669 | RPL21 | 0.3296 |
| LDHA | 0.6762 | MOB3C | 0.5356 | FILIP1L | 0.4630 | SPATC1L | 0.4115 | ITPRIPL1 | 0.3668 | PPBP | 0.3295 |
| MYL9 | 0.6761 | TSEN34 | 0.5356 | LILRA5 | 0.4629 | GAMT | 0.4114 | GAL | 0.3668 | NUS1 | 0.3295 |
| C5AR1 | 0.6756 | GSS | 0.5355 | LYN | 0.4629 | NDUFA2 | 0.4114 | TNFAIP8L1 | 0.3668 | C20orf196 | 0.3294 |
| AP5Z1 | 0.6749 | SRPRB | 0.5355 | GNAI3 | 0.4629 | ITPR3 | 0.4114 | NFIC | 0.3667 | TSG101 | 0.3294 |
| ECE1 | 0.6744 | PIK3R6 | 0.5355 | TIGD6 | 0.4628 | GLRX3 | 0.4113 | NPM3 | 0.3667 | SUV420H2 | 0.3294 |
| C1QTNF6 | 0.6743 | BSG | 0.5354 | DHRSX | 0.4624 | PDLIM3 | 0.4113 | JUP | 0.3666 | CCDC50 | 0.3293 |
| FTL | 0.6740 | TPT1 | 0.5353 | NOX4 | 0.4623 | AC092299.7 | 0.4113 | PHB2 | 0.3666 | C20orf166-AS1 | 0.3293 |
| LOXL1 | 0.6736 | FBXW5 | 0.5353 | TWSG1 | 0.4623 | ZNF416 | 0.4111 | INTS3 | 0.3666 | JAM3 | 0.3293 |
| GALNT2 | 0.6736 | SIX5 | 0.5352 | SYCE1L | 0.4622 | RBFA | 0.4111 | CDK3 | 0.3665 | RP11-203I2.1 | 0.3293 |
| STK40 | 0.6730 | TNFAIP8L2 | 0.5352 | LINC00623 | 0.4622 | EPHB4 | 0.4111 | CCNL2 | 0.3665 | LCK | 0.3293 |
| HTRA3 | 0.6726 | GGCX | 0.5350 | MR1 | 0.4622 | LINC00702 | 0.4110 | TM6SF2 | 0.3665 | OR7E102P | 0.3292 |
| TPD52L2 | 0.6720 | TNC | 0.5350 | RP11-536K7.3 | 0.4621 | NLN | 0.4109 | P2RY8 | 0.3665 | ANGPTL6 | 0.3291 |
| ANPEP | 0.6707 | RABAC1 | 0.5350 | ASPN | 0.4620 | NUP93 | 0.4109 | MRPL28 | 0.3664 | COX7A2 | 0.3291 |
| TTC38 | 0.6705 | NPEPL1 | 0.5349 | PTCD1 | 0.4620 | PRRX2 | 0.4109 | STK32B | 0.3664 | SDHAF2 | 0.3291 |
| LEPRE1 | 0.6703 | LILRA6 | 0.5347 | FAM83G | 0.4619 | NRDE2 | 0.4108 | DAG1 | 0.3664 | ECI1 | 0.3291 |
| CASP1 | 0.6700 | CNPY3 | 0.5344 | STYXL1 | 0.4618 | TRAF3IP2 | 0.4107 | PLCG2 | 0.3664 | MTFMT | 0.3290 |
| TMED3 | 0.6696 | GSTO1 | 0.5343 | BLOC1S3 | 0.4617 | USP40 | 0.4105 | APH1B | 0.3664 | SF3B2 | 0.3290 |
| YIPF2 | 0.6694 | TNFRSF6B | 0.5342 | SPEG | 0.4617 | DMBX1 | 0.4105 | ZNF768 | 0.3664 | C1QTNF2 | 0.3289 |
| FES | 0.6692 | ERP44 | 0.5341 | IL1RAP | 0.4617 | RP1-102K2.8 | 0.4105 | CXCL6 | 0.3664 | MCM7 | 0.3289 |
| IL32 | 0.6690 | CARHSP1 | 0.5340 | TRAF2 | 0.4616 | ATXN2L | 0.4104 | CHMP7 | 0.3663 | TMEM220 | 0.3288 |
| CD248 | 0.6684 | ATP1A1 | 0.5340 | TMEM251 | 0.4616 | ADAMTS2 | 0.4104 | PILRB | 0.3663 | GPRC5C | 0.3288 |
| HRH1 | 0.6683 | NOTCH2NL | 0.5339 | GNG10 | 0.4615 | PCNA | 0.4103 | SLAMF7 | 0.3662 | NOP2 | 0.3288 |
| RIPK1 | 0.6680 | SNRPD2 | 0.5339 | CAPN1 | 0.4615 | ZNF212 | 0.4103 | PNKD | 0.3662 | SPN | 0.3287 |
| ST14 | 0.6680 | PDCL3 | 0.5338 | AGRN | 0.4615 | EDEM1 | 0.4103 | FKBP15 | 0.3661 | COX8A | 0.3286 |
| GMFG | 0.6676 | IFRD1 | 0.5336 | ANXA4 | 0.4615 | OSCP1 | 0.4102 | RAB35 | 0.3661 | FAHD2A | 0.3286 |
| SLC50A1 | 0.6669 | RP11-420L9.5 | 0.5336 | MT1F | 0.4614 | MRPS33 | 0.4101 | WASH2P | 0.3661 | AMFR | 0.3285 |
| FAM20A | 0.6669 | FAP | 0.5335 | TNFRSF10B | 0.4614 | BUD13 | 0.4101 | DNAH11 | 0.3660 | ABC7-42389800N19.1 | 0.3285 |
| FURIN | 0.6666 | MYBPH | 0.5335 | HTATIP2 | 0.4614 | ANKRD37 | 0.4101 | ALKBH2 | 0.3660 | PPP4R1L | 0.3284 |
| OSCAR | 0.6666 | RNF114 | 0.5335 | RARRES1 | 0.4613 | MEF2BNB-MEF2B | 0.4100 | RP3-439F8.1 | 0.3660 | TMEM42 | 0.3284 |
| CAV1 | 0.6666 | CASP7 | 0.5335 | MPDU1 | 0.4613 | IGLC2 | 0.4099 | NSUN2 | 0.3660 | DONSON | 0.3284 |
| CHID1 | 0.6665 | PHYKPL | 0.5335 | ARL11 | 0.4613 | PSTPIP2 | 0.4099 | POLE4 | 0.3660 | AC112229.4 | 0.3283 |
| BRI3 | 0.6662 | ADAM12 | 0.5333 | VDAC1 | 0.4613 | BCS1L | 0.4099 | BAG3 | 0.3660 | ALG13 | 0.3283 |
| TRPV2 | 0.6661 | FGFRL1 | 0.5331 | STAT2 | 0.4612 | ERBB2 | 0.4099 | POLR3C | 0.3659 | RP11-253E3.3 | 0.3282 |
| C1RL | 0.6660 | JAK3 | 0.5331 | EFNB2 | 0.4611 | EMID1 | 0.4098 | VNN1 | 0.3657 | CRLS1 | 0.3281 |
| P4HA2 | 0.6660 | FAM47E-STBD1 | 0.5329 | BOLA2B | 0.4611 | C11orf48 | 0.4098 | NPR2 | 0.3656 | CCDC167 | 0.3281 |
| BAX | 0.6659 | CTSZ | 0.5328 | DLGAP1-AS2 | 0.4610 | IL7 | 0.4098 | SIGIRR | 0.3655 | ABHD3 | 0.3281 |
| SLC22A18 | 0.6658 | CYSTM1 | 0.5327 | CXCL2 | 0.4608 | NDUFS8 | 0.4097 | SULF2 | 0.3655 | PITPNA-AS1 | 0.3281 |
| BACE2 | 0.6657 | SNHG12 | 0.5327 | SYVN1 | 0.4606 | EEF1D | 0.4097 | ASNA1 | 0.3654 | MATN4 | 0.3278 |
| SIL1 | 0.6655 | ITGAM | 0.5327 | CEP112 | 0.4606 | PCBD1 | 0.4096 | MAP1LC3C | 0.3654 | SLFN5 | 0.3277 |
| GSTK1 | 0.6652 | TRIAP1 | 0.5327 | PTK7 | 0.4605 | C20orf96 | 0.4095 | NPNT | 0.3653 | ANAPC16 | 0.3277 |
| REEP4 | 0.6650 | CTDP1 | 0.5326 | VIM-AS1 | 0.4605 | CRIP2 | 0.4094 | RP11-107N15.1 | 0.3653 | METTL16 | 0.3277 |
| CD14 | 0.6649 | TRAPPC1 | 0.5325 | EMR2 | 0.4605 | GGT1 | 0.4093 | NFATC2 | 0.3653 | MXRA5P1 | 0.3276 |
| GPSM3 | 0.6648 | IL8 | 0.5324 | RPL11 | 0.4605 | KLHDC8B | 0.4093 | FXN | 0.3653 | TFDP1 | 0.3276 |
| CD99 | 0.6648 | SAA2 | 0.5324 | SNAPC1 | 0.4605 | MEN1 | 0.4092 | IL17RE | 0.3653 | DPH7 | 0.3276 |
| BATF | 0.6647 | MAP3K14 | 0.5324 | IRF5 | 0.4605 | ZNF28 | 0.4092 | AP3S1 | 0.3651 | RPL7 | 0.3276 |
| PFKL | 0.6644 | DNTTIP1 | 0.5323 | LTA4H | 0.4605 | DMRTA2 | 0.4092 | TMEM221 | 0.3651 | CAMK2D | 0.3274 |
| DAPK3 | 0.6642 | PSRC1 | 0.5323 | BOLA2 | 0.4604 | RAMP3 | 0.4092 | CENPP | 0.3651 | STK25 | 0.3274 |
| FLOT1 | 0.6641 | CLEC18A | 0.5323 | CCDC59 | 0.4603 | CDV3 | 0.4091 | RPL38 | 0.3650 | WDFY2 | 0.3273 |
| TUBB6 | 0.6636 | ATL3 | 0.5322 | RAB36 | 0.4603 | ZFAS1 | 0.4091 | HIGD1B | 0.3650 | TNFRSF10A | 0.3273 |
| AK2 | 0.6632 | CHCHD7 | 0.5322 | TRAC | 0.4602 | TOMM5 | 0.4087 | EMC9 | 0.3650 | DDX51 | 0.3272 |
| HMOX1 | 0.6630 | VMP1 | 0.5322 | MEDAG | 0.4602 | RP11-222K16.2 | 0.4087 | MPHOSPH6 | 0.3649 | PAOX | 0.3271 |
| ABCC3 | 0.6628 | ZNF408 | 0.5322 | MIR142 | 0.4601 | AC024592.12 | 0.4087 | CCDC151 | 0.3648 | FAM104A | 0.3271 |
| GYS1 | 0.6628 | SMCO4 | 0.5321 | LINC00963 | 0.4601 | RP11-5C23.1 | 0.4086 | ADCK5 | 0.3648 | HAS2-AS1 | 0.3271 |
| RIN1 | 0.6623 | ZNHIT1 | 0.5321 | NOP14 | 0.4601 | STOM | 0.4086 | SMURF1 | 0.3648 | RGS17 | 0.3270 |
| NTAN1 | 0.6622 | TARBP2 | 0.5321 | GPX4 | 0.4601 | PEX11G | 0.4085 | ZBTB9 | 0.3647 | TMEM185B | 0.3270 |
| KRT7 | 0.6621 | RASAL3 | 0.5321 | MED26 | 0.4600 | CCDC24 | 0.4085 | RAMP1 | 0.3647 | ERMARD | 0.3269 |
| DNPEP | 0.6619 | DDX56 | 0.5320 | HIC1 | 0.4600 | IGHG3 | 0.4085 | CSAG1 | 0.3647 | PAPD7 | 0.3269 |
| MAP3K6 | 0.6614 | GPN2 | 0.5319 | CPZ | 0.4600 | HSD17B7 | 0.4084 | LY6E | 0.3647 | ASMTL-AS1 | 0.3268 |
| JMJD6 | 0.6613 | C4A | 0.5318 | RPL13A | 0.4599 | PYROXD2 | 0.4084 | TBC1D22B | 0.3647 | MDGA1 | 0.3268 |
| TSPO | 0.6612 | TMEM179B | 0.5318 | TMEM238 | 0.4599 | RP4-569M23.2 | 0.4084 | NAT6 | 0.3647 | TBC1D13 | 0.3268 |
| FXYD5 | 0.6610 | TMEM37 | 0.5316 | PSEN2 | 0.4599 | MSANTD3 | 0.4083 | HS2ST1 | 0.3646 | RBM4 | 0.3267 |
| SNAI1 | 0.6609 | MSR1 | 0.5315 | LINC00339 | 0.4598 | TSHZ3 | 0.4082 | RPS6KA4 | 0.3646 | GLI4 | 0.3267 |
| TMEM109 | 0.6608 | LINC01057 | 0.5315 | NFATC4 | 0.4598 | DUSP4 | 0.4082 | MRPS10 | 0.3645 | ZNF185 | 0.3267 |
| CCDC9 | 0.6606 | ELOF1 | 0.5314 | BNIP1 | 0.4598 | HOXB2 | 0.4082 | VKORC1L1 | 0.3645 | RP11-140K17.3 | 0.3267 |
| PSMB9 | 0.6603 | FPGS | 0.5312 | C20orf195 | 0.4597 | EMC8 | 0.4082 | DNAJC25 | 0.3645 | COG3 | 0.3266 |
| MTFP1 | 0.6600 | DPP7 | 0.5309 | SLC39A8 | 0.4597 | NDUFB7 | 0.4081 | EIF3F | 0.3644 | CTD-2350C19.2 | 0.3266 |
| CISH | 0.6597 | ARF4 | 0.5309 | CCR10 | 0.4597 | ARMC9 | 0.4081 | CTD-2532N20.1 | 0.3643 | LMO4 | 0.3266 |
| CKAP4 | 0.6594 | TTC4 | 0.5308 | STARD3NL | 0.4596 | PDLIM2 | 0.4081 | MRPL40 | 0.3642 | CTA-211A9.5 | 0.3265 |
| DDB2 | 0.6593 | ACAP1 | 0.5308 | UQCRQ | 0.4596 | ST3GAL4 | 0.4080 | RP11-834C11.4 | 0.3642 | TSPAN32 | 0.3265 |
| SLC39A7 | 0.6592 | PLEKHG2 | 0.5308 | GEMIN6 | 0.4596 | SAAL1 | 0.4080 | COX4I1 | 0.3642 | COPS7A | 0.3265 |
| TPM2 | 0.6590 | ATP6AP1 | 0.5307 | GOLT1B | 0.4596 | EYA2 | 0.4079 | PDGFRB | 0.3642 | SAP18 | 0.3265 |
| SIGLEC9 | 0.6589 | ELF4 | 0.5307 | RALY | 0.4595 | AK4 | 0.4079 | PYY2 | 0.3641 | FAM209B | 0.3265 |
| ILK | 0.6588 | LONP1 | 0.5306 | RPIA | 0.4595 | RP11-1277A3.3 | 0.4078 | RANGRF | 0.3640 | CCL8 | 0.3265 |
| CLEC2B | 0.6584 | IL1R1 | 0.5305 | LINC00085 | 0.4594 | SHB | 0.4077 | RAB24 | 0.3640 | RPS3A | 0.3264 |
| HSP90B1 | 0.6581 | FPR1 | 0.5305 | SMIM20 | 0.4594 | RP11-316M1.12 | 0.4077 | ANKRD35 | 0.3640 | PAPSS2 | 0.3264 |
| HMGCL | 0.6580 | UTP14A | 0.5305 | MEA1 | 0.4594 | MTERFD1 | 0.4076 | WDR5 | 0.3640 | AC011526.1 | 0.3264 |
| TRADD | 0.6579 | ST6GALNAC4 | 0.5303 | SLC39A3 | 0.4593 | PIR | 0.4075 | TLDC1 | 0.3639 | LY9 | 0.3264 |
| LOX | 0.6577 | RNASE6 | 0.5300 | PARVA | 0.4592 | RP11-342M1.3 | 0.4075 | NAGPA | 0.3639 | PPM1F | 0.3264 |
| SOCS1 | 0.6576 | FCHSD1 | 0.5300 | UBE2A | 0.4592 | CTD-3232M19.2 | 0.4074 | RP4-665J23.1 | 0.3639 | C7orf55 | 0.3264 |
| FN1 | 0.6573 | CD1D | 0.5296 | PPP2R4 | 0.4592 | MAPK7 | 0.4074 | MED4 | 0.3639 | RP4-548D19.3 | 0.3263 |
| SLC52A2 | 0.6573 | MIR155HG | 0.5295 | TCEA3 | 0.4591 | ACP1 | 0.4073 | ASTE1 | 0.3638 | SLC52A1 | 0.3263 |
| S100A16 | 0.6570 | CNIH3 | 0.5295 | ETFB | 0.4591 | RPS8 | 0.4073 | PDCL3P5 | 0.3638 | AC139100.2 | 0.3263 |
| IGFLR1 | 0.6569 | ZNF259 | 0.5294 | AKAP8 | 0.4591 | PPRC1 | 0.4072 | RPUSD2 | 0.3638 | PPA2 | 0.3262 |
| IKBIP | 0.6567 | CTGF | 0.5294 | RNF19B | 0.4591 | RP1-244F24.1 | 0.4072 | RBKS | 0.3638 | ZC2HC1C | 0.3262 |
| DOK1 | 0.6563 | GRAMD1A | 0.5294 | KCTD14 | 0.4591 | MIR503HG | 0.4071 | C8orf33 | 0.3638 | MED27 | 0.3261 |
| CSTA | 0.6563 | KRTCAP2 | 0.5293 | GMDS | 0.4590 | MITD1 | 0.4071 | SNHG7 | 0.3637 | GOLGA3 | 0.3261 |
| PDLIM1 | 0.6561 | TXN | 0.5293 | FDXR | 0.4590 | TMEM203 | 0.4070 | HMBS | 0.3637 | NT5C3A | 0.3261 |
| HM13 | 0.6560 | MRPL36 | 0.5292 | PTAFR | 0.4590 | NDUFA13 | 0.4070 | TIMM50 | 0.3636 | ZNF211 | 0.3260 |
| CACNA2D4 | 0.6560 | ATP1B3 | 0.5291 | SNRPB2 | 0.4589 | CPSF3 | 0.4070 | CKS2 | 0.3635 | IDH2 | 0.3259 |
| ACTB | 0.6558 | IL18BP | 0.5290 | KISS1R | 0.4588 | POP5 | 0.4070 | FAM127C | 0.3635 | FAM110D | 0.3259 |
| STXBP2 | 0.6558 | SSBP1 | 0.5290 | CDC20 | 0.4588 | RP11-145M9.4 | 0.4069 | RPA2 | 0.3635 | PRIMA1 | 0.3259 |
| CD300A | 0.6556 | DAGLB | 0.5290 | CRTC2 | 0.4587 | ABCF1 | 0.4069 | JSRP1 | 0.3635 | RPL3 | 0.3259 |
| YKT6 | 0.6552 | PDE6G | 0.5289 | SYS1 | 0.4587 | RP1-261D10.2 | 0.4068 | TMEM185A | 0.3634 | HLA-H | 0.3258 |
| ARPC4 | 0.6551 | RNF7 | 0.5288 | SAP30L | 0.4587 | CPXM1 | 0.4066 | TMED5 | 0.3634 | GTF2H4 | 0.3258 |
| PLEK2 | 0.6549 | RABL5 | 0.5287 | ZNF226 | 0.4586 | MRPS5 | 0.4066 | MOSPD1 | 0.3634 | CDK2 | 0.3258 |
| GPX1 | 0.6546 | HCK | 0.5286 | CDH6 | 0.4586 | TMEM26 | 0.4065 | HKR1 | 0.3633 | CTC-359D24.3 | 0.3257 |
| TEAD4 | 0.6544 | B3GAT3 | 0.5285 | COQ10B | 0.4585 | PIK3R5 | 0.4065 | FBN1 | 0.3633 | ANKH | 0.3256 |
| MOB3A | 0.6542 | BCAT2 | 0.5284 | PCED1A | 0.4585 | CLDN15 | 0.4065 | SRD5A1 | 0.3633 | UQCC1 | 0.3256 |
| MRPL17 | 0.6541 | RP11-805J14.5 | 0.5280 | EIF2B4 | 0.4584 | ICMT | 0.4065 | TAF11 | 0.3633 | SMKR1 | 0.3255 |
| IL10RB | 0.6540 | ICOSLG | 0.5280 | APOL3 | 0.4583 | LACTB | 0.4065 | ITGBL1 | 0.3633 | CCDC71 | 0.3255 |
| BCAP31 | 0.6540 | TMED4 | 0.5279 | GZMB | 0.4582 | ATPAF2 | 0.4064 | COX4I2 | 0.3632 | LPAR2 | 0.3255 |
| SPI1 | 0.6534 | CD40 | 0.5278 | PIGC | 0.4582 | CYP2S1 | 0.4064 | RPS2P46 | 0.3632 | PLK1 | 0.3255 |
| MED8 | 0.6534 | APOC1 | 0.5278 | EMR1 | 0.4581 | STX11 | 0.4064 | EXOSC10 | 0.3631 | CACTIN-AS1 | 0.3255 |
| CXCR4 | 0.6533 | WIPI2 | 0.5277 | VPS37C | 0.4581 | TMEM261 | 0.4064 | ATR | 0.3631 | RCC2 | 0.3254 |
| MIR210HG | 0.6533 | PEPD | 0.5277 | WDR34 | 0.4581 | HPX | 0.4064 | BZW1 | 0.3631 | SEPW1 | 0.3253 |
| GALM | 0.6530 | IFT43 | 0.5275 | NKAP | 0.4580 | CYTL1 | 0.4063 | IL20RB | 0.3631 | MMEL1 | 0.3253 |
| SPP1 | 0.6529 | CAMK1 | 0.5274 | MRPS18C | 0.4579 | CTC-548K16.1 | 0.4063 | SDK1 | 0.3630 | NDUFB4 | 0.3252 |
| GGT5 | 0.6528 | NAGK | 0.5273 | PIK3CD | 0.4578 | DSE | 0.4063 | ALAS1 | 0.3630 | LSM14A | 0.3252 |
| MICALL2 | 0.6528 | CPQ | 0.5273 | SPPL2A | 0.4578 | PANK2 | 0.4061 | PLCD1 | 0.3630 | INPP5D | 0.3251 |
| APOBEC3C | 0.6526 | FMOD | 0.5273 | PAK4 | 0.4578 | IFT20 | 0.4061 | TFIP11 | 0.3629 | NBAS | 0.3251 |
| COTL1 | 0.6526 | TREM2 | 0.5273 | FBL | 0.4578 | AC108488.4 | 0.4061 | CHERP | 0.3629 | RAG1 | 0.3251 |
| HK3 | 0.6521 | CD164 | 0.5271 | EPHA2 | 0.4577 | FAM188B | 0.4061 | RP4-717I23.3 | 0.3629 | HNRNPF | 0.3251 |
| SERPINB8 | 0.6519 | ERI1 | 0.5270 | IKBKG | 0.4577 | RPS14 | 0.4061 | RP11-61L19.2 | 0.3629 | IQCE | 0.3251 |
| BCKDK | 0.6517 | OGFR | 0.5270 | MOB1A | 0.4576 | CHKB | 0.4061 | ZNF467 | 0.3628 | IQGAP2 | 0.3251 |
| MYO9B | 0.6513 | SH3PXD2B | 0.5270 | AKR7A2 | 0.4576 | RP11-548H3.1 | 0.4060 | SYNM | 0.3627 | HOXB4 | 0.3251 |
| ANXA1 | 0.6512 | TCTN2 | 0.5269 | CHCHD3 | 0.4576 | AC012615.1 | 0.4060 | AC006942.4 | 0.3627 | EEF1E1 | 0.3251 |
| ALG3 | 0.6511 | CORO1B | 0.5269 | IGHG1 | 0.4575 | AMIGO3 | 0.4060 | IFI6 | 0.3627 | CTC-471F3.4 | 0.3250 |
| RP11-680A11.5 | 0.6510 | RRP8 | 0.5269 | TMEM259 | 0.4575 | COMTD1 | 0.4059 | FAM195A | 0.3626 | CTD-2171N6.1 | 0.3250 |
| PIM1 | 0.6508 | CTD-2192J16.22 | 0.5269 | SCYL1 | 0.4574 | FAM72B | 0.4059 | RP11-313P22.1 | 0.3626 | DNMT1 | 0.3249 |
| TMED1 | 0.6503 | ZNF691 | 0.5269 | CTD-2341M24.1 | 0.4574 | NDUFA1 | 0.4059 | DLL4 | 0.3625 | RP11-1094H24.4 | 0.3249 |
| TMEM214 | 0.6500 | CPSF4 | 0.5268 | PRKACA | 0.4573 | CREB3L2 | 0.4059 | EDNRA | 0.3625 | LPHN2 | 0.3249 |
| OSMR | 0.6499 | RGS2 | 0.5267 | ALKBH6 | 0.4573 | FLVCR2 | 0.4058 | AC006978.6 | 0.3625 | EPOR | 0.3249 |
| TMEM158 | 0.6499 | KTI12 | 0.5266 | SSNA1 | 0.4573 | AC096559.1 | 0.4058 | TUBG1 | 0.3625 | MPRIP | 0.3249 |
| NDUFA4L2 | 0.6496 | RPF2 | 0.5265 | CCDC12 | 0.4573 | CREB3L1 | 0.4058 | ADCK3 | 0.3625 | TGFBR1 | 0.3248 |
| COPZ2 | 0.6495 | DLGAP4 | 0.5263 | ZNF480 | 0.4571 | UQCR10 | 0.4056 | HYPK | 0.3625 | TTC39B | 0.3248 |
| UNC93B1 | 0.6492 | GNL2 | 0.5262 | DENND3 | 0.4571 | NUDC | 0.4056 | OAS1 | 0.3625 | ASH2L | 0.3248 |
| ACTN1 | 0.6492 | SPRED3 | 0.5261 | RIT1 | 0.4570 | DHRS4L2 | 0.4056 | GTF2A2 | 0.3624 | ATG16L2 | 0.3247 |
| TPI1 | 0.6489 | ALG5 | 0.5259 | MCM5 | 0.4570 | PDCD2 | 0.4055 | DNAJC5B | 0.3623 | IGFBP1 | 0.3247 |
| DDOST | 0.6487 | ITGA7 | 0.5259 | SNX24 | 0.4570 | RP11-326I11.3 | 0.4055 | KLF6 | 0.3623 | CAPN10 | 0.3247 |
| GNB2 | 0.6484 | TMEM53 | 0.5259 | MS4A7 | 0.4569 | C1orf43 | 0.4055 | TMEM223 | 0.3623 | AP001062.7 | 0.3246 |
| GADD45A | 0.6482 | ARL4A | 0.5259 | RP11-680F8.1 | 0.4568 | H2AFV | 0.4055 | RP11-345J4.5 | 0.3623 | RP11-235E17.6 | 0.3246 |
| NCF4 | 0.6481 | FAS | 0.5258 | MRPL51 | 0.4568 | GTF3C1 | 0.4055 | THOC1 | 0.3623 | RABIF | 0.3246 |
| NAMPT | 0.6479 | RAB3IL1 | 0.5257 | PLGRKT | 0.4567 | CCDC8 | 0.4053 | RPS23 | 0.3622 | RP5-1091N2.9 | 0.3246 |
| P2RX4 | 0.6477 | PSMA7 | 0.5256 | SCNN1B | 0.4566 | MB21D1 | 0.4053 | AC006129.4 | 0.3622 | ZNF341 | 0.3245 |
| TMEM120A | 0.6477 | SLC4A3 | 0.5254 | AKR1B1 | 0.4565 | PIGP | 0.4053 | RP11-379B8.1 | 0.3622 | ERH | 0.3245 |
| SDF2L1 | 0.6471 | UCP2 | 0.5254 | NAPA | 0.4565 | SEC31A | 0.4053 | NOL11 | 0.3622 | FAM160B2 | 0.3245 |
| MFSD12 | 0.6469 | TMEM104 | 0.5252 | DNAJC22 | 0.4565 | UBR4 | 0.4052 | ERAP2 | 0.3622 | TYW3 | 0.3244 |
| PCED1B-AS1 | 0.6468 | SLC35E1 | 0.5252 | ARHGAP17 | 0.4564 | TRPM2 | 0.4052 | PMPCB | 0.3621 | NPC1 | 0.3244 |
| SLC43A3 | 0.6465 | NMRAL1 | 0.5251 | VPS25 | 0.4564 | MGME1 | 0.4051 | NDUFA12 | 0.3621 | FOXC2 | 0.3244 |
| STK10 | 0.6462 | HCCS | 0.5250 | SPRY1 | 0.4563 | RP11-274H2.5 | 0.4050 | ZNF513 | 0.3621 | VPS37B | 0.3244 |
| ADAMTSL4 | 0.6460 | CFH | 0.5249 | BRE | 0.4563 | IQCG | 0.4050 | CDKN2AIPNL | 0.3620 | UBE2G2 | 0.3243 |
| PSME2 | 0.6455 | VDR | 0.5248 | C14orf142 | 0.4563 | HDGFRP2 | 0.4049 | RP11-92K15.3 | 0.3620 | RNF14 | 0.3243 |
| EIF3B | 0.6452 | RDH5 | 0.5248 | CDR2 | 0.4563 | MRPL24 | 0.4049 | C3orf38 | 0.3620 | RPS27A | 0.3243 |
| SHC1 | 0.6450 | JUN | 0.5248 | SCPEP1 | 0.4563 | PLRG1 | 0.4048 | HNRNPM | 0.3620 | XRCC5 | 0.3243 |
| BAK1 | 0.6443 | GSC | 0.5247 | AEN | 0.4562 | RP11-218E20.3 | 0.4048 | LSM2 | 0.3619 | NID1 | 0.3242 |
| FAM86DP | 0.6442 | RP9 | 0.5246 | MRPL47 | 0.4562 | CCDC28A | 0.4048 | IK | 0.3619 | BAG1 | 0.3242 |
| PDIA5 | 0.6440 | LAT2 | 0.5246 | TPST1 | 0.4561 | AURKC | 0.4048 | RP4-639F20.1 | 0.3617 | GOSR2 | 0.3242 |
| BET1L | 0.6439 | C7orf49 | 0.5246 | EFHC1 | 0.4561 | FST | 0.4048 | C5orf56 | 0.3617 | RP4-673M15.1 | 0.3241 |
| NOL3 | 0.6438 | C19orf53 | 0.5245 | NT5DC2 | 0.4560 | WASH7P | 0.4047 | AHR | 0.3617 | CLRN3 | 0.3241 |
| GGN | 0.6436 | CRNKL1 | 0.5245 | RPL39L | 0.4560 | SULT2B1 | 0.4047 | SNHG5 | 0.3616 | CCDC74B | 0.3241 |
| HSPG2 | 0.6435 | RND3 | 0.5244 | MANBA | 0.4559 | FTSJ3 | 0.4047 | ODF2 | 0.3616 | PTP4A2 | 0.3241 |
| TYROBP | 0.6434 | MXRA7 | 0.5243 | SLC16A13 | 0.4559 | FARS2 | 0.4047 | AC004257.3 | 0.3616 | TRIM61 | 0.3240 |
| TAX1BP3 | 0.6433 | PUS1 | 0.5242 | UPK3BL | 0.4558 | CTD-2020K17.1 | 0.4046 | SART1 | 0.3616 | GPER1 | 0.3240 |
| GNA15 | 0.6426 | RP11-524D16__A.3 | 0.5241 | ECHDC2 | 0.4558 | CAPZA1 | 0.4046 | ALDH7A1 | 0.3616 | RP5-836N10.1 | 0.3239 |
| TAPBPL | 0.6425 | PPDPF | 0.5238 | TIMM44 | 0.4558 | STUB1 | 0.4046 | KRT86 | 0.3615 | ITM2B | 0.3239 |
| MMP14 | 0.6424 | TXNDC15 | 0.5237 | AC007879.7 | 0.4558 | AC092299.8 | 0.4045 | SPRED2 | 0.3615 | SBDSP1 | 0.3239 |
| MRPS12 | 0.6423 | SRF | 0.5236 | CLN5 | 0.4557 | FBXO42 | 0.4045 | DOCK7 | 0.3614 | CCDC19 | 0.3239 |
| TUBA1C | 0.6422 | TBL2 | 0.5236 | FJX1 | 0.4556 | SRSF7 | 0.4044 | CCDC159 | 0.3614 | HELZ2 | 0.3238 |
| HLA-A | 0.6419 | ZBTB42 | 0.5235 | FAM181A | 0.4555 | LSM4 | 0.4044 | IDH3B | 0.3614 | IRF9 | 0.3238 |
| IMPDH1 | 0.6417 | STK17A | 0.5234 | PHKA2 | 0.4555 | RHPN2 | 0.4043 | PRDX5 | 0.3613 | SRGAP2 | 0.3238 |
| FCER1G | 0.6415 | HEATR2 | 0.5232 | RPL27A | 0.4554 | LINC00116 | 0.4043 | ANAPC15 | 0.3613 | CDK5 | 0.3238 |
| LRRC25 | 0.6415 | FOXS1 | 0.5231 | DLGAP1-AS1 | 0.4554 | ZCCHC10 | 0.4043 | CYCS | 0.3613 | NEDD4L | 0.3237 |
| VASP | 0.6411 | MICA | 0.5231 | STOML2 | 0.4554 | FLAD1 | 0.4042 | NDUFB11 | 0.3612 | CFDP1 | 0.3237 |
| COL5A1 | 0.6409 | MINOS1 | 0.5231 | HEXIM1 | 0.4554 | AXIN1 | 0.4042 | CYB5B | 0.3612 | BTN2A3P | 0.3237 |
| VMO1 | 0.6408 | DOK2 | 0.5229 | GIPC1 | 0.4553 | CCDC125 | 0.4042 | RP5-1136G13.2 | 0.3612 | RECQL5 | 0.3237 |
| FBP1 | 0.6405 | TRIM47 | 0.5228 | CTHRC1 | 0.4552 | LILRA2 | 0.4042 | ZNF746 | 0.3612 | TCEAL8 | 0.3237 |
| TMEM176B | 0.6404 | ACP5 | 0.5227 | PPIH | 0.4551 | BRF2 | 0.4041 | ZMYND19 | 0.3612 | TRIM6 | 0.3237 |
| BIN3 | 0.6401 | RFTN1 | 0.5227 | AC027612.6 | 0.4551 | ESAM | 0.4041 | NRROS | 0.3611 | TRAFD1 | 0.3236 |
| NFKB2 | 0.6401 | KDELC2 | 0.5226 | PSAP | 0.4550 | PGF | 0.4040 | CPT2 | 0.3611 | AGPAT9 | 0.3236 |
| ALDH3B1 | 0.6400 | SNHG17 | 0.5225 | C1orf174 | 0.4550 | ZNF530 | 0.4040 | CSNK2A2 | 0.3610 | DHX30 | 0.3236 |
| CRELD2 | 0.6399 | ALKBH3 | 0.5223 | ETF1 | 0.4549 | AP1B1 | 0.4040 | NPM1 | 0.3610 | RP11-505K9.1 | 0.3235 |
| ITGA3 | 0.6398 | KCNQ1 | 0.5223 | TOR2A | 0.4549 | QTRT1 | 0.4039 | DUSP12 | 0.3609 | PNRC2 | 0.3235 |
| CA9 | 0.6397 | IFNAR2 | 0.5221 | CACTIN | 0.4549 | PSMD7 | 0.4039 | TFPI | 0.3608 | ATP6V1B2 | 0.3235 |
| TBXA2R | 0.6397 | GFPT2 | 0.5220 | KCP | 0.4548 | FNDC3B | 0.4039 | PDGFB | 0.3608 | CADM1 | 0.3235 |
| CSF1 | 0.6396 | RPS6KA1 | 0.5219 | MKNK1 | 0.4547 | SLC25A6 | 0.4039 | RP11-325F22.2 | 0.3608 | AC156455.1 | 0.3235 |
| H2AFJ | 0.6394 | DDX41 | 0.5218 | ADAP2 | 0.4547 | THADA | 0.4039 | TMEM5 | 0.3608 | ZBTB7A | 0.3235 |
| CD163 | 0.6393 | OVCA2 | 0.5217 | ACTN4 | 0.4547 | ATPIF1 | 0.4039 | RP11-863P13.3 | 0.3608 | RAB11B | 0.3234 |
| GNAI2 | 0.6392 | SLC12A9 | 0.5217 | PLEK | 0.4546 | TCEB2 | 0.4038 | CCDC149 | 0.3607 | FITM1 | 0.3234 |
| SUMF1 | 0.6390 | ESYT1 | 0.5215 | AC109826.1 | 0.4546 | ASF1B | 0.4038 | AJUBA | 0.3607 | PTDSS1 | 0.3234 |
| C1orf162 | 0.6386 | LCP1 | 0.5215 | AC092295.7 | 0.4546 | NSUN5P2 | 0.4038 | TMEM132E | 0.3607 | IDH1-AS1 | 0.3234 |
| CFLAR | 0.6383 | FBXO17 | 0.5214 | LZTS1 | 0.4544 | DSN1 | 0.4037 | CTC-575D19.1 | 0.3606 | URAHP | 0.3233 |
| CCL26 | 0.6383 | TNFSF12 | 0.5214 | NDUFA3 | 0.4544 | DYNLRB1 | 0.4037 | RP11-734K2.4 | 0.3606 | PEX14 | 0.3233 |
| CHI3L2 | 0.6381 | ADPGK | 0.5214 | RP11-1008C21.1 | 0.4543 | TEAD2 | 0.4037 | SERGEF | 0.3606 | RSL1D1 | 0.3233 |
| WAS | 0.6381 | NKG7 | 0.5214 | WDR55 | 0.4543 | FAM120AOS | 0.4037 | MYPOP | 0.3606 | GS1-600G8.5 | 0.3232 |
| TPM4 | 0.6380 | TMEM138 | 0.5213 | ZP3 | 0.4543 | RP11-977G19.11 | 0.4036 | UTP3 | 0.3605 | RP13-270P17.3 | 0.3232 |
| LTBP3 | 0.6379 | RIPK3 | 0.5211 | TFB1M | 0.4542 | MRPL9 | 0.4036 | C17orf70 | 0.3605 | RPS27 | 0.3232 |
| GDF15 | 0.6374 | ZNF761 | 0.5209 | VEGFB | 0.4541 | PTPN22 | 0.4036 | TPPP3 | 0.3604 | ZAR1 | 0.3232 |
| NECAP2 | 0.6372 | C12orf45 | 0.5209 | GNG12 | 0.4541 | NDUFA10 | 0.4035 | RPSA | 0.3604 | SLC35F2 | 0.3232 |
| PIEZO1 | 0.6372 | CCR1 | 0.5209 | ATG4B | 0.4540 | SPCS3 | 0.4034 | MYL7 | 0.3603 | MFSD2A | 0.3232 |
| NMI | 0.6367 | PPP1R13L | 0.5209 | CITED2 | 0.4540 | PTCRA | 0.4034 | CTD-2035E11.4 | 0.3603 | RP11-1149O23.3 | 0.3231 |
| MFSD5 | 0.6365 | SLC3A2 | 0.5208 | RPF1 | 0.4540 | RP11-705C15.2 | 0.4034 | CDIPT | 0.3603 | EXOSC8 | 0.3230 |
| PYCARD | 0.6364 | LEPROT | 0.5208 | RELT | 0.4539 | NDUFA11 | 0.4034 | TMEM39A | 0.3602 | ADAMTS9-AS2 | 0.3229 |
| GSDMD | 0.6363 | TNNI2 | 0.5208 | SRD5A3 | 0.4539 | RP11-49I11.1 | 0.4033 | TRA2A | 0.3602 | DNAJC7 | 0.3228 |
| RNF135 | 0.6363 | PCOLCE2 | 0.5208 | CDC25B | 0.4538 | KCTD9 | 0.4033 | VCL | 0.3601 | CENPA | 0.3228 |
| PTPN7 | 0.6363 | CD53 | 0.5208 | RP11-73M18.8 | 0.4537 | CTSS | 0.4033 | LRRC28 | 0.3601 | RPL6P27 | 0.3226 |
| ICAM1 | 0.6361 | S100A3 | 0.5206 | GLRX2 | 0.4536 | HS3ST3A1 | 0.4032 | SCARB1 | 0.3601 | ZNF684 | 0.3225 |
| SLPI | 0.6360 | TMEM161A | 0.5205 | CCDC106 | 0.4536 | KLHDC8A | 0.4032 | MAST2 | 0.3601 | PTGER2 | 0.3225 |
| ETHE1 | 0.6358 | GBP1 | 0.5205 | CHMP4A | 0.4536 | FAM72A | 0.4031 | TRIM45 | 0.3600 | GTPBP10 | 0.3225 |
| TNKS1BP1 | 0.6355 | CLIC4 | 0.5205 | GUK1 | 0.4536 | WDR66 | 0.4031 | C17orf53 | 0.3600 | ANKRD54 | 0.3225 |
| RILPL2 | 0.6353 | DHDDS | 0.5205 | TRAM2 | 0.4536 | RP11-10C24.1 | 0.4031 | HMGB2 | 0.3600 | RBAKDN | 0.3224 |
| ZFP36L2 | 0.6352 | NAIF1 | 0.5204 | MRPL55 | 0.4535 | SLC25A26 | 0.4030 | SUPT4H1 | 0.3600 | RP11-488C13.5 | 0.3224 |
| C10orf10 | 0.6351 | CYB5R1 | 0.5202 | RUNX3 | 0.4535 | L3HYPDH | 0.4030 | ZGLP1 | 0.3600 | EED | 0.3224 |
| PRKD2 | 0.6350 | GPR65 | 0.5201 | CUL1 | 0.4533 | ATG12 | 0.4030 | CCT6P3 | 0.3599 | RP11-298I3.5 | 0.3224 |
| GPX8 | 0.6350 | IL2RA | 0.5198 | NENF | 0.4533 | NDUFAF4 | 0.4029 | GTF2B | 0.3599 | OLFML1 | 0.3223 |
| STAB1 | 0.6350 | DHX34 | 0.5197 | RBBP8 | 0.4533 | RING1 | 0.4029 | RP11-742N3.1 | 0.3599 | FBXW2 | 0.3223 |
| NANS | 0.6349 | ESM1 | 0.5197 | SF3B4 | 0.4532 | AC083799.1 | 0.4029 | AC016739.2 | 0.3599 | CRYGS | 0.3223 |
| TMEM256-PLSCR3 | 0.6349 | COQ2 | 0.5197 | DDX19B | 0.4532 | CXCL10 | 0.4029 | TOMM34 | 0.3599 | DDIT4L | 0.3223 |
| FUCA2 | 0.6348 | SIKE1 | 0.5196 | STRA6 | 0.4532 | CROT | 0.4029 | RP6-109B7.3 | 0.3599 | GPRIN3 | 0.3222 |
| ARL4C | 0.6347 | CLN6 | 0.5196 | RP11-452F19.3 | 0.4531 | DDX31 | 0.4028 | DPEP2 | 0.3599 | DRG1 | 0.3222 |
| FBLIM1 | 0.6345 | GNGT2 | 0.5195 | SLC6A6 | 0.4529 | C6orf62 | 0.4028 | EIF2B1 | 0.3599 | RAD54L | 0.3221 |
| COL1A1 | 0.6340 | AP1M1 | 0.5192 | NME4 | 0.4528 | RNF26 | 0.4027 | AC074212.6 | 0.3598 | RP5-1180E21.5 | 0.3221 |
| C15orf48 | 0.6339 | QARS | 0.5190 | RP11-268J15.5 | 0.4528 | TMED2 | 0.4027 | GRAP | 0.3598 | VNN3 | 0.3221 |
| DPP9 | 0.6337 | LSM5 | 0.5190 | MYL5 | 0.4528 | RP11-473M20.16 | 0.4027 | AP000692.10 | 0.3598 | LINC00685 | 0.3221 |
| SGSH | 0.6337 | DUSP3 | 0.5190 | IGLC3 | 0.4528 | NDUFV2 | 0.4027 | IGDCC4 | 0.3598 | RP11-362F19.1 | 0.3221 |
| ZNF394 | 0.6336 | THOC6 | 0.5190 | CCDC22 | 0.4527 | WDR25 | 0.4026 | SPA17 | 0.3598 | TMOD1 | 0.3220 |
| CIB1 | 0.6335 | ZNF579 | 0.5189 | MRPL54 | 0.4527 | LINC00346 | 0.4026 | INTS10 | 0.3597 | CHKB-AS1 | 0.3220 |
| CD68 | 0.6332 | LURAP1L | 0.5189 | RPLP2 | 0.4526 | PSMG3-AS1 | 0.4025 | ANKRD42 | 0.3597 | BNIP2 | 0.3219 |
| FHOD1 | 0.6331 | BIRC3 | 0.5189 | SYK | 0.4526 | RPL14 | 0.4025 | LAMTOR3 | 0.3597 | LINC00327 | 0.3219 |
| SERPINB1 | 0.6331 | GPN1 | 0.5189 | LIMK1 | 0.4526 | CTA-384D8.35 | 0.4025 | AC009403.2 | 0.3597 | SPG7 | 0.3219 |
| C17orf62 | 0.6331 | CARD9 | 0.5187 | EIF2AK4 | 0.4525 | ADCY3 | 0.4024 | ZNF200 | 0.3597 | INHBA | 0.3219 |
| MAFF | 0.6329 | MYO1E | 0.5185 | TACC3 | 0.4525 | RARA | 0.4023 | GPATCH3 | 0.3596 | GXYLT1 | 0.3219 |
| PTX3 | 0.6328 | ST8SIA4 | 0.5185 | CYTH4 | 0.4525 | IL23A | 0.4023 | FANK1 | 0.3596 | SLC19A3 | 0.3218 |
| PTPN6 | 0.6328 | TMEM59 | 0.5184 | AGA | 0.4524 | MCAT | 0.4022 | SAMD9 | 0.3596 | KIAA0141 | 0.3218 |
| IRAK1 | 0.6328 | TMEM50A | 0.5184 | RP11-686D22.4 | 0.4523 | PIDD | 0.4021 | DGKA | 0.3595 | BLZF1 | 0.3217 |
| APOBEC3G | 0.6328 | S100A13 | 0.5183 | APBA3 | 0.4523 | ADORA1 | 0.4021 | TXNRD3 | 0.3595 | RP11-303E16.2 | 0.3217 |
| MAN2B1 | 0.6326 | MRPL20 | 0.5183 | RNASEH2C | 0.4522 | MPLKIP | 0.4021 | FAM87B | 0.3595 | KIAA1522 | 0.3217 |
| TMUB1 | 0.6325 | CCR5 | 0.5183 | RP11-386G11.10 | 0.4522 | PERP | 0.4020 | ST20-MTHFS | 0.3594 | PTPRC | 0.3216 |
| ECM1 | 0.6316 | MAP3K8 | 0.5182 | MAD2L2 | 0.4521 | C17orf89 | 0.4020 | ACAA1 | 0.3594 | C9orf16 | 0.3216 |
| GAPDH | 0.6315 | CNN1 | 0.5179 | KARS | 0.4521 | RNF167 | 0.4020 | FUT4 | 0.3594 | NPW | 0.3216 |
| RPN1 | 0.6315 | LRRC42 | 0.5178 | NFKBIZ | 0.4521 | GBP1P1 | 0.4020 | MYBPC3 | 0.3593 | MYO15B | 0.3216 |
| IFITM2 | 0.6310 | NR1H2 | 0.5178 | CD109 | 0.4521 | TBC1D9B | 0.4019 | NEURL2 | 0.3593 | EBF2 | 0.3216 |
| CCDC102A | 0.6307 | PRMT1 | 0.5178 | POP7 | 0.4520 | GAK | 0.4019 | DHX32 | 0.3593 | PPM1J | 0.3215 |
| FSTL3 | 0.6305 | KIFC3 | 0.5177 | RP11-47I22.2 | 0.4520 | OASL | 0.4019 | ARHGAP29 | 0.3593 | RP11-400F19.6 | 0.3215 |
| TAPSAR1 | 0.6304 | TSTA3 | 0.5176 | UBA7 | 0.4520 | FSCN2 | 0.4019 | PAM16 | 0.3593 | UBXN8 | 0.3215 |
| OLFML2B | 0.6303 | HSD17B10 | 0.5174 | AC010327.2 | 0.4519 | THOC5 | 0.4019 | CTC-273B12.8 | 0.3592 | MSRA | 0.3214 |
| TAPBP | 0.6301 | AC026806.2 | 0.5173 | FTH1P10 | 0.4519 | BAG6 | 0.4018 | RBM7 | 0.3592 | SUB1 | 0.3214 |
| MXRA8 | 0.6299 | UFSP1 | 0.5168 | CHCHD2 | 0.4518 | RP11-378A13.2 | 0.4018 | TLCD1 | 0.3591 | TMEM165 | 0.3213 |
| SHKBP1 | 0.6299 | MYD88 | 0.5168 | SMYD2 | 0.4517 | LHB | 0.4017 | SEMA4B | 0.3590 | YIPF5 | 0.3213 |
| SLC9A1 | 0.6298 | B3GNT5 | 0.5168 | PTMA | 0.4517 | COL7A1 | 0.4016 | ATP5D | 0.3590 | RPL12P4 | 0.3213 |
| MALSU1 | 0.6298 | COMMD5 | 0.5167 | SIGLEC16 | 0.4516 | UNC13D | 0.4016 | MMP23B | 0.3590 | WDFY4 | 0.3213 |
| ACOT9 | 0.6297 | DAZAP1 | 0.5167 | TCEB1 | 0.4516 | TCEB3 | 0.4016 | TBL3 | 0.3589 | SMN1 | 0.3213 |
| PROS1 | 0.6296 | DYRK3 | 0.5167 | CD2 | 0.4513 | UTP6 | 0.4016 | HCFC1 | 0.3589 | GPR55 | 0.3212 |
| TMSB4X | 0.6296 | KRT8 | 0.5166 | RNF130 | 0.4513 | NUMB | 0.4016 | RNASEL | 0.3588 | LINC00892 | 0.3212 |
| SH3D21 | 0.6295 | RPS6KB2 | 0.5166 | CITF22-1A6.3 | 0.4513 | INSIG2 | 0.4015 | COG7 | 0.3588 | ZNF525 | 0.3212 |
| CALD1 | 0.6292 | RFXANK | 0.5165 | ALKBH5 | 0.4512 | RP11-254F7.3 | 0.4015 | INO80C | 0.3588 | SNHG8 | 0.3211 |
| HLA-E | 0.6291 | GPR183 | 0.5163 | NUMBL | 0.4512 | SARS | 0.4014 | CALML6 | 0.3587 | RAB11A | 0.3211 |
| XBP1 | 0.6290 | HECTD3 | 0.5160 | SMPDL3A | 0.4512 | DPYD | 0.4014 | CXXC5 | 0.3587 | DNAJA1 | 0.3211 |
| GPC1 | 0.6289 | RP11-986E7.7 | 0.5159 | PPP1R37 | 0.4512 | MZT2B | 0.4013 | CYB5R2 | 0.3586 | C14orf182 | 0.3211 |
| IKBKE | 0.6289 | BTN3A2 | 0.5158 | USE1 | 0.4511 | AIMP1 | 0.4012 | MALL | 0.3586 | GAS5 | 0.3211 |
| CCL2 | 0.6288 | CD52 | 0.5157 | MROH6 | 0.4511 | ANKRD22 | 0.4012 | PPP3CC | 0.3585 | FPGT | 0.3211 |
| RER1 | 0.6286 | TK1 | 0.5157 | MRPS11 | 0.4510 | ITGA11 | 0.4012 | EBPL | 0.3585 | RPL5 | 0.3210 |
| HLA-B | 0.6282 | APOBEC3D | 0.5156 | CHPT1 | 0.4509 | AP3D1 | 0.4011 | SBSN | 0.3584 | BCDIN3D | 0.3210 |
| OGFOD3 | 0.6281 | MEPCE | 0.5156 | SNF8 | 0.4509 | FANCF | 0.4011 | CLTB | 0.3584 | LPL | 0.3210 |
| SERPINA3 | 0.6279 | RP3-395M20.8 | 0.5155 | SPCS1 | 0.4508 | C12orf10 | 0.4011 | LINC00961 | 0.3584 | CD8A | 0.3210 |
| NCF1 | 0.6279 | PSMA5 | 0.5155 | NINJ1 | 0.4508 | NFKBID | 0.4011 | CTD-3184A7.4 | 0.3583 | IMP3 | 0.3210 |
| PPIC | 0.6277 | SRRT | 0.5154 | ALYREF | 0.4507 | COA4 | 0.4010 | APTX | 0.3583 | UFC1 | 0.3210 |
| GLA | 0.6276 | GTF2IRD2 | 0.5153 | USP15 | 0.4507 | ZMIZ1-AS1 | 0.4010 | PMF1 | 0.3581 | CDC42EP2 | 0.3210 |
| RNASE2 | 0.6275 | ARAP3 | 0.5153 | FDX1L | 0.4507 | DNAJC21 | 0.4010 | NEDD8 | 0.3580 | RRS1 | 0.3209 |
| CAST | 0.6272 | ATP6V1F | 0.5153 | CTTN | 0.4506 | ARMC10 | 0.4010 | RP5-864K19.4 | 0.3580 | RP11-95P2.1 | 0.3208 |
| SLC2A4RG | 0.6271 | CDC26 | 0.5153 | ARF5 | 0.4505 | CERS2 | 0.4010 | RNF34 | 0.3580 | MIA | 0.3208 |
| ANXA5 | 0.6269 | NUBP1 | 0.5152 | TNFSF4 | 0.4505 | TCTA | 0.4009 | FAM86C2P | 0.3580 | PGBD2 | 0.3207 |
| LOXL2 | 0.6269 | LTB4R | 0.5152 | KDELC1 | 0.4505 | TSLP | 0.4009 | FAM156B | 0.3580 | RP13-977J11.2 | 0.3207 |
| YIPF1 | 0.6269 | AC021016.6 | 0.5150 | S1PR3 | 0.4504 | CTU2 | 0.4009 | RP4-761J14.10 | 0.3580 | HIBADH | 0.3206 |
| ATP6V0E1 | 0.6267 | LEMD2 | 0.5150 | CDCA4 | 0.4503 | SBF2-AS1 | 0.4008 | AGPAT1 | 0.3580 | TRIM65 | 0.3206 |
| NUDT19 | 0.6266 | LAPTM4A | 0.5150 | C19orf54 | 0.4503 | TTLL3 | 0.4008 | SLC35D1 | 0.3579 | AP1S1 | 0.3205 |
| S100A8 | 0.6265 | CLEC4A | 0.5149 | RPS16 | 0.4502 | CCNG1 | 0.4007 | RPLP0P6 | 0.3579 | FGF11 | 0.3204 |
| ARHGDIB | 0.6264 | RAD23A | 0.5148 | PSMD11 | 0.4501 | CHCHD10 | 0.4007 | MICB | 0.3579 | PCSK4 | 0.3204 |
| BCL2A1 | 0.6259 | C1orf86 | 0.5148 | C14orf119 | 0.4501 | SUMO3 | 0.4006 | INPPL1 | 0.3579 | SLC23A3 | 0.3204 |
| ORMDL2 | 0.6258 | TCTN1 | 0.5148 | LEF1 | 0.4499 | RBAK | 0.4005 | RP11-38P22.2 | 0.3578 | STIP1 | 0.3204 |
| UBE2J2 | 0.6257 | SERPINF1 | 0.5147 | SLC25A38 | 0.4498 | C19orf81 | 0.4003 | MFAP1 | 0.3578 | ODF2L | 0.3203 |
| SECTM1 | 0.6255 | EXOC3L1 | 0.5145 | U91328.20 | 0.4498 | HARS | 0.4003 | FGFR1 | 0.3577 | TMEM9B | 0.3203 |
| ZFAND2A | 0.6255 | FAM43B | 0.5145 | UBE2B | 0.4497 | HS3ST3B1 | 0.4003 | ADIPOR1 | 0.3576 | ABHD8 | 0.3203 |
| C19orf24 | 0.6252 | RPS27L | 0.5144 | GCC1 | 0.4497 | ADI1 | 0.4003 | MRPL44 | 0.3576 | ABCB6 | 0.3202 |
| ATRAID | 0.6251 | GPX7 | 0.5144 | SNAP23 | 0.4497 | TNXB | 0.4002 | UFSP2 | 0.3576 | RHEB | 0.3202 |
| TP53I13 | 0.6251 | VWA1 | 0.5144 | RAI14 | 0.4497 | C1orf122 | 0.4001 | RPL19 | 0.3575 | SFXN5 | 0.3202 |
| RCN1 | 0.6251 | RP11-108M9.4 | 0.5143 | FHL2 | 0.4496 | CITF22-92A6.1 | 0.3999 | IL1A | 0.3575 | HSD17B11 | 0.3202 |
| RNASET2 | 0.6248 | BRK1 | 0.5142 | ERGIC1 | 0.4495 | BAD | 0.3999 | ELP6 | 0.3575 | CCDC153 | 0.3201 |
| MT1L | 0.6248 | DUSP5 | 0.5142 | RPUSD1 | 0.4494 | PTPMT1 | 0.3999 | SLC30A6 | 0.3575 | CHD8 | 0.3201 |
| PPP1CA | 0.6246 | SASH3 | 0.5141 | MGMT | 0.4494 | TFPI2 | 0.3998 | PGAM2 | 0.3574 | SLC16A10 | 0.3201 |
| FLII | 0.6242 | RPS19 | 0.5141 | RP11-395B7.4 | 0.4494 | RP11-356I2.4 | 0.3998 | SIAE | 0.3574 | NSUN5P1 | 0.3201 |
| ARHGDIA | 0.6242 | FAM86EP | 0.5140 | E2F4 | 0.4494 | RP5-1120P11.1 | 0.3998 | SUCLG2 | 0.3573 | RP11-747H7.3 | 0.3200 |
| ATP8B3 | 0.6242 | PSORS1C1 | 0.5139 | CLASRP | 0.4493 | LSM12 | 0.3997 | SOAT1 | 0.3573 | PTRHD1 | 0.3200 |
| RAB34 | 0.6236 | EPS8L2 | 0.5139 | RP5-977B1.11 | 0.4493 | NUDT18 | 0.3997 | FLYWCH2 | 0.3573 | PUS3 | 0.3199 |
| CXCL16 | 0.6234 | LILRB4 | 0.5139 | SELM | 0.4493 | MZF1 | 0.3997 | CTC-378H22.1 | 0.3572 | TMEM62 | 0.3199 |
| PSMG3 | 0.6234 | MAFK | 0.5139 | RASSF7 | 0.4493 | HADHA | 0.3996 | F2RL3 | 0.3571 | ANKRD53 | 0.3199 |
| GAA | 0.6230 | ZNF865 | 0.5138 | IL10RA | 0.4492 | EVC2 | 0.3995 | ETNK2 | 0.3571 | CDH23 | 0.3199 |
| IQGAP1 | 0.6229 | P2RY6 | 0.5137 | HRAS | 0.4492 | IFT52 | 0.3995 | RP11-47I22.3 | 0.3571 | ZMYND10 | 0.3199 |
| WDR1 | 0.6229 | GALE | 0.5136 | FRG1 | 0.4490 | ZNF653 | 0.3995 | GNL3 | 0.3571 | HAT1 | 0.3199 |
| POR | 0.6227 | SEC11A | 0.5136 | DNLZ | 0.4489 | EIF2AK1 | 0.3994 | COLEC12 | 0.3571 | RASL11A | 0.3198 |
| EIF4EBP1 | 0.6224 | RP11-373D23.3 | 0.5133 | POLR2E | 0.4489 | SCG2 | 0.3993 | RNF214 | 0.3571 | EGFL7 | 0.3198 |
| DRAM1 | 0.6223 | EFNA1 | 0.5133 | ASAP3 | 0.4489 | CLDN1 | 0.3992 | CEBPZ | 0.3571 | SAYSD1 | 0.3198 |
| SQSTM1 | 0.6222 | CITED1 | 0.5133 | CD300LF | 0.4489 | CTD-2006K23.1 | 0.3992 | TM2D1 | 0.3569 | ADAM28 | 0.3196 |
| UNC45A | 0.6222 | PRKRIP1 | 0.5133 | POFUT2 | 0.4489 | RP11-96D1.11 | 0.3991 | FAM65A | 0.3569 | PTOV1-AS1 | 0.3196 |
| DNASE2 | 0.6222 | IAH1 | 0.5133 | WDR54 | 0.4488 | CSF1R | 0.3991 | ERN1 | 0.3569 | LLGL2 | 0.3196 |
| MTHFD1L | 0.6221 | SNX17 | 0.5132 | SCAMP4 | 0.4488 | SVIL | 0.3991 | DNPH1 | 0.3569 | ZNF789 | 0.3196 |
| RGS19 | 0.6220 | ABHD15 | 0.5131 | ABCC1 | 0.4488 | CSF3 | 0.3990 | PRADC1 | 0.3569 | FBXO46 | 0.3195 |
| TRIM21 | 0.6219 | RNPEP | 0.5130 | SPATA33 | 0.4488 | TMEM141 | 0.3989 | RP11-273B20.1 | 0.3569 | ST3GAL3 | 0.3195 |
| SLC15A3 | 0.6219 | NOP16 | 0.5129 | ANKRD13D | 0.4487 | C17orf58 | 0.3989 | XAB2 | 0.3569 | TAX1BP1 | 0.3195 |
| ALDH16A1 | 0.6217 | WBP1LP2 | 0.5128 | PHB | 0.4487 | TREML1 | 0.3989 | RP11-178L8.4 | 0.3568 | C11orf68 | 0.3195 |
| IGFBP3 | 0.6217 | EXT2 | 0.5128 | MFGE8 | 0.4487 | RNF126 | 0.3989 | PGAP2 | 0.3568 | RBX1 | 0.3195 |
| CATSPER1 | 0.6216 | TMEM101 | 0.5128 | PIGU | 0.4486 | HN1L | 0.3988 | FHAD1 | 0.3568 | ADAMTSL1 | 0.3195 |
| SEPN1 | 0.6214 | SLC2A10 | 0.5128 | EMP1 | 0.4486 | FAU | 0.3987 | STX2 | 0.3567 | SYTL1 | 0.3194 |
| NCLN | 0.6213 | PSMB3 | 0.5127 | GRPEL1 | 0.4486 | FYCO1 | 0.3987 | HES2 | 0.3567 | NPAS1 | 0.3194 |
| G6PD | 0.6210 | NFIL3 | 0.5126 | MMP24-AS1 | 0.4485 | SLC12A4 | 0.3986 | MZT2A | 0.3567 | C6orf203 | 0.3193 |
| RFT1 | 0.6210 | HSPB6 | 0.5126 | RPS28 | 0.4485 | ZBTB17 | 0.3986 | COG4 | 0.3566 | RP11-396C23.2 | 0.3193 |
| KYNU | 0.6208 | RELA | 0.5125 | PTGR1 | 0.4485 | CAPN12 | 0.3986 | RP11-446E9.2 | 0.3566 | RPGR | 0.3192 |
| NCF1C | 0.6208 | PTTG1IP | 0.5123 | LIN37 | 0.4485 | PRR7 | 0.3985 | TFB2M | 0.3566 | TMEM201 | 0.3192 |
| C1QB | 0.6207 | RUVBL2 | 0.5123 | SPTSSA | 0.4485 | SLC35B3 | 0.3984 | CTD-2537I9.12 | 0.3565 | C1orf167 | 0.3191 |
| ABCD1 | 0.6207 | PLBD1 | 0.5122 | NIT2 | 0.4485 | AKAP12 | 0.3984 | RP11-470E16.1 | 0.3565 | CHFR | 0.3190 |
| TOR4A | 0.6206 | IFFO1 | 0.5120 | DECR2 | 0.4484 | TCF3 | 0.3983 | RP13-890H12.2 | 0.3565 | AC012307.3 | 0.3190 |
| PVR | 0.6205 | SEP15 | 0.5120 | CD300E | 0.4484 | SMIM19 | 0.3982 | RP11-466H18.1 | 0.3565 | LINC00998 | 0.3189 |
| SRGN | 0.6205 | DYNLT1 | 0.5119 | GZMA | 0.4483 | PHF19 | 0.3982 | JDP2 | 0.3565 | ETFDH | 0.3189 |
| PRKCSH | 0.6202 | TBC1D10C | 0.5114 | AD000671.6 | 0.4482 | PRR16 | 0.3981 | RP11-311C24.1 | 0.3564 | SCML1 | 0.3189 |
| SPHK1 | 0.6201 | LOXL3 | 0.5114 | CIC | 0.4482 | RP11-159N11.4 | 0.3981 | METTL17 | 0.3564 | GDF5 | 0.3188 |
| CMTM7 | 0.6201 | CHSY1 | 0.5114 | HTRA1 | 0.4482 | TMEM71 | 0.3981 | WNT5A-AS1 | 0.3564 | ZNF683 | 0.3188 |
| FTH1 | 0.6201 | EXOC3L2 | 0.5113 | C4orf6 | 0.4481 | MIB2 | 0.3980 | CD6 | 0.3564 | RP11-62H7.2 | 0.3188 |
| SP140L | 0.6198 | RP11-838N2.4 | 0.5113 | NPAS2 | 0.4479 | ARFGAP1 | 0.3979 | SYTL4 | 0.3564 | RP11-384K6.2 | 0.3188 |
| C2 | 0.6194 | TGFB3 | 0.5112 | ZBTB48 | 0.4478 | ACAD9 | 0.3979 | CTA-963H5.5 | 0.3563 | C9orf169 | 0.3188 |
| NEU1 | 0.6192 | GPR132 | 0.5110 | RP4-740C4.6 | 0.4478 | KIRREL | 0.3979 | THAP3 | 0.3563 | KHDRBS1 | 0.3188 |
| ETV6 | 0.6191 | SSR1 | 0.5110 | RGS1 | 0.4478 | PARL | 0.3979 | DCAF4 | 0.3562 | BDH2 | 0.3188 |
| IRF1 | 0.6190 | IL15 | 0.5109 | ARHGAP27 | 0.4477 | PALLD | 0.3978 | TMX1 | 0.3562 | C19orf18 | 0.3187 |
| CTDSP1 | 0.6187 | DNALI1 | 0.5109 | SCIMP | 0.4477 | KIAA1429 | 0.3978 | CBY1 | 0.3562 | TAMM41 | 0.3187 |
| NDUFV3 | 0.6179 | MMP7 | 0.5108 | HOXB7 | 0.4477 | YY1 | 0.3978 | AATF | 0.3561 | SRI | 0.3186 |
| EIF4G1 | 0.6179 | USB1 | 0.5107 | ZNF598 | 0.4477 | ATG4D | 0.3978 | RBM45 | 0.3561 | KPNB1 | 0.3186 |
| CAPNS1 | 0.6177 | USP4 | 0.5107 | COX6B1 | 0.4476 | APMAP | 0.3977 | KATNAL2 | 0.3561 | UBLCP1 | 0.3186 |
| IL4I1 | 0.6177 | ISOC2 | 0.5107 | CPNE1 | 0.4476 | RGS14 | 0.3975 | CXCR3 | 0.3561 | ZDHHC6 | 0.3186 |
| CARS | 0.6177 | MRPL4 | 0.5106 | AC004067.5 | 0.4476 | RPL13 | 0.3975 | PIGQ | 0.3561 | TGDS | 0.3185 |
| PPM1M | 0.6177 | LAMC3 | 0.5106 | EMC6 | 0.4476 | NOMO3 | 0.3974 | NME7 | 0.3560 | RPL26 | 0.3185 |
| MGP | 0.6176 | NABP1 | 0.5106 | CD70 | 0.4476 | PRPF4 | 0.3974 | AC069278.4 | 0.3560 | GMPR | 0.3185 |
| SLC8B1 | 0.6174 | LTBP2 | 0.5105 | APOL6 | 0.4475 | AFP | 0.3974 | PSMD14 | 0.3560 | RP11-48B3.4 | 0.3185 |
| RHOG | 0.6172 | TES | 0.5105 | A1BG | 0.4475 | RHOT2 | 0.3973 | PSPN | 0.3560 | MAPKAPK5-AS1 | 0.3184 |
| ANXA2P2 | 0.6172 | CNPY2 | 0.5105 | CCDC23 | 0.4475 | TLE6 | 0.3972 | CLECL1 | 0.3560 | C11orf58 | 0.3184 |
| C11orf24 | 0.6170 | PSMA3 | 0.5105 | LYL1 | 0.4474 | SYMPK | 0.3971 | IDH3G | 0.3559 | NKIRAS2 | 0.3184 |
| ADRM1 | 0.6167 | CCL20 | 0.5104 | RP11-155G14.5 | 0.4474 | GALNT12 | 0.3970 | WRAP73 | 0.3559 | DNAJA3 | 0.3183 |
| LILRB3 | 0.6167 | LLPH | 0.5103 | GPC4 | 0.4474 | HGD | 0.3970 | MFAP4 | 0.3559 | RDH14 | 0.3183 |
| IFRD2 | 0.6166 | CBR3 | 0.5103 | RBM3 | 0.4472 | BTBD6 | 0.3970 | MTIF3 | 0.3559 | KCNMA1 | 0.3182 |
| HSPA7 | 0.6162 | CST7 | 0.5103 | PRPH | 0.4472 | IGF2BP2 | 0.3970 | SEC14L1 | 0.3558 | WASH4P | 0.3182 |
| SIPA1 | 0.6161 | FLOT2 | 0.5102 | ZNF672 | 0.4472 | ADAM19 | 0.3969 | COX7C | 0.3558 | RPL7A | 0.3182 |
| OAZ1 | 0.6160 | TMEM107 | 0.5102 | C2orf81 | 0.4472 | SLC35E4 | 0.3968 | ZNF160 | 0.3557 | LYVE1 | 0.3182 |
| PLIN3 | 0.6158 | TRIB3 | 0.5101 | BIRC2 | 0.4471 | CPSF3L | 0.3968 | MYBL2 | 0.3557 | LDLRAP1 | 0.3181 |
| CLEC5A | 0.6158 | POMP | 0.5101 | SLC25A45 | 0.4471 | LAYN | 0.3968 | ROBO3 | 0.3557 | TMEM61 | 0.3181 |
| SLC35A2 | 0.6157 | HS6ST1 | 0.5100 | FAM96A | 0.4470 | IL11 | 0.3968 | ALG14 | 0.3557 | ADAM33 | 0.3180 |
| LIF | 0.6157 | UBE2Z | 0.5100 | SMTN | 0.4468 | AC124789.1 | 0.3967 | PVRL4 | 0.3557 | MARK3 | 0.3180 |
| ARAF | 0.6155 | CSK | 0.5099 | LAT | 0.4468 | RP11-219G17.4 | 0.3967 | NEIL2 | 0.3557 | SMG5 | 0.3180 |
| FAM46A | 0.6153 | SDCBP | 0.5098 | MLTK | 0.4468 | PSMD5 | 0.3967 | TMEM187 | 0.3556 | MCFD2 | 0.3180 |
| TXLNA | 0.6152 | FLNB | 0.5097 | LRPAP1 | 0.4467 | C16orf13 | 0.3967 | MACF1 | 0.3556 | SPTLC3 | 0.3180 |
| DOCK6 | 0.6152 | ZNF600 | 0.5097 | GTF2F1 | 0.4467 | PNPLA7 | 0.3967 | PWP2 | 0.3556 | WFDC3 | 0.3180 |
| PXN | 0.6150 | CREG1 | 0.5096 | PIGG | 0.4466 | STK16 | 0.3966 | KIRREL2 | 0.3556 | ZNF7 | 0.3180 |
| AP2S1 | 0.6149 | CARM1 | 0.5095 | ERICH1 | 0.4466 | RP5-1021I20.2 | 0.3966 | IQCC | 0.3556 | PCGF5 | 0.3180 |
| PSMD9 | 0.6149 | GAS6 | 0.5095 | CFP | 0.4466 | ARHGAP10 | 0.3966 | RHOD | 0.3555 | SETD1B | 0.3178 |
| CPVL | 0.6146 | RP11-46D6.1 | 0.5095 | RPL18 | 0.4465 | GTPBP6 | 0.3966 | RP11-316O14.1 | 0.3555 | LINC00665 | 0.3178 |
| RFC2 | 0.6145 | GBA | 0.5094 | C17orf49 | 0.4463 | PPP2R1A | 0.3966 | MDM2 | 0.3555 | CXCL9 | 0.3178 |
| TEAD3 | 0.6142 | TGM2 | 0.5093 | PLEKHH3 | 0.4461 | BCKDHA | 0.3965 | EID3 | 0.3554 | FGFBP2 | 0.3178 |
| RP11-290F20.3 | 0.6139 | SIVA1 | 0.5092 | SLC25A20 | 0.4460 | POLA2 | 0.3964 | LARP7 | 0.3554 | HNF4G | 0.3178 |
| CD58 | 0.6137 | MLEC | 0.5090 | ITGAX | 0.4460 | BANF1 | 0.3964 | AC017104.6 | 0.3554 | TMEM14B | 0.3178 |
| LRRC32 | 0.6135 | FKBPL | 0.5089 | FTLP3 | 0.4459 | EIF2S3 | 0.3964 | MRPL16 | 0.3554 | BLMH | 0.3177 |
| HEBP2 | 0.6135 | U2AF1L4 | 0.5089 | SCAF1 | 0.4459 | COA1 | 0.3964 | ZNF814 | 0.3554 | GNA11 | 0.3176 |
| POLR2L | 0.6132 | RPS2 | 0.5087 | RHOH | 0.4459 | ERICH2 | 0.3963 | AL139385.1 | 0.3554 | YBEY | 0.3176 |
| RASSF1 | 0.6131 | PRKAB1 | 0.5086 | MT1A | 0.4458 | LSMD1 | 0.3963 | SNX11 | 0.3554 | AP4B1 | 0.3175 |
| FCGR2B | 0.6129 | LINC00984 | 0.5085 | CTU1 | 0.4458 | CMAHP | 0.3963 | RNF122 | 0.3553 | PRIMPOL | 0.3175 |
| PRSS23 | 0.6127 | POLR2J | 0.5084 | AL590369.1 | 0.4456 | AP000350.4 | 0.3961 | GLTSCR1 | 0.3553 | ATG5 | 0.3174 |
| KIAA0040 | 0.6127 | C9orf69 | 0.5082 | C21orf59 | 0.4456 | EIF2B5 | 0.3961 | NSMAF | 0.3553 | UBE2J1 | 0.3174 |
| NAGLU | 0.6126 | P2RY11 | 0.5082 | ARSI | 0.4456 | ATIC | 0.3960 | ATP5G2 | 0.3552 | ICAM2 | 0.3174 |
| OCIAD2 | 0.6126 | ZNF703 | 0.5079 | MRPL12 | 0.4456 | CTD-2228K2.5 | 0.3959 | LTBP4 | 0.3552 | CXCR6 | 0.3174 |
| SIGLEC7 | 0.6123 | SLC30A5 | 0.5079 | HES1 | 0.4455 | MX2 | 0.3959 | AC145343.2 | 0.3551 | INPP5E | 0.3174 |
| HLA-F | 0.6121 | ERMAP | 0.5079 | RP11-6I2.3 | 0.4453 | COA6 | 0.3959 | MIDN | 0.3551 | HMGN2P5 | 0.3173 |
| IFI35 | 0.6121 | DNAJC3 | 0.5079 | SPRY2 | 0.4453 | TUFM | 0.3959 | DAPP1 | 0.3550 | C14orf169 | 0.3173 |
| RIN3 | 0.6117 | DNAJC2 | 0.5078 | LSM7 | 0.4452 | SMARCD2 | 0.3958 | SERP1 | 0.3550 | CBLN3 | 0.3173 |
| MAN1B1 | 0.6116 | C19orf48 | 0.5076 | URGCP | 0.4450 | TMEM219 | 0.3958 | THBS2 | 0.3549 | TAF15 | 0.3173 |
| EMILIN2 | 0.6116 | CD59 | 0.5075 | NAB2 | 0.4449 | INTS5 | 0.3958 | PCYT1A | 0.3549 | RP11-315A16.1 | 0.3172 |
| STAT5A | 0.6114 | B4GALT4 | 0.5075 | EXOSC4 | 0.4449 | MRPS2 | 0.3958 | PAMR1 | 0.3549 | AIP | 0.3171 |
| TAP1 | 0.6113 | DCBLD2 | 0.5074 | UBL5 | 0.4448 | ZNF688 | 0.3958 | SBDS | 0.3548 | DCLRE1B | 0.3171 |
| NCF1B | 0.6112 | BTG1 | 0.5074 | ECI2 | 0.4448 | SOX18 | 0.3958 | GOLGB1 | 0.3548 | ILF2 | 0.3171 |
| HOMER3 | 0.6110 | ERRFI1 | 0.5073 | ZDHHC7 | 0.4448 | PABPC1 | 0.3957 | SZT2 | 0.3548 | ELP2 | 0.3170 |
| ORAI1 | 0.6110 | TMEM217 | 0.5072 | LAMB3 | 0.4447 | GPS2 | 0.3957 | LIMD2 | 0.3548 | SLC25A11 | 0.3170 |
| BMP1 | 0.6109 | RAP1B | 0.5070 | DGUOK | 0.4447 | EBI3 | 0.3956 | RECK | 0.3548 | RP11-274B18.2 | 0.3170 |
| RNPEPL1 | 0.6109 | TSSC4 | 0.5069 | NSMCE1 | 0.4446 | NRCAM | 0.3956 | HOXA1 | 0.3547 | UBE2H | 0.3170 |
| ARHGAP9 | 0.6107 | EIF5A | 0.5068 | RNF113A | 0.4446 | RALBP1 | 0.3956 | ELTD1 | 0.3546 | CTD-2647L4.5 | 0.3170 |
| PLTP | 0.6106 | CFL1 | 0.5067 | FAM109A | 0.4446 | RASSF5 | 0.3956 | RRP1 | 0.3545 | NDUFS4 | 0.3169 |
| PODNL1 | 0.6103 | PPM1G | 0.5067 | NDUFC1 | 0.4446 | SRSF4 | 0.3955 | ASUN | 0.3545 | RP11-579D7.2 | 0.3169 |
| SNAPC2 | 0.6100 | YTHDF1 | 0.5065 | YARS | 0.4445 | BRD4 | 0.3955 | ACSF3 | 0.3545 | C8G | 0.3168 |
| IL4R | 0.6094 | TPST2 | 0.5064 | ETV2 | 0.4445 | PPP1R3G | 0.3955 | MMADHC | 0.3544 | ACTR3 | 0.3168 |
| FKBP10 | 0.6092 | THAP4 | 0.5063 | RNF144B | 0.4445 | TPK1 | 0.3955 | AIG1 | 0.3544 | GPN3 | 0.3168 |
| SERINC2 | 0.6091 | TMEM86B | 0.5062 | ABHD4 | 0.4445 | CCDC174 | 0.3954 | RP11-157P1.4 | 0.3544 | ANO1 | 0.3168 |
| PRKCDBP | 0.6087 | SMIM12 | 0.5062 | RPL35 | 0.4444 | PKIB | 0.3954 | SAMD9L | 0.3544 | WIZ | 0.3167 |
| NUPR1 | 0.6086 | SEC24D | 0.5061 | HEMK1 | 0.4444 | STYX | 0.3954 | RHBDD3 | 0.3543 | FAM76A | 0.3167 |
| G0S2 | 0.6086 | AGAP2-AS1 | 0.5061 | AC008964.1 | 0.4443 | THAP8 | 0.3953 | TMEM79 | 0.3543 | IGJ | 0.3167 |
| ERP29 | 0.6082 | RABEP2 | 0.5060 | CASP8 | 0.4441 | HERPUD2 | 0.3952 | SNX10 | 0.3541 | RP11-295D4.1 | 0.3167 |
| MFSD7 | 0.6080 | AC093391.2 | 0.5060 | HHLA3 | 0.4441 | RP11-290F20.1 | 0.3952 | SELPLG | 0.3540 | MUTYH | 0.3166 |
| TBC1D1 | 0.6079 | MTMR11 | 0.5059 | LMO2 | 0.4441 | RNASEK-C17orf49 | 0.3951 | INSL3 | 0.3540 | CST3 | 0.3164 |
| RGS3 | 0.6077 | XYLT2 | 0.5059 | B4GALT5 | 0.4441 | CDK7 | 0.3951 | MAPKAPK5 | 0.3540 | NDUFA8 | 0.3164 |
| METTL7B | 0.6077 | ATF3 | 0.5058 | MDH2 | 0.4441 | RFX2 | 0.3951 | PRTN3 | 0.3540 | SERHL2 | 0.3164 |
| APOL2 | 0.6076 | PILRA | 0.5057 | JTB | 0.4440 | CTD-2376I4.2 | 0.3951 | LYPD3 | 0.3539 | LPAR5 | 0.3164 |
| AIF1 | 0.6075 | EBNA1BP2 | 0.5056 | C19orf38 | 0.4440 | GJC1 | 0.3950 | PSKH1 | 0.3538 | PLEKHG1 | 0.3164 |
| ABHD11 | 0.6070 | ACADVL | 0.5055 | ENSA | 0.4439 | STAC | 0.3950 | UBE2C | 0.3538 | EPHB2 | 0.3163 |
| MLKL | 0.6070 | CD48 | 0.5055 | FAM207A | 0.4439 | RINL | 0.3949 | SCARF2 | 0.3538 | HCG4P11 | 0.3162 |
| CDKN1A | 0.6069 | CLU | 0.5054 | CSF3R | 0.4438 | MYEOV2 | 0.3949 | RP4-669L17.8 | 0.3538 | TIMM21 | 0.3162 |
| AC011558.5 | 0.6067 | TFE3 | 0.5054 | CAPS | 0.4438 | EFHD2 | 0.3949 | PNRC1 | 0.3537 | FAHD2B | 0.3161 |
| CSNK1G2 | 0.6065 | ATAD3A | 0.5054 | GIMAP2 | 0.4438 | ACOX2 | 0.3949 | DEDD | 0.3537 | THY1 | 0.3160 |
| BCAM | 0.6064 | TMEM189 | 0.5053 | DPM3 | 0.4438 | PLA2R1 | 0.3949 | BRAP | 0.3537 | ROR2 | 0.3160 |
| SMS | 0.6064 | RAB43 | 0.5053 | RNMTL1 | 0.4436 | CENPW | 0.3949 | EP400NL | 0.3537 | MPHOSPH10 | 0.3160 |
| NRBP1 | 0.6063 | DNAJC4 | 0.5050 | SNRPA | 0.4435 | RPS18 | 0.3949 | HSPH1 | 0.3537 | CDK5RAP2 | 0.3159 |
| PLA2G2A | 0.6063 | DPM2 | 0.5049 | NAA38 | 0.4435 | TBX19 | 0.3949 | GSTM2 | 0.3536 | GTF2H1 | 0.3159 |
| GEMIN7 | 0.6063 | LITAF | 0.5049 | TMEM243 | 0.4434 | PTS | 0.3948 | LAMP2 | 0.3536 | CTC-297N7.5 | 0.3159 |
| MYO1F | 0.6054 | TMEM134 | 0.5049 | TBC1D10B | 0.4434 | RP11-876N24.4 | 0.3948 | TBC1D17 | 0.3536 | AXL | 0.3159 |
| A2M | 0.6054 | ARHGAP30 | 0.5048 | ATP6AP2 | 0.4434 | HAP1 | 0.3948 | ARMC5 | 0.3536 | FIBCD1 | 0.3159 |
| ERGIC3 | 0.6054 | MT1E | 0.5045 | FAM160A2 | 0.4433 | HIGD2A | 0.3948 | RPP40 | 0.3536 | PEX6 | 0.3158 |
| NUDT22 | 0.6052 | VAMP3 | 0.5044 | SDHAF1 | 0.4433 | NXF3 | 0.3947 | ZC3H12D | 0.3536 | SIK1 | 0.3158 |
| TMEM176A | 0.6048 | SLA | 0.5044 | GIMAP4 | 0.4432 | EN1 | 0.3947 | FOXO1 | 0.3535 | TRIM11 | 0.3157 |
| PTGIR | 0.6047 | HLA-DMB | 0.5043 | TCF19 | 0.4432 | PRKAG1 | 0.3947 | MAD2L1BP | 0.3535 | RGS18 | 0.3156 |
| B2M | 0.6046 | EVA1A | 0.5041 | N6AMT2 | 0.4431 | RPL35P2 | 0.3947 | RP11-61L19.3 | 0.3535 | MSL3 | 0.3156 |
| ADAMTS14 | 0.6044 | FZD1 | 0.5041 | ITGB3BP | 0.4431 | NUP88 | 0.3946 | PARK7 | 0.3535 | WDR83 | 0.3155 |
| C3 | 0.6044 | TP53I3 | 0.5041 | FCN3 | 0.4431 | DENND2A | 0.3945 | ABHD12 | 0.3534 | CCDC152 | 0.3155 |
| STX4 | 0.6044 | DNAJC1 | 0.5040 | CD3E | 0.4430 | CTB-13F3.1 | 0.3944 | RP13-516M14.1 | 0.3533 | KCTD12 | 0.3155 |
| TMEM150A | 0.6043 | PTGES | 0.5040 | PLEKHO1 | 0.4430 | ZDHHC3 | 0.3944 | CCNH | 0.3532 | CTD-3088G3.8 | 0.3154 |
| ZDHHC5 | 0.6041 | WDR53 | 0.5039 | CTNS | 0.4430 | AC005083.1 | 0.3943 | APOL4 | 0.3532 | LRAT | 0.3154 |
| MFSD10 | 0.6040 | HEBP1 | 0.5039 | MT1G | 0.4429 | AOC3 | 0.3943 | SNRPD3 | 0.3532 | COX5B | 0.3153 |
| BCL7B | 0.6040 | OSTF1 | 0.5039 | PET100 | 0.4429 | C16orf54 | 0.3943 | C1orf159 | 0.3531 | AGBL2 | 0.3153 |
| PBDC1 | 0.6040 | SIRT6 | 0.5038 | OPLAH | 0.4429 | C21orf33 | 0.3942 | SKAP2 | 0.3531 | PPIAP31 | 0.3153 |
| TPRA1 | 0.6039 | PPAPDC1B | 0.5038 | DDX60L | 0.4429 | RAB7A | 0.3942 | FAM98C | 0.3529 | RP11-82L18.2 | 0.3151 |
| OLFML3 | 0.6036 | TOE1 | 0.5037 | IMP4 | 0.4428 | POLRMT | 0.3942 | OTP | 0.3529 | GEMIN8 | 0.3151 |
| SURF4 | 0.6034 | AIM1 | 0.5037 | TGFB2 | 0.4428 | SMO | 0.3942 | KLHL6 | 0.3529 | E4F1 | 0.3151 |
| FAH | 0.6031 | OGFOD2 | 0.5036 | RFESD | 0.4428 | SNX2 | 0.3941 | RP11-733O18.1 | 0.3529 | NDUFAF7 | 0.3151 |
| SCO2 | 0.6028 | ZDHHC24 | 0.5034 | CBR1 | 0.4427 | ZNF582 | 0.3939 | TEX26 | 0.3528 | RP11-253M7.1 | 0.3151 |
| CSTB | 0.6023 | KRT18 | 0.5033 | HSCB | 0.4426 | SLC16A5 | 0.3939 | USF1 | 0.3527 | PCOLCE-AS1 | 0.3151 |
| FLT3LG | 0.6023 | EIF1 | 0.5032 | UCKL1 | 0.4426 | MTFR1L | 0.3939 | SFPQ | 0.3527 | ZNF470 | 0.3150 |
| SMAGP | 0.6023 | EIF4A3 | 0.5030 | URM1 | 0.4426 | CST6 | 0.3938 | GPR82 | 0.3526 | RP4-706A16.3 | 0.3150 |
| PGLS | 0.6022 | MT1H | 0.5028 | RP11-150O12.6 | 0.4426 | CA5BP1 | 0.3937 | VARS | 0.3526 | GMPS | 0.3150 |
| S100A9 | 0.6021 | PPARD | 0.5028 | PPP1CB | 0.4424 | AC004447.2 | 0.3937 | PRRC2A | 0.3526 | AC017099.3 | 0.3150 |
| REXO2 | 0.6019 | PQLC3 | 0.5027 | TANK | 0.4424 | RP11-138I1.4 | 0.3937 | SIRPB2 | 0.3525 | AC107983.4 | 0.3150 |
| GPI | 0.6019 | PSMB1 | 0.5025 | GIMAP1 | 0.4424 | METTL23 | 0.3937 | PPID | 0.3525 | FH | 0.3149 |
| C8orf58 | 0.6018 | HLA-J | 0.5023 | NUTF2 | 0.4423 | GXYLT2 | 0.3937 | PQLC1 | 0.3525 | RCL1 | 0.3149 |
| RNF181 | 0.6016 | FSTL1 | 0.5023 | CREM | 0.4423 | C6orf47 | 0.3936 | CASP10 | 0.3525 | KLF2 | 0.3148 |
| LPCAT1 | 0.6016 | G6PC3 | 0.5022 | OSBPL5 | 0.4423 | C19orf60 | 0.3936 | EAF1 | 0.3524 | C9orf3 | 0.3148 |
| RP11-61L23.2 | 0.6012 | TMEM140 | 0.5022 | C5AR2 | 0.4423 | ASCL2 | 0.3936 | MIS18A | 0.3524 | GS1-124K5.4 | 0.3148 |
| EFEMP1 | 0.6012 | HPD | 0.5021 | CD34 | 0.4422 | TCTN3 | 0.3936 | ANAPC7 | 0.3524 | RP11-22P6.3 | 0.3148 |
| TXNDC12 | 0.6011 | PUSL1 | 0.5021 | TSTD1 | 0.4421 | PLAGL2 | 0.3936 | TMEM126A | 0.3523 | ITSN2 | 0.3147 |
| IRF3 | 0.6010 | NUDT1 | 0.5020 | CTNNAL1 | 0.4421 | ECH1 | 0.3936 | NHP2 | 0.3523 | TLR8 | 0.3147 |
| UBC | 0.6009 | ZNF790 | 0.5020 | ADAMTS1 | 0.4421 | UNC50 | 0.3935 | HDHD1 | 0.3522 | TPX2 | 0.3146 |
| CNIH4 | 0.6008 | NFKBIA | 0.5020 | C8orf76 | 0.4420 | Z82188.1 | 0.3935 | RP11-305K5.1 | 0.3522 | GOLGA2B | 0.3146 |
| FABP5 | 0.6006 | EIF3G | 0.5020 | KPNA2 | 0.4420 | TMEM50B | 0.3934 | SLC35F5 | 0.3522 | FAM110A | 0.3146 |
| CCM2 | 0.6005 | C3AR1 | 0.5020 | ACSF2 | 0.4419 | IFI27 | 0.3934 | TRAPPC4 | 0.3522 | CCDC69 | 0.3145 |
| IMPA2 | 0.6004 | SNHG11 | 0.5019 | RP11-2C24.6 | 0.4419 | EPHX3 | 0.3933 | C11orf84 | 0.3522 | TECRP1 | 0.3145 |
| ITGB2 | 0.6001 | OXA1L | 0.5019 | IRAK2 | 0.4418 | MANBAL | 0.3933 | FUS | 0.3521 | LUC7L | 0.3145 |
| SH2D2A | 0.5998 | FZD5 | 0.5018 | CLDN23 | 0.4418 | LINC00601 | 0.3933 | SLC5A6 | 0.3521 | AC007969.5 | 0.3144 |
| MAN1C1 | 0.5996 | TRIM28 | 0.5017 | CERS5 | 0.4418 | SURF1 | 0.3932 | RNF215 | 0.3521 | RP11-872D17.8 | 0.3143 |
| CCDC137 | 0.5996 | SLC35A4 | 0.5017 | WDR45 | 0.4418 | IL2RB | 0.3931 | MED31 | 0.3521 | NDUFB6 | 0.3143 |
| OSTC | 0.5996 | MAP4K1 | 0.5017 | XRCC1 | 0.4417 | NT5E | 0.3931 | TK2 | 0.3520 | LYRM4 | 0.3142 |
| RBPMS | 0.5995 | GSAP | 0.5016 | SAP30BP | 0.4417 | HAUS1 | 0.3931 | NPRL2 | 0.3520 | C12orf57 | 0.3142 |
| TMBIM1 | 0.5995 | SYNPO | 0.5016 | SLC26A2 | 0.4417 | PLXDC1 | 0.3931 | RPL41P1 | 0.3520 | RP11-108P20.1 | 0.3142 |
| NUAK2 | 0.5993 | KRBA1 | 0.5015 | RBM22 | 0.4416 | SLC9A3R2 | 0.3931 | SDHB | 0.3519 | STOML1 | 0.3141 |
| BLVRB | 0.5991 | ARL6IP4 | 0.5015 | HAUS7 | 0.4416 | AC017116.11 | 0.3930 | CYB5R3 | 0.3519 | ZSCAN9 | 0.3141 |
| SLAMF8 | 0.5989 | RP5-1125A11.1 | 0.5013 | PKIG | 0.4416 | PIM2 | 0.3930 | CTD-2619J13.14 | 0.3519 | COPS5 | 0.3140 |
| PROCR | 0.5988 | MFAP2 | 0.5013 | METTL13 | 0.4415 | EARS2 | 0.3928 | TBC1D2 | 0.3519 | SLC35G2 | 0.3140 |
| PDIA6 | 0.5986 | CASP3 | 0.5012 | RP11-84C10.2 | 0.4415 | ATP6V1G1 | 0.3928 | ACTR5 | 0.3518 | LEMD1 | 0.3140 |
| B3GALT6 | 0.5984 | ANTXR2 | 0.5011 | RP11-163E9.2 | 0.4415 | RPL18A | 0.3927 | ISG20L2 | 0.3518 | TTC25 | 0.3140 |
| PRDX6 | 0.5983 | PHF11 | 0.5010 | MAOB | 0.4414 | BTF3 | 0.3927 | PARP16 | 0.3518 | C19orf25 | 0.3139 |
| EIF6 | 0.5983 | WDR83OS | 0.5010 | TTC1 | 0.4414 | RP11-347C12.3 | 0.3927 | DUSP22 | 0.3517 | CD302 | 0.3139 |
| C8orf4 | 0.5982 | CCDC86 | 0.5008 | FOLR1 | 0.4413 | ZNF800 | 0.3927 | RP11-1277A3.1 | 0.3517 | CTLA4 | 0.3138 |
| STC1 | 0.5982 | RNF166 | 0.5006 | RAB1A | 0.4413 | APITD1 | 0.3927 | NOD2 | 0.3517 | YTHDF3-AS1 | 0.3138 |
| IRF7 | 0.5981 | GADD45GIP1 | 0.5006 | SNRPG | 0.4413 | LTBP1 | 0.3926 | RP11-465B22.3 | 0.3517 | TUBGCP2 | 0.3137 |
| MMP9 | 0.5979 | NPLOC4 | 0.5006 | SARNP | 0.4412 | CAPN5 | 0.3926 | SH3BGR | 0.3517 | MLF2 | 0.3137 |
| IL13RA1 | 0.5979 | ISYNA1 | 0.5004 | ZNRD1 | 0.4412 | EMP2 | 0.3925 | PCIF1 | 0.3517 | PTOV1 | 0.3137 |
| TNFAIP8 | 0.5978 | COPG1 | 0.5004 | ANKRD52 | 0.4411 | PYURF | 0.3925 | XXbac-BPG181B23.7 | 0.3517 | MAP4 | 0.3136 |
| SPON2 | 0.5977 | CTBS | 0.5003 | IFI27L2 | 0.4409 | CCDC71L | 0.3924 | AES | 0.3517 | HOXD9 | 0.3136 |
| GPR3 | 0.5975 | DCAF15 | 0.5003 | MOXD1 | 0.4409 | FAM193B | 0.3924 | RP11-173M1.8 | 0.3516 | TFR2 | 0.3136 |
| WBSCR16 | 0.5971 | GPRC5A | 0.5002 | TIMP2 | 0.4409 | FPR2 | 0.3924 | ERF | 0.3516 | DEXI | 0.3136 |
| NOD1 | 0.5970 | YIF1A | 0.5000 | CIITA | 0.4408 | AC011294.3 | 0.3924 | ELN | 0.3516 | FZD4 | 0.3135 |
| CEP89 | 0.5970 | LHFPL2 | 0.5000 | GEM | 0.4408 | HLA-C | 0.3923 | UBE2Q1 | 0.3516 | CSF2RA | 0.3135 |
| GLRX | 0.5969 | IER5 | 0.5000 | HSPA1B | 0.4408 | LAGE3 | 0.3922 | AKAP2 | 0.3516 | F8A1 | 0.3135 |
| WARS | 0.5968 | CTD-2006C1.2 | 0.4999 | CCDC97 | 0.4407 | RP11-428J1.5 | 0.3922 | EXOC4 | 0.3515 | POU2F2 | 0.3135 |
| PTPN2 | 0.5968 | DDX39A | 0.4998 | TOP1MT | 0.4407 | FOXC1 | 0.3922 | FIS1 | 0.3515 | ODC1 | 0.3134 |
| DUSP23 | 0.5968 | DES | 0.4997 | PLA2G16 | 0.4405 | CCDC74A | 0.3922 | GCLM | 0.3515 | ARNTL | 0.3134 |
| PQLC2 | 0.5967 | LENG9 | 0.4997 | MRPL13 | 0.4405 | MAEA | 0.3922 | MRPL41 | 0.3515 | PMS2CL | 0.3134 |
| SERF2 | 0.5966 | GNB2L1 | 0.4997 | VPS18 | 0.4404 | NDUFA6 | 0.3921 | RFX8 | 0.3515 | PCID2 | 0.3134 |
| TEN1 | 0.5965 | MIPEP | 0.4997 | RPS19BP1 | 0.4404 | GDPD3 | 0.3921 | SULT1A3 | 0.3515 | IPO11 | 0.3133 |
| MMP11 | 0.5963 | GRWD1 | 0.4996 | OS9 | 0.4403 | DDX19A | 0.3921 | CTD-2620I22.7 | 0.3515 | C5orf28 | 0.3133 |
| WBSCR22 | 0.5963 | BOLA3 | 0.4994 | VPS9D1 | 0.4403 | RP11-932O9.9 | 0.3920 | FAHD1 | 0.3514 | TTC26 | 0.3133 |
| ABHD14B | 0.5962 | TOR1A | 0.4992 | PNPLA4 | 0.4402 | COL4A1 | 0.3920 | TRPC4AP | 0.3514 | RRP15 | 0.3131 |
| APEX2 | 0.5960 | STARD3 | 0.4992 | TRIOBP | 0.4402 | CCDC58 | 0.3919 | TMEM99 | 0.3514 | ZNF284 | 0.3131 |
| CNN2 | 0.5959 | TSPAN10 | 0.4992 | RP11-54A9.1 | 0.4402 | MAF1 | 0.3919 | RP11-387M24.5 | 0.3514 | RWDD3 | 0.3131 |
| TNFRSF1B | 0.5955 | STAT6 | 0.4991 | RP11-693N9.2 | 0.4401 | ATRIP | 0.3919 | NBPF10 | 0.3513 | DNAJC15 | 0.3131 |
| SLC1A5 | 0.5954 | CCDC61 | 0.4990 | DCUN1D3 | 0.4401 | CTC-479C5.12 | 0.3918 | POU2F3 | 0.3513 | TP53I11 | 0.3130 |
| FAM86C1 | 0.5954 | ABRACL | 0.4990 | GNG11 | 0.4401 | AC046143.3 | 0.3918 | CCNDBP1 | 0.3513 | CALML4 | 0.3130 |
| CHRDL2 | 0.5952 | TMEM222 | 0.4990 | CNPPD1 | 0.4401 | IDUA | 0.3918 | GS1-124K5.11 | 0.3513 | RP11-326C3.11 | 0.3130 |
| VAT1 | 0.5951 | PLD3 | 0.4988 | KBTBD2 | 0.4401 | ATG3 | 0.3917 | C1orf35 | 0.3513 | CCDC18 | 0.3129 |
| HCST | 0.5951 | DYNLT3 | 0.4988 | HSPA1A | 0.4400 | TKT | 0.3916 | RP4-635E18.6 | 0.3513 | RP11-195F19.9 | 0.3128 |
| ACP2 | 0.5949 | MED15 | 0.4987 | SH2B2 | 0.4400 | MRPL15 | 0.3916 | FASTKD2 | 0.3513 | USP39 | 0.3127 |
| STT3A | 0.5947 | ASB6 | 0.4987 | RP11-344B5.2 | 0.4400 | AIRE | 0.3916 | FNTB | 0.3512 | JUND | 0.3127 |
| SLC39A4 | 0.5946 | UBA52 | 0.4987 | CTD-2267D19.2 | 0.4400 | CHCHD4 | 0.3915 | ATP5F1 | 0.3512 | RP11-443B7.1 | 0.3126 |
| MAPK13 | 0.5946 | TWISTNB | 0.4987 | MED16 | 0.4400 | AC074117.10 | 0.3914 | CTB-60E11.4 | 0.3512 | LA16c-349E10.1 | 0.3126 |
| CA12 | 0.5945 | CYTH2 | 0.4987 | NMRK1 | 0.4399 | NID2 | 0.3914 | ITK | 0.3511 | XCL2 | 0.3126 |
| PLB1 | 0.5944 | AHNAK2 | 0.4984 | LIMK2 | 0.4399 | LSMEM1 | 0.3913 | SEPT7P2 | 0.3511 | BTN3A3 | 0.3125 |
| TMEM234 | 0.5943 | MED10 | 0.4984 | PSMD1 | 0.4398 | VNN2 | 0.3912 | SMARCE1 | 0.3511 | CES2 | 0.3125 |
| IER2 | 0.5942 | PRSS36 | 0.4984 | SRSF9 | 0.4398 | ZNF613 | 0.3912 | AC010894.3 | 0.3511 | ADAT2 | 0.3125 |
| SEMA3F | 0.5941 | AC093818.1 | 0.4982 | CDC42EP1 | 0.4397 | LBP | 0.3912 | SLC35B4 | 0.3511 | ZNF419 | 0.3125 |
| DHRS3 | 0.5940 | FBXO4 | 0.4982 | FCGR1B | 0.4397 | RASSF3 | 0.3912 | RPL37 | 0.3510 | JKAMP | 0.3125 |
| CHMP2A | 0.5939 | YDJC | 0.4981 | SLC43A2 | 0.4397 | EIF3CL | 0.3911 | NUDT16P | 0.3510 | ANKK1 | 0.3125 |
| PNKP | 0.5938 | CCRL2 | 0.4981 | UAP1L1 | 0.4396 | RP11-1191J2.2 | 0.3911 | TMEM209 | 0.3510 | TRAIP | 0.3125 |
| ZMYM6NB | 0.5935 | TNFSF13B | 0.4981 | MYO1B | 0.4396 | RP1-86C11.7 | 0.3911 | NRN1 | 0.3509 | CMC2 | 0.3123 |
| CTD-3138B18.5 | 0.5929 | COPE | 0.4980 | DHRS1 | 0.4395 | SF3B3 | 0.3911 | HYAL3 | 0.3509 | RP11-24B19.3 | 0.3123 |
| SRA1 | 0.5929 | RPL36AL | 0.4978 | EIF2B2 | 0.4395 | NEAT1 | 0.3911 | SSC5D | 0.3508 | ACSS2 | 0.3123 |
| TLR2 | 0.5928 | EIF2S2 | 0.4977 | DCUN1D5 | 0.4395 | ZNFX1 | 0.3911 | GCA | 0.3507 | ENDOD1 | 0.3123 |
| SLC4A2 | 0.5928 | F3 | 0.4976 | DHX8 | 0.4394 | EPS15L1 | 0.3910 | IL18R1 | 0.3507 | CXorf21 | 0.3123 |
| RAB42 | 0.5926 | ZNF628 | 0.4976 | ENPEP | 0.4394 | MAX | 0.3910 | F12 | 0.3507 | SGMS2 | 0.3122 |
| LUM | 0.5925 | UBL4A | 0.4976 | LENG8 | 0.4392 | ZFAND2B | 0.3910 | TULP3 | 0.3507 | SLC25A35 | 0.3122 |
| BRAT1 | 0.5923 | STK19 | 0.4975 | RP3-477O4.14 | 0.4391 | RP1-178F15.5 | 0.3909 | MALT1 | 0.3506 | TMEM256 | 0.3121 |
| RNF149 | 0.5921 | UXT | 0.4975 | AL627309.1 | 0.4390 | CPPED1 | 0.3909 | SOWAHD | 0.3506 | DEF8 | 0.3120 |
| CTC-1337H24.1 | 0.5921 | IL10RB-AS1 | 0.4974 | SH2B3 | 0.4390 | RP11-203J24.9 | 0.3909 | NSMCE2 | 0.3505 | POMT2 | 0.3120 |
| WTAP | 0.5920 | AC145676.2 | 0.4972 | RNF40 | 0.4389 | TACSTD2 | 0.3908 | VTI1B | 0.3505 | CENPN | 0.3120 |
| SMPD1 | 0.5919 | TRMT112 | 0.4972 | PYGO2 | 0.4388 | GATAD1 | 0.3908 | MEOX2 | 0.3505 | RWDD1 | 0.3120 |
| FCGR3A | 0.5919 | CCDC130 | 0.4972 | DCTPP1 | 0.4386 | C7orf31 | 0.3905 | CTD-3064M3.3 | 0.3504 | RP11-293M10.5 | 0.3120 |
| TMCO4 | 0.5919 | COL3A1 | 0.4972 | BLOC1S1 | 0.4386 | FAM3C | 0.3905 | STK11IP | 0.3504 | SCFD1 | 0.3119 |
| DERL2 | 0.5916 | AC091729.9 | 0.4972 | GPR137 | 0.4385 | NUDT8 | 0.3905 | PSMD12 | 0.3504 | RPS12 | 0.3119 |
| FAM214B | 0.5916 | PIGB | 0.4971 | RP11-10C24.3 | 0.4385 | ILVBL | 0.3905 | VSIG10L | 0.3503 | RGN | 0.3119 |
| SOCS3 | 0.5914 | OR51E1 | 0.4971 | LCP2 | 0.4385 | RP11-10C24.2 | 0.3905 | AC005306.3 | 0.3503 | AKNA | 0.3119 |
| DTX3L | 0.5912 | ZCCHC6 | 0.4970 | SPRY4 | 0.4384 | PSMF1 | 0.3904 | RP11-390P2.4 | 0.3503 | TMEM80 | 0.3118 |
| CYR61 | 0.5912 | PAF1 | 0.4970 | METTL1 | 0.4384 | BZW2 | 0.3904 | SH2D3A | 0.3503 | FAM212A | 0.3117 |
| NXT1 | 0.5910 | TNFAIP3 | 0.4970 | MAD1L1 | 0.4384 | WDR4 | 0.3904 | RP11-798M19.6 | 0.3502 | GTF3C2 | 0.3117 |
| TMEM102 | 0.5909 | SLC35B1 | 0.4969 | FABP5P7 | 0.4384 | FAM27B | 0.3904 | CHAF1B | 0.3501 | LMBR1L | 0.3116 |
| C9orf89 | 0.5908 | ANGPT2 | 0.4969 | ARHGAP25 | 0.4384 | LASP1 | 0.3903 | BECN1 | 0.3501 | FAM221A | 0.3116 |
| CTD-2231E14.8 | 0.5907 | FKBP2 | 0.4969 | SPATA1 | 0.4383 | ALG6 | 0.3903 | AC093627.9 | 0.3500 | RP4-758J18.13 | 0.3116 |
| ETV7 | 0.5906 | EIF3K | 0.4969 | PRAF2 | 0.4383 | SOCS2-AS1 | 0.3903 | RPL36A | 0.3500 | MLF1IP | 0.3115 |
| KIAA0020 | 0.5906 | MRPL14 | 0.4969 | AC098614.2 | 0.4382 | EOGT | 0.3903 | SIGLEC1 | 0.3500 | UBAC1 | 0.3115 |
| EFNA4 | 0.5905 | LYAR | 0.4969 | RBM34 | 0.4382 | NPL | 0.3903 | ERP27 | 0.3500 | DUSP10 | 0.3115 |
| SDC1 | 0.5904 | PSMC1 | 0.4966 | UBE2D3 | 0.4382 | MTHFD1 | 0.3902 | RP11-363E7.4 | 0.3499 | CDH4 | 0.3115 |
| CALU | 0.5901 | BST1 | 0.4965 | C16orf91 | 0.4381 | SLC9A8 | 0.3902 | CCT4 | 0.3499 | LRRC29 | 0.3115 |
| CD33 | 0.5901 | HAAO | 0.4965 | ZNF836 | 0.4381 | RNASE1 | 0.3902 | RPUSD3 | 0.3499 | XRCC4 | 0.3115 |
| B4GALT7 | 0.5897 | MPG | 0.4965 | ADA | 0.4380 | RPA3-AS1 | 0.3902 | MCM3 | 0.3498 | RPL31 | 0.3115 |
| LAMA5 | 0.5896 | RP6-99M1.2 | 0.4964 | DMPK | 0.4380 | THOC7 | 0.3902 | ABHD5 | 0.3498 | SMAD6 | 0.3114 |
| ARPC1A | 0.5895 | C1QTNF9B-AS1 | 0.4964 | ACTR8 | 0.4380 | TMCO3 | 0.3901 | TMEM129 | 0.3497 | ZNF133 | 0.3114 |
| CKLF | 0.5894 | GJB2 | 0.4964 | UBA1 | 0.4379 | BAIAP2 | 0.3900 | B3GNT2 | 0.3497 | HOXA5 | 0.3113 |
| RP11-879F14.2 | 0.5894 | COL6A3 | 0.4962 | ANO6 | 0.4379 | SMPD4 | 0.3900 | AC108448.2 | 0.3497 | PARS2 | 0.3113 |
| RP11-783K16.5 | 0.5894 | SLC2A5 | 0.4961 | AIMP2 | 0.4379 | COMT | 0.3899 | UGP2 | 0.3496 | MRPS25 | 0.3113 |
| PHLDA3 | 0.5893 | TMEM54 | 0.4961 | SLC27A1 | 0.4378 | TCOF1 | 0.3899 | NPIPA7 | 0.3496 | SIN3B | 0.3112 |
| ELL | 0.5892 | TTYH3 | 0.4960 | RP11-259K5.2 | 0.4378 | MORN1 | 0.3899 | TMEM41B | 0.3496 | CENPT | 0.3112 |
| RAB27A | 0.5892 | SPSB1 | 0.4959 | FAM26E | 0.4378 | MYL4 | 0.3899 | RPL32 | 0.3496 | IPPK | 0.3111 |
| DNAJB11 | 0.5891 | IKBKB | 0.4959 | ANAPC11 | 0.4377 | INSRR | 0.3898 | C8orf59 | 0.3496 | CMTR2 | 0.3111 |
| SOD2 | 0.5891 | RBM47 | 0.4959 | MPP1 | 0.4377 | ANO9 | 0.3897 | TPGS1 | 0.3495 | DVL3 | 0.3111 |
| C1QA | 0.5891 | NR1H3 | 0.4958 | PLEKHN1 | 0.4376 | SRRM2 | 0.3896 | C7orf10 | 0.3495 | ATP11C | 0.3111 |
| PRR13 | 0.5890 | STX10 | 0.4958 | MRPL53 | 0.4376 | PSMB7 | 0.3896 | DDTL | 0.3494 | RP11-153M7.3 | 0.3111 |
| SLC39A1 | 0.5889 | SAMHD1 | 0.4957 | GALNT5 | 0.4376 | HPGDS | 0.3896 | POLR3K | 0.3494 | EFCAB11 | 0.3110 |
| HAMP | 0.5886 | LYPD1 | 0.4956 | DHRS7B | 0.4374 | AC002456.2 | 0.3896 | GPATCH1 | 0.3494 | ZDHHC9 | 0.3110 |
| PRF1 | 0.5886 | NBEAL2 | 0.4955 | GALNT10 | 0.4374 | TNFSF10 | 0.3895 | CYB561 | 0.3493 | KRCC1 | 0.3110 |
| SLC7A7 | 0.5886 | FBLN1 | 0.4955 | AC092143.1 | 0.4374 | CLDN4 | 0.3894 | ZC3H18 | 0.3492 | LINC00638 | 0.3110 |
| LBX2-AS1 | 0.5884 | SCNM1 | 0.4955 | PRPS2 | 0.4374 | ZNF101 | 0.3893 | TC2N | 0.3492 | KAT5 | 0.3109 |
| AC078883.3 | 0.5883 | DAB2 | 0.4954 | KCNMB1 | 0.4374 | FBXO22 | 0.3893 | SDHAP1 | 0.3492 | PDSS2 | 0.3109 |
| GLB1 | 0.5883 | SF3B5 | 0.4952 | CCT8 | 0.4374 | SLBP | 0.3893 | AC096579.7 | 0.3492 | C12orf73 | 0.3109 |
| CIDEB | 0.5883 | NGLY1 | 0.4952 | SNRPA1 | 0.4373 | BRIX1 | 0.3893 | STAT1 | 0.3492 | C1orf170 | 0.3109 |
| ARPC2 | 0.5881 | FASTK | 0.4951 | AMICA1 | 0.4373 | RP11-556E13.1 | 0.3892 | C21orf2 | 0.3491 | ANKHD1-EIF4EBP3 | 0.3108 |
| CNPY4 | 0.5881 | TMEM2 | 0.4950 | PIGO | 0.4373 | AC004988.1 | 0.3892 | RP11-809O17.1 | 0.3490 | RP11-259N19.1 | 0.3107 |
| LRP1 | 0.5879 | RPL22L1 | 0.4950 | RP11-479G22.8 | 0.4373 | KCNK15 | 0.3892 | FEN1 | 0.3490 | C12orf75 | 0.3106 |
| GARS | 0.5878 | CXorf40A | 0.4950 | BTN2A1 | 0.4372 | NDUFAF2 | 0.3891 | A1BG-AS1 | 0.3490 | ACTR10 | 0.3106 |
| LYPLA2 | 0.5878 | WBP5 | 0.4950 | BIN2 | 0.4372 | NMNAT3 | 0.3891 | IL27 | 0.3490 | SIPA1L2 | 0.3106 |
| ZNF593 | 0.5877 | RP11-434H6.6 | 0.4948 | CETN2 | 0.4372 | GCNT1 | 0.3890 | PA2G4 | 0.3490 | CCDC157 | 0.3106 |
| CTD-2127H9.1 | 0.5877 | LIPE-AS1 | 0.4947 | RP11-71N10.1 | 0.4372 | SMOC2 | 0.3890 | APOO | 0.3490 | AKT2 | 0.3105 |
| FAM78B | 0.5871 | CTA-384D8.34 | 0.4947 | GPR39 | 0.4372 | C9orf114 | 0.3890 | WDR12 | 0.3489 | RP11-618K13.2 | 0.3105 |
| CDC42EP5 | 0.5871 | RALA | 0.4947 | KLHDC7B | 0.4372 | POLR2G | 0.3890 | CHTOP | 0.3489 | AGBL5 | 0.3105 |
| RARRES2 | 0.5871 | HERPUD1 | 0.4946 | S100A2 | 0.4371 | HDAC10 | 0.3889 | ZBTB21 | 0.3489 | SLC16A11 | 0.3105 |
| MKNK2 | 0.5870 | GLTPD1 | 0.4945 | ELAVL1 | 0.4371 | ABCC10 | 0.3889 | PURB | 0.3489 | LCMT1 | 0.3104 |
| BRMS1 | 0.5869 | NAALADL1 | 0.4945 | SPAG7 | 0.4370 | DMAP1 | 0.3888 | EIF4H | 0.3489 | GNB1L | 0.3104 |
| TMEM60 | 0.5868 | IL6 | 0.4945 | TIMM17A | 0.4370 | RBBP7 | 0.3888 | PSMG4 | 0.3489 | CTD-3093M3.1 | 0.3104 |
| PPP1R3B | 0.5868 | B4GALT3 | 0.4944 | DOK5 | 0.4370 | LA16c-390E6.5 | 0.3888 | ADSL | 0.3488 | DRD4 | 0.3104 |
| SUMF2 | 0.5863 | PI4K2B | 0.4943 | NFKB1 | 0.4369 | ATG9B | 0.3888 | NDUFC2 | 0.3487 | MCM6 | 0.3104 |
| TRPV4 | 0.5862 | NXF1 | 0.4943 | SNRPC | 0.4369 | RSBN1L-AS1 | 0.3888 | RPS3 | 0.3485 | HGSNAT | 0.3103 |
| RP11-498C9.2 | 0.5862 | CTD-3131K8.2 | 0.4943 | CTB-63M22.1 | 0.4369 | CNTROB | 0.3887 | ECHS1 | 0.3485 | SPRED1 | 0.3103 |
| RDH10 | 0.5859 | IL1R2 | 0.4938 | DIAPH1 | 0.4369 | RP4-758J18.10 | 0.3887 | AF011889.2 | 0.3485 | RP11-322E11.5 | 0.3103 |
| FCGR2A | 0.5856 | C7orf73 | 0.4938 | DRAM2 | 0.4368 | CLK3 | 0.3885 | SLAMF1 | 0.3485 | HAUS4 | 0.3103 |
| EHBP1L1 | 0.5856 | DAD1 | 0.4938 | CCDC124 | 0.4367 | RPS7 | 0.3885 | HN1 | 0.3483 | PIH1D2 | 0.3102 |
| PMEPA1 | 0.5856 | DERL1 | 0.4937 | DFNA5 | 0.4367 | AC015936.3 | 0.3885 | CCL17 | 0.3483 | LY75 | 0.3102 |
| GAL3ST4 | 0.5852 | POMGNT1 | 0.4937 | CNN3 | 0.4367 | ABCD4 | 0.3884 | CDADC1 | 0.3482 | DFNB31 | 0.3102 |
| WIPI1 | 0.5852 | PCED1B | 0.4936 | PRRC1 | 0.4366 | ORMDL1 | 0.3884 | CUL4A | 0.3482 | PDCD10 | 0.3102 |
| ITGB5 | 0.5851 | ZCCHC9 | 0.4936 | STX3 | 0.4366 | THBS1 | 0.3883 | HEXDC | 0.3482 | MAGED4B | 0.3101 |
| PLA2G15 | 0.5851 | FSCN1 | 0.4933 | IRF2BP1 | 0.4365 | C17orf82 | 0.3883 | SREBF1 | 0.3481 | PKNOX1 | 0.3101 |
| COL1A2 | 0.5850 | FADS3 | 0.4932 | FAM210B | 0.4365 | ZBTB7B | 0.3883 | ALG12 | 0.3481 | RP11-229P13.25 | 0.3101 |
| FKBP9 | 0.5850 | DRAP1 | 0.4931 | CCNE1 | 0.4364 | ARHGEF19 | 0.3882 | TCF25 | 0.3480 | ARL9 | 0.3101 |
| RENBP | 0.5849 | ROMO1 | 0.4931 | RPS17 | 0.4364 | COX7B | 0.3882 | RP11-157P1.5 | 0.3480 | IGLL5 | 0.3101 |
| ADM | 0.5849 | AC017002.1 | 0.4930 | TUSC2 | 0.4363 | SNX5 | 0.3882 | NCL | 0.3480 | RAET1G | 0.3101 |
| TGIF1 | 0.5848 | PIH1D1 | 0.4930 | ZDHHC18 | 0.4362 | ZNF584 | 0.3882 | SUMO1 | 0.3479 | UCK1 | 0.3100 |
| EPS8L1 | 0.5848 | C16orf93 | 0.4929 | GRPEL2 | 0.4361 | NOL7 | 0.3881 | CD101 | 0.3479 | EID2 | 0.3099 |
| PLEKHO2 | 0.5847 | LAMP1 | 0.4928 | PDCD1 | 0.4360 | MRPL1 | 0.3881 | RAB11B-AS1 | 0.3479 | INMT | 0.3099 |
| ARHGAP18 | 0.5847 | FZD2 | 0.4928 | PLEKHM1 | 0.4360 | PHF14 | 0.3881 | GTF2IRD2B | 0.3478 | ESD | 0.3098 |
| PPP4C | 0.5846 | C7orf43 | 0.4927 | MINA | 0.4360 | RP11-248J18.2 | 0.3881 | METTL2B | 0.3478 | RNF187 | 0.3098 |
| POP4 | 0.5842 | PARP9 | 0.4927 | PSMA6 | 0.4360 | CRYBB1 | 0.3881 | TTC9C | 0.3478 | SRSF3 | 0.3098 |
| LILRB2 | 0.5842 | PTRH1 | 0.4925 | CDK16 | 0.4359 | VCP | 0.3880 | ABCB7 | 0.3477 | SLC22A23 | 0.3098 |
| MMAA | 0.5840 | NFE2L3 | 0.4923 | ARRDC1 | 0.4359 | MGC4294 | 0.3880 | STIM2 | 0.3477 | PPP5C | 0.3098 |
| VIMP | 0.5839 | TP53RK | 0.4923 | ARL1 | 0.4359 | FAM43A | 0.3879 | CEP55 | 0.3476 | NCBP2 | 0.3097 |
| MSN | 0.5839 | ZRSR2 | 0.4922 | TRAF7 | 0.4358 | SLAMF6 | 0.3876 | CNFN | 0.3476 | RPL9P8 | 0.3096 |
| CALHM2 | 0.5838 | HUS1 | 0.4922 | ACVRL1 | 0.4357 | TAF13 | 0.3876 | SLC6A8 | 0.3475 | RP11-568K15.1 | 0.3096 |
| JUNB | 0.5837 | LCTL | 0.4921 | RRP36 | 0.4357 | HINT2 | 0.3876 | IFNGR1 | 0.3475 | DDO | 0.3095 |
| RAC2 | 0.5836 | TBC1D22A | 0.4921 | RNF10 | 0.4357 | RP11-469M7.1 | 0.3875 | ODF3L1 | 0.3475 | APOE | 0.3095 |
| MRPS15 | 0.5836 | SH3GLB1 | 0.4921 | CYFIP1 | 0.4357 | RP11-213H15.1 | 0.3875 | SAFB | 0.3474 | CD80 | 0.3095 |
| GPR108 | 0.5832 | POFUT1 | 0.4921 | PINX1 | 0.4357 | MAK16 | 0.3874 | XPO6 | 0.3474 | HSD17B3 | 0.3095 |
| ZNF787 | 0.5832 | MRPL2 | 0.4921 | SHCBP1 | 0.4356 | PRPF6 | 0.3874 | ZMAT5 | 0.3473 | DUS2 | 0.3094 |
| SH3BP2 | 0.5828 | FAM136A | 0.4921 | HAUS8 | 0.4356 | AC009005.2 | 0.3874 | MTRF1L | 0.3473 | SMARCA4 | 0.3094 |
| PTGFRN | 0.5826 | ALKBH4 | 0.4919 | TMA7 | 0.4356 | TIPARP | 0.3874 | POMZP3 | 0.3473 | CSNK2B-LY6G5B-1181 | 0.3094 |
| PLSCR1 | 0.5825 | ARMC7 | 0.4919 | EGFLAM | 0.4355 | RP11-175K6.1 | 0.3873 | KLF5 | 0.3472 | TSC22D3 | 0.3092 |
| LSM10 | 0.5821 | NR2C2AP | 0.4919 | PRR14 | 0.4354 | HSD17B8 | 0.3873 | OACYLP | 0.3472 | PCBP2 | 0.3092 |
| IL15RA | 0.5821 | MRPL34 | 0.4919 | UTP11L | 0.4353 | TRIM27 | 0.3872 | C15orf52 | 0.3472 | GORASP2 | 0.3092 |
| EIF4A1 | 0.5820 | PDXK | 0.4917 | EMG1 | 0.4353 | NLRP3 | 0.3872 | CD36 | 0.3471 | LINC00941 | 0.3092 |
| SNX33 | 0.5820 | UTS2 | 0.4916 | ZNF335 | 0.4353 | KPTN | 0.3872 | ITFG2 | 0.3471 | CYP1B1 | 0.3091 |
| SMIM4 | 0.5820 | GNL1 | 0.4915 | CD300LB | 0.4352 | RPS6 | 0.3870 | HGF | 0.3470 | NIPSNAP3A | 0.3090 |
| MS4A6A | 0.5819 | SH3TC1 | 0.4915 | AC006011.4 | 0.4352 | CD55 | 0.3869 | RP5-1085F17.3 | 0.3469 | DBI | 0.3090 |
| BUD31 | 0.5818 | TCN2 | 0.4914 | TATDN2 | 0.4352 | RPL27 | 0.3869 | NAAA | 0.3468 | HTRA2 | 0.3090 |
| PREB | 0.5817 | CTNNBL1 | 0.4912 | RP11-295K3.1 | 0.4350 | DOCK2 | 0.3868 | RP11-768F21.1 | 0.3467 | HOXA4 | 0.3089 |
| TMEM41A | 0.5817 | SSU72 | 0.4911 | SNRNP40 | 0.4350 | OSTM1 | 0.3868 | RRAGA | 0.3467 | CSNK1G1 | 0.3089 |
| EIF4E2 | 0.5815 | NAA10 | 0.4910 | ISG15 | 0.4350 | HSPBP1 | 0.3867 | HHIPL2 | 0.3467 | SNRPGP10 | 0.3088 |
| NFKBIB | 0.5814 | GAB3 | 0.4910 | ZNF599 | 0.4349 | NKX3-1 | 0.3867 | MRM1 | 0.3466 | RP4-740C4.8 | 0.3088 |
| CYTIP | 0.5811 | COL4A2 | 0.4910 | FCGR2C | 0.4349 | CWC25 | 0.3866 | ATP5L | 0.3466 | CNOT10 | 0.3088 |
| SLC35D2 | 0.5811 | SPSB2 | 0.4909 | TMEM200B | 0.4349 | TIMM9 | 0.3866 | GINM1 | 0.3465 | GOLPH3L | 0.3087 |
| ENO1 | 0.5811 | CYP27A1 | 0.4909 | RNASE3 | 0.4348 | UQCRC1 | 0.3865 | CAMK2N1 | 0.3465 | TMEM86A | 0.3087 |
| FAM115C | 0.5810 | DUS1L | 0.4908 | ZNF503 | 0.4348 | NME1 | 0.3864 | LTC4S | 0.3465 | MT3 | 0.3087 |
| ARHGAP4 | 0.5810 | KCTD11 | 0.4907 | SYF2 | 0.4348 | NDOR1 | 0.3864 | OR2A1-AS1 | 0.3465 | DBR1 | 0.3087 |
| FAM114A1 | 0.5810 | IL1RN | 0.4907 | SMIM7 | 0.4347 | CTSO | 0.3864 | AC064875.2 | 0.3464 | MAGED1 | 0.3087 |
| HMHA1 | 0.5810 | HMGA1 | 0.4906 | TNFAIP8L3 | 0.4347 | AC003075.4 | 0.3863 | ITGAE | 0.3464 | RPL30 | 0.3086 |
| ARPC5 | 0.5810 | MAP3K11 | 0.4905 | AKT1 | 0.4346 | MCM3AP | 0.3863 | RBM15B | 0.3464 | RP11-810M2.2 | 0.3086 |
| HBEGF | 0.5809 | STK11 | 0.4905 | TEP1 | 0.4346 | VCAM1 | 0.3863 | COL16A1 | 0.3464 | BAK1P1 | 0.3086 |
| FNDC4 | 0.5809 | COMMD4 | 0.4904 | RP11-327F22.2 | 0.4345 | IGHG4 | 0.3863 | SCLY | 0.3464 | ZSCAN16-AS1 | 0.3086 |
| FAM129B | 0.5808 | ATG4A | 0.4904 | HLA-DPB1 | 0.4345 | NCBP2-AS2 | 0.3862 | PCTP | 0.3464 | STAG3L4 | 0.3086 |
| TMEM205 | 0.5807 | NES | 0.4904 | SUGT1 | 0.4344 | MBOAT1 | 0.3861 | ASMTL | 0.3463 | ELMOD2 | 0.3085 |
| FOSL2 | 0.5807 | NCF2 | 0.4903 | RP11-139H15.1 | 0.4344 | SERTAD2 | 0.3861 | FAM117A | 0.3463 | PALB2 | 0.3084 |
| PFKFB4 | 0.5806 | TWIST1 | 0.4902 | RP11-395G23.3 | 0.4344 | AP003419.11 | 0.3861 | CTD-2369P2.12 | 0.3462 | OR2A9P | 0.3083 |
| SEPHS2 | 0.5805 | MEF2BNB | 0.4901 | RP11-452C13.1 | 0.4343 | INTS12 | 0.3861 | RP1-20B21.4 | 0.3462 | TSPAN33 | 0.3082 |
| POSTN | 0.5804 | RPLP0 | 0.4901 | TMEM18 | 0.4342 | TNFSF14 | 0.3860 | PSTPIP1 | 0.3462 | SAC3D1 | 0.3082 |
| GADD45B | 0.5802 | ARF1 | 0.4900 | MRGPRF | 0.4342 | MRPL18 | 0.3858 | TTI2 | 0.3462 | KLF17 | 0.3081 |
| LMF2 | 0.5801 | GS1-114I9.1 | 0.4900 | PICK1 | 0.4341 | C19orf59 | 0.3857 | RAP2C | 0.3461 | PIAS3 | 0.3081 |
| RBM42 | 0.5801 | RNF145 | 0.4900 | HLA-DRB1 | 0.4341 | NIT1 | 0.3857 | CCL27 | 0.3461 | RP11-488C13.7 | 0.3081 |
| KDELR3 | 0.5800 | ATF4 | 0.4899 | CTD-3092A11.2 | 0.4339 | ID3 | 0.3857 | RP5-997D16.2 | 0.3461 | CTD-3195I5.1 | 0.3081 |
| LGMN | 0.5797 | PLOD2 | 0.4899 | DHRS4 | 0.4339 | CDK10 | 0.3857 | CCBL2 | 0.3461 | KCNK13 | 0.3081 |
| ELK3 | 0.5795 | CHMP1A | 0.4899 | NXPH4 | 0.4339 | RP11-558F24.4 | 0.3856 | HOXB5 | 0.3460 | WNK4 | 0.3080 |
| TICAM1 | 0.5794 | RP3-340N1.2 | 0.4899 | OPN3 | 0.4339 | DPY30 | 0.3856 | NHLRC3 | 0.3460 | CTD-2540F13.2 | 0.3079 |
| TXNDC17 | 0.5793 | RP1-93H18.7 | 0.4898 | RHOJ | 0.4339 | LRG1 | 0.3856 | FAM89B | 0.3460 | LYPLA1 | 0.3078 |
| MYOF | 0.5791 | TNFSF13 | 0.4897 | CBX3 | 0.4338 | SIT1 | 0.3856 | SLC4A1AP | 0.3460 | MCUR1 | 0.3078 |
| MRPL32 | 0.5791 | NRD1 | 0.4897 | GGH | 0.4338 | BNIP3L | 0.3856 | PITPNM1 | 0.3459 | H3F3A | 0.3078 |
| B9D2 | 0.5789 | ZC3HAV1 | 0.4897 | AC144831.1 | 0.4338 | PMS2P1 | 0.3856 | ENO3 | 0.3459 | FBXO25 | 0.3078 |
| PRPF31 | 0.5784 | MDFIC | 0.4897 | COL5A2 | 0.4337 | ADAMTS7 | 0.3856 | SLC51A | 0.3459 | PFDN1 | 0.3077 |
| PINLYP | 0.5784 | KMO | 0.4897 | FPR3 | 0.4337 | ZC3HC1 | 0.3855 | TNFSF15 | 0.3459 | RP11-282O18.6 | 0.3076 |
| ARPC3 | 0.5784 | TIMM22 | 0.4896 | DENND1A | 0.4337 | FAF2 | 0.3854 | SLC27A5 | 0.3459 | RAC1P2 | 0.3076 |
| GALK1 | 0.5783 | MUC12 | 0.4896 | CD2BP2 | 0.4335 | NLRX1 | 0.3854 | HPSE | 0.3458 | ALS2CL | 0.3075 |
| OPA3 | 0.5781 | UBE2M | 0.4895 | ZMPSTE24 | 0.4335 | COL15A1 | 0.3854 | ATG2A | 0.3458 | CHL1 | 0.3075 |
| LAMA4 | 0.5780 | STAP2 | 0.4894 | GS1-358P8.4 | 0.4334 | FAM206A | 0.3853 | RP5-899E9.1 | 0.3457 | SOD1 | 0.3075 |
| BLVRA | 0.5777 | USP36 | 0.4894 | SHROOM1 | 0.4334 | ELP5 | 0.3853 | MX1 | 0.3457 | HSPBAP1 | 0.3075 |
| ACP6 | 0.5775 | TMEM106A | 0.4894 | ASIP | 0.4334 | WDR18 | 0.3853 | BBC3 | 0.3457 | ZNF846 | 0.3074 |
| DDRGK1 | 0.5775 | ADAMTS9 | 0.4893 | GMPPB | 0.4334 | TIMM17B | 0.3852 | SSRP1 | 0.3456 | PGGT1B | 0.3074 |
| MFI2 | 0.5774 | PSMA4 | 0.4893 | NME3 | 0.4333 | MRTO4 | 0.3852 | RP11-867G23.4 | 0.3456 | RP11-418J17.1 | 0.3074 |
| TEX264 | 0.5774 | OAF | 0.4893 | ACSS3 | 0.4331 | LIG1 | 0.3852 | CDH2 | 0.3455 | LINC00968 | 0.3073 |
| CLPTM1L | 0.5773 | CYB561A3 | 0.4892 | TELO2 | 0.4331 | AAAS | 0.3851 | EEF1A1 | 0.3455 | CANX | 0.3073 |
| ZBTB8OS | 0.5773 | NFAM1 | 0.4892 | ZNF816-ZNF321P | 0.4330 | RPSAP9 | 0.3851 | TMEM81 | 0.3454 | FAR2 | 0.3073 |
| GET4 | 0.5773 | WDR81 | 0.4890 | LIMS1 | 0.4330 | NGFR | 0.3851 | PSMD4 | 0.3454 | TAZ | 0.3072 |
| TICAM2 | 0.5772 | PSMB4 | 0.4890 | PDGFRL | 0.4330 | CC2D1A | 0.3851 | WISP1 | 0.3454 | FAM86HP | 0.3072 |
| USP30-AS1 | 0.5772 | RIOK2 | 0.4889 | GCK | 0.4330 | AIDA | 0.3851 | FOS | 0.3454 | ANAPC2 | 0.3072 |
| RPN2 | 0.5771 | SRP19 | 0.4888 | DTNBP1 | 0.4330 | CLIC3 | 0.3851 | ESPN | 0.3453 | SLC25A5 | 0.3071 |
| SLC20A1 | 0.5770 | TMBIM6 | 0.4887 | EBP | 0.4330 | ZNF783 | 0.3850 | CAD | 0.3452 | UBTF | 0.3071 |
| HLA-DMA | 0.5769 | RHBDD2 | 0.4887 | PSD4 | 0.4329 | CTSW | 0.3850 | ATP5J | 0.3452 | ZSWIM4 | 0.3071 |
| ZNF581 | 0.5768 | MRPL22 | 0.4886 | PAQR7 | 0.4329 | COQ4 | 0.3850 | SLC25A14 | 0.3452 | RP11-397E7.4 | 0.3071 |
| CD72 | 0.5768 | PPP1R12C | 0.4886 | LHFP | 0.4329 | PCDH18 | 0.3850 | TMEM127 | 0.3452 | MED29 | 0.3071 |
| C1orf54 | 0.5767 | ATP5J2 | 0.4885 | RHBDF2 | 0.4329 | FAM110C | 0.3849 | AC079922.3 | 0.3452 | TJAP1 | 0.3070 |
| ORAI3 | 0.5766 | EFNB1 | 0.4885 | COX16 | 0.4328 | ZNF587B | 0.3849 | SNRNP35 | 0.3451 | AC133528.2 | 0.3070 |
| UBE2F | 0.5766 | RPL36 | 0.4885 | TSR3 | 0.4327 | FRZB | 0.3848 | RP5-1057J7.7 | 0.3451 | RP1-228P16.1 | 0.3070 |
| CLDN7 | 0.5765 | RP11-162A12.2 | 0.4885 | SERBP1 | 0.4327 | PHLDB2 | 0.3848 | DCSTAMP | 0.3451 | CCDC94 | 0.3070 |
| PARVG | 0.5765 | UBE2I | 0.4885 | POLR1C | 0.4327 | TXNL1 | 0.3848 | SLC34A2 | 0.3451 | ELMO3 | 0.3070 |
| KCNE4 | 0.5763 | RP11-363E6.3 | 0.4885 | SLC39A14 | 0.4326 | MAP3K12 | 0.3848 | SNX14 | 0.3450 | SULT1A1 | 0.3070 |
| SMARCAL1 | 0.5761 | SLC2A3 | 0.4884 | WIPF1 | 0.4326 | CCT7 | 0.3848 | COPS7B | 0.3450 | PRR12 | 0.3070 |
| FKBP1A | 0.5760 | MEI1 | 0.4884 | ARHGAP1 | 0.4326 | NAP1L4 | 0.3848 | TGOLN2 | 0.3450 | MRPL3 | 0.3070 |
| ARFRP1 | 0.5760 | GFER | 0.4883 | C11orf83 | 0.4326 | CYP4V2 | 0.3847 | ENTHD2 | 0.3448 | CIB2 | 0.3068 |
| C19orf66 | 0.5760 | TINF2 | 0.4882 | TM9SF4 | 0.4326 | SREK1IP1 | 0.3846 | SKAP1 | 0.3448 | ATAD3B | 0.3068 |
| CHST12 | 0.5756 | SMOX | 0.4882 | GNA12 | 0.4326 | ZFPM1 | 0.3846 | CDPF1 | 0.3448 | EEF1G | 0.3068 |
| EVA1C | 0.5756 | TALDO1 | 0.4881 | DDX49 | 0.4325 | NRSN2 | 0.3846 | PFDN2 | 0.3447 | CDK13 | 0.3068 |
| ZNF784 | 0.5754 | TSKU | 0.4880 | TXNL4A | 0.4325 | INHBB | 0.3846 | MTG1 | 0.3447 | TST | 0.3068 |
| BST2 | 0.5754 | DDX27 | 0.4880 | SPATA20 | 0.4324 | RAB31 | 0.3846 | NOL10 | 0.3447 | CCNL1 | 0.3067 |
| ZFP36 | 0.5753 | TNFRSF10D | 0.4880 | BTK | 0.4324 | NSDHL | 0.3846 | ATP5G1 | 0.3447 | AAMP | 0.3067 |
| JOSD2 | 0.5752 | RTP4 | 0.4880 | B3GNT8 | 0.4323 | SMCO2 | 0.3845 | RP11-497H16.6 | 0.3446 | COX6C | 0.3067 |
| FCGR1A | 0.5752 | ASGR2 | 0.4879 | LEF1-AS1 | 0.4322 | ARL16 | 0.3845 | TXNDC9 | 0.3446 | AGER | 0.3066 |
| PPP6R1 | 0.5752 | RBM8A | 0.4878 | SDC2 | 0.4322 | ORC5 | 0.3845 | LDLRAD2 | 0.3446 | NDEL1 | 0.3065 |
| ITPRIP | 0.5751 | SFXN3 | 0.4877 | TPM1 | 0.4322 | AC018766.5 | 0.3845 | ABHD17C | 0.3445 | CTB-113I20.2 | 0.3065 |
| SH3GL1 | 0.5749 | TNFRSF10C | 0.4876 | ENKD1 | 0.4322 | TXNL4B | 0.3844 | PI4KB | 0.3445 | RP11-225B17.2 | 0.3065 |
| KCNN4 | 0.5748 | SRM | 0.4876 | RP4-607J23.2 | 0.4322 | UBB | 0.3844 | GIGYF1 | 0.3445 | ZNF358 | 0.3065 |
| IL17RC | 0.5747 | JAGN1 | 0.4875 | NOP56 | 0.4322 | SAFB2 | 0.3844 | AP003068.18 | 0.3444 | LRRC15 | 0.3065 |
| SLC38A6 | 0.5747 | TP53TG1 | 0.4875 | LINC00493 | 0.4321 | TMA16 | 0.3844 | RP3-460G2.2 | 0.3444 | COX5A | 0.3065 |
| FAM109B | 0.5747 | CMTM6 | 0.4875 | FAM101B | 0.4321 | PGAP3 | 0.3844 | PRKCH | 0.3444 | SH3KBP1 | 0.3064 |
| ZDHHC1 | 0.5746 | MT1X | 0.4874 | NAT14 | 0.4318 | SLC2A9 | 0.3844 | TREX2 | 0.3443 | MAPK1IP1L | 0.3064 |
| FMNL1 | 0.5745 | ITGB1BP1 | 0.4874 | VEGFC | 0.4318 | ATP6V0C | 0.3843 | CYBB | 0.3443 | EEF2 | 0.3064 |
| SLC27A3 | 0.5745 | RP9P | 0.4873 | COPRS | 0.4317 | TCTEX1D2 | 0.3843 | RP11-328M4.2 | 0.3442 | PDGFD | 0.3064 |
| DEF6 | 0.5744 | IFITM1 | 0.4872 | ZNF282 | 0.4317 | C1orf53 | 0.3843 | KCTD10 | 0.3441 | UNC5B | 0.3064 |
| SAA1 | 0.5743 | ZNF267 | 0.4872 | GGACT | 0.4316 | SLC25A3 | 0.3842 | C1D | 0.3441 | DRAXIN | 0.3064 |
| MYL12B | 0.5743 | PTTG1 | 0.4871 | UCHL3 | 0.4315 | SNRPD1 | 0.3842 | ZNF766 | 0.3441 | RPP30 | 0.3064 |
| ZNF524 | 0.5742 | EMD | 0.4869 | DYRK4 | 0.4315 | GZMM | 0.3842 | C19orf52 | 0.3440 | ADIRF-AS1 | 0.3064 |
| ITPA | 0.5741 | ABHD16B | 0.4868 | RP11-5C23.2 | 0.4314 | MBD6 | 0.3842 | C9orf9 | 0.3440 | SUN1 | 0.3063 |
| SEC61G | 0.5740 | HLA-DRA | 0.4866 | MKI67IP | 0.4313 | DUS3L | 0.3841 | ALOX15B | 0.3440 | TMX2 | 0.3063 |
| LTBR | 0.5732 | MOGS | 0.4865 | TFG | 0.4313 | C12orf23 | 0.3840 | SETX | 0.3440 | HLA-DOB | 0.3063 |
| EIF3I | 0.5732 | EIF4EBP3 | 0.4864 | IFI27L1 | 0.4313 | CUX1 | 0.3839 | RBPMS-AS1 | 0.3439 | CDCA3 | 0.3062 |
| PMP22 | 0.5732 | PTGES3P1 | 0.4863 | CASP5 | 0.4312 | STK24 | 0.3838 | DECR1 | 0.3439 | TIMM8A | 0.3062 |
| CLEC11A | 0.5730 | PLCB3 | 0.4863 | SAP30 | 0.4312 | SLC47A2 | 0.3837 | RP11-598F7.5 | 0.3438 | RCC1 | 0.3062 |
| CYB561D2 | 0.5730 | TMEM11 | 0.4863 | ZNF205 | 0.4311 | SFN | 0.3837 | RDH13 | 0.3438 | RP11-155G14.6 | 0.3062 |
| TXNDC5 | 0.5728 | C1RL-AS1 | 0.4862 | TMEM106C | 0.4311 | PWP1 | 0.3836 | RP11-134L10.1 | 0.3438 | AKR1B15 | 0.3061 |
| THBD | 0.5727 | MRPL23 | 0.4862 | IMMP2L | 0.4311 | PLAC8 | 0.3836 | REXO1 | 0.3437 | SAP25 | 0.3061 |
| CCDC107 | 0.5726 | STK38 | 0.4862 | IGHA2 | 0.4311 | MZB1 | 0.3836 | IGFBP7-AS1 | 0.3437 | ANKMY1 | 0.3061 |
| UBALD2 | 0.5725 | CTSK | 0.4862 | METTL22 | 0.4311 | AP2A2 | 0.3835 | WRAP53 | 0.3437 | UQCRFS1 | 0.3060 |
| LPCAT3 | 0.5725 | CXorf40B | 0.4862 | CMC1 | 0.4311 | GTF2IRD1 | 0.3835 | RP11-274B21.3 | 0.3437 | RSPH9 | 0.3060 |
| PPCDC | 0.5724 | SIPA1L1 | 0.4861 | CAPN2 | 0.4311 | EGFL6 | 0.3835 | RP11-496I9.1 | 0.3436 | SNAPIN | 0.3060 |
| PTP4A3 | 0.5724 | PDK3 | 0.4860 | NAPRT1 | 0.4311 | CDR2L | 0.3833 | CLEC10A | 0.3436 | CHAF1A | 0.3060 |
| ADSSL1 | 0.5724 | GSTP1 | 0.4860 | MS4A14 | 0.4310 | RNF24 | 0.3833 | RP11-375N15.2 | 0.3436 | GZMK | 0.3059 |
| SP100 | 0.5723 | MYO7A | 0.4859 | SLC22A18AS | 0.4310 | SLA2 | 0.3833 | DDA1 | 0.3436 | NABP2 | 0.3059 |
| TNFRSF18 | 0.5723 | CDC42 | 0.4859 | C19orf43 | 0.4310 | COL8A2 | 0.3832 | SUGP1 | 0.3435 | CD82 | 0.3059 |
| NFKBIE | 0.5721 | TP73-AS1 | 0.4857 | IL10 | 0.4310 | SYTL2 | 0.3832 | RAB33B | 0.3434 | ACN9 | 0.3059 |
| SLC39A13 | 0.5720 | ARFIP2 | 0.4856 | SDCCAG3 | 0.4310 | RP11-426C22.5 | 0.3832 | CLPB | 0.3434 | TCF7 | 0.3059 |
| APOL1 | 0.5719 | DDX28 | 0.4855 | COL27A1 | 0.4309 | CSTF1 | 0.3831 | HOXA-AS2 | 0.3434 | H1FX | 0.3059 |
| EGLN2 | 0.5719 | MT1M | 0.4854 | YARS2 | 0.4309 | AC135048.13 | 0.3831 | POLR2D | 0.3433 | TTC39C | 0.3058 |
| TADA3 | 0.5717 | NOSIP | 0.4853 | RPL12 | 0.4309 | CD163L1 | 0.3831 | GRIK5 | 0.3433 | FOXD2-AS1 | 0.3058 |
| FAM26F | 0.5716 | HK2 | 0.4852 | UBAC2 | 0.4308 | HNRNPA3 | 0.3830 | DKFZP761J1410 | 0.3432 | PIGA | 0.3058 |
| APOC2 | 0.5713 | AC011899.9 | 0.4851 | POC1A | 0.4308 | XXyac-YRM2039.2 | 0.3829 | AP001055.6 | 0.3432 | ASPSCR1 | 0.3057 |
| MRGBP | 0.5711 | DOLK | 0.4851 | SUPT5H | 0.4307 | HOMEZ | 0.3828 | RPL18AP3 | 0.3432 | HSPD1 | 0.3057 |
| DERL3 | 0.5709 | CCDC88B | 0.4851 | NEURL3 | 0.4307 | TGFBR2 | 0.3827 | ATP6V0D1 | 0.3432 | ARFGEF1 | 0.3057 |
| FGR | 0.5704 | RTCA | 0.4849 | ARSJ | 0.4305 | VGLL4 | 0.3827 | HNRNPD | 0.3432 | POLR3F | 0.3056 |
| RARRES3 | 0.5703 | COL12A1 | 0.4849 | GDPD2 | 0.4305 | RP11-360L9.7 | 0.3827 | IL17B | 0.3431 | CACNA1H | 0.3056 |
| ALG1 | 0.5701 | SAMSN1 | 0.4848 | RPL13AP5 | 0.4305 | ARFGAP3 | 0.3827 | GCFC2 | 0.3431 | TFEB | 0.3056 |
| IPO4 | 0.5701 | TOM1 | 0.4847 | PGM2 | 0.4305 | LGALS12 | 0.3826 | FOXK1 | 0.3430 | MFI2-AS1 | 0.3055 |
| RP11-611L7.1 | 0.5700 | CXCL3 | 0.4847 | GTF3C6 | 0.4304 | CEACAM21 | 0.3825 | BTN2A2 | 0.3430 | TRAPPC12 | 0.3054 |
| P4HA1 | 0.5698 | NDUFS5 | 0.4847 | PGRMC2 | 0.4303 | GPR35 | 0.3825 | LYPLAL1 | 0.3430 | AFG3L1P | 0.3054 |
| HDLBP | 0.5696 | SDC4 | 0.4846 | DUSP1 | 0.4303 | GLTSCR2 | 0.3825 | GTPBP3 | 0.3429 | BTBD11 | 0.3054 |
| TRIP4 | 0.5696 | DCTD | 0.4846 | NCKAP1L | 0.4303 | CD247 | 0.3825 | INTS9 | 0.3429 | AC008865.1 | 0.3053 |
| FUCA1 | 0.5695 | PTPN1 | 0.4845 | C18orf21 | 0.4302 | RP11-121A8.1 | 0.3825 | SYT8 | 0.3429 | FAM177A1 | 0.3053 |
| RNH1 | 0.5695 | SEC16A | 0.4845 | GAPT | 0.4302 | C19orf12 | 0.3825 | SFT2D1 | 0.3428 | FRMD3 | 0.3052 |
| RUFY1 | 0.5694 | SCAMP3 | 0.4844 | RP11-307C12.12 | 0.4300 | P4HTM | 0.3823 | NOP58 | 0.3428 | NELFA | 0.3052 |
| MUL1 | 0.5693 | APOPT1 | 0.4843 | GTF3A | 0.4300 | LSM6 | 0.3822 | HAX1 | 0.3428 | AC002116.8 | 0.3052 |
| FTSJ2 | 0.5691 | LMAN2L | 0.4842 | NEXN | 0.4300 | TRMT1 | 0.3822 | C19orf26 | 0.3427 | CDC45 | 0.3051 |
| PHLDB3 | 0.5691 | NDUFS6 | 0.4842 | RPS15 | 0.4299 | RP11-69E11.4 | 0.3822 | DAK | 0.3427 | AC012146.7 | 0.3051 |
| UAP1 | 0.5689 | RETN | 0.4841 | TTC27 | 0.4298 | CD47 | 0.3822 | LYSMD3 | 0.3427 | C3orf14 | 0.3051 |
| IER3 | 0.5686 | SIRT7 | 0.4841 | PCSK7 | 0.4298 | PLAT | 0.3821 | GP1BB | 0.3427 | RP11-408P14.1 | 0.3051 |
| THEMIS2 | 0.5685 | TMEM150B | 0.4840 | RP11-373L24.1 | 0.4297 | DSC2 | 0.3821 | KLRB1 | 0.3427 | PFDN4 | 0.3050 |
| RPS2P32 | 0.5685 | HRCT1 | 0.4840 | SCAND1 | 0.4296 | RBM10 | 0.3821 | TOR3A | 0.3427 | CHIT1 | 0.3049 |
| SLC17A9 | 0.5682 | GBP3 | 0.4840 | EIF3D | 0.4295 | HLA-F-AS1 | 0.3820 | DDX58 | 0.3427 | RECQL | 0.3049 |
| MIER2 | 0.5680 | RP11-122C5.1 | 0.4839 | MAP1LC3A | 0.4295 | TMC4 | 0.3819 | FAM21D | 0.3427 | FAM195B | 0.3049 |
| GBGT1 | 0.5679 | CELSR1 | 0.4839 | LRP10 | 0.4294 | YY2 | 0.3818 | RP11-385F5.5 | 0.3426 | DTWD1 | 0.3048 |
| ARSA | 0.5679 | BTG3 | 0.4839 | SCAMP2 | 0.4294 | ZNF444 | 0.3818 | FTH1P11 | 0.3426 | CEP164 | 0.3048 |
| TMEM248 | 0.5679 | RBM38 | 0.4838 | TMEM132A | 0.4294 | B3GNT7 | 0.3817 | MARS | 0.3426 | ZNF665 | 0.3048 |
| KLF16 | 0.5678 | EMC3 | 0.4837 | HCP5 | 0.4294 | CCR7 | 0.3817 | DPH2 | 0.3425 | ST3GAL1 | 0.3048 |
| CTF1 | 0.5678 | PGPEP1 | 0.4836 | FAM65C | 0.4293 | TMEM154 | 0.3817 | MYLPF | 0.3424 | MRC1 | 0.3048 |
| SEC13 | 0.5676 | GAP43 | 0.4836 | HOXB3 | 0.4293 | EXOSC9 | 0.3816 | TNFRSF11B | 0.3424 | PAXIP1-AS2 | 0.3048 |
| RP11-422J8.1 | 0.5676 | LEPREL4 | 0.4835 | ATP5SL | 0.4293 | AC002467.7 | 0.3816 | NSUN7 | 0.3424 | NCK2 | 0.3047 |
| CHST2 | 0.5674 | TARS | 0.4835 | CYP2R1 | 0.4293 | NRBF2 | 0.3816 | AC002398.11 | 0.3424 | CST1 | 0.3047 |
| HCLS1 | 0.5674 | GJA4 | 0.4834 | ALKBH1 | 0.4292 | ADAMTS12 | 0.3816 | TESC | 0.3424 | EIF4G2 | 0.3047 |
| FAM167B | 0.5673 | DPP3 | 0.4834 | GCH1 | 0.4292 | TYW1 | 0.3815 | RPS2P5 | 0.3424 | ZDHHC14 | 0.3047 |
| MS4A4A | 0.5672 | KRT10 | 0.4834 | WDR77 | 0.4292 | CTB-51J22.1 | 0.3813 | NDUFB5 | 0.3423 | XAF1 | 0.3047 |
| ADPRHL2 | 0.5672 | NUP85 | 0.4833 | PES1 | 0.4292 | GANAB | 0.3813 | SCRIB | 0.3422 | LGALS2 | 0.3047 |
| SNX20 | 0.5672 | ARFIP1 | 0.4832 | NAA20 | 0.4291 | MSX1 | 0.3813 | MGST3 | 0.3422 | S100Z | 0.3046 |
| BTBD19 | 0.5671 | PNO1 | 0.4832 | RPS11 | 0.4291 | CAP1 | 0.3812 | SLC25A1 | 0.3422 | APOA1 | 0.3045 |
| LST1 | 0.5671 | ATP5E | 0.4831 | HFE | 0.4291 | RABGEF1 | 0.3812 | TM9SF2 | 0.3422 | LEFTY2 | 0.3045 |
| RBP1 | 0.5670 | FADD | 0.4831 | AC005682.5 | 0.4290 | PAX8 | 0.3812 | RP11-77H9.2 | 0.3422 | OSR1 | 0.3044 |
| NOP10 | 0.5670 | C4orf47 | 0.4830 | TMEM91 | 0.4290 | PGM1 | 0.3812 | XRCC6 | 0.3421 | C14orf2 | 0.3044 |
| TNFAIP6 | 0.5670 | PSMB2 | 0.4829 | APBB1IP | 0.4289 | HK1 | 0.3811 | MRPS21 | 0.3421 | TM6SF1 | 0.3042 |
| PARP10 | 0.5669 | KANK2 | 0.4828 | CRABP2 | 0.4288 | CLEC12A | 0.3811 | CXCL5 | 0.3421 | MAATS1 | 0.3042 |
| SLC12A7 | 0.5668 | CXCL14 | 0.4828 | ATOX1 | 0.4287 | PRRT3-AS1 | 0.3811 | BLM | 0.3420 | GOLGA7 | 0.3042 |
| FER1L4 | 0.5668 | UPF1 | 0.4828 | HLA-DPA1 | 0.4287 | ZSCAN22 | 0.3810 | DHRS12 | 0.3420 | ZNF222 | 0.3042 |
| GTF2E2 | 0.5666 | IL16 | 0.4828 | IGFBP5 | 0.4287 | NME6 | 0.3810 | EWSR1 | 0.3420 | SYNCRIP | 0.3042 |
| SPATS2L | 0.5664 | AP000330.8 | 0.4828 | TTC39A | 0.4287 | TIFA | 0.3809 | HSBP1 | 0.3420 | GIMAP8 | 0.3041 |
| MTHFS | 0.5663 | LAMTOR4 | 0.4827 | ADCK4 | 0.4287 | PCDH12 | 0.3809 | RRP9 | 0.3419 | SIGLEC14 | 0.3041 |
| PSME4 | 0.5663 | CAPN15 | 0.4827 | CPD | 0.4286 | RP11-427H3.3 | 0.3809 | C5orf63 | 0.3419 | CHST13 | 0.3041 |
| GPR84 | 0.5663 | MPZL2 | 0.4826 | THUMPD3 | 0.4284 | SNX3 | 0.3809 | DKK1 | 0.3418 | CYB5A | 0.3040 |
| ADPRH | 0.5662 | NQO1 | 0.4825 | FBXL12 | 0.4284 | FAM78A | 0.3809 | DPH5 | 0.3418 | HSP90AA1 | 0.3039 |
| PDCD1LG2 | 0.5657 | KLF10 | 0.4825 | GPX1P1 | 0.4284 | ABCA7 | 0.3808 | CHD1 | 0.3417 | ADAMDEC1 | 0.3039 |
| DCPS | 0.5656 | ABT1 | 0.4825 | PLEKHM2 | 0.4284 | PTDSS2 | 0.3808 | RP11-256I23.3 | 0.3417 | ANGPT1 | 0.3039 |
| FUOM | 0.5656 | SKIV2L | 0.4825 | NKX2-5 | 0.4284 | TBCB | 0.3808 | CDA | 0.3416 | C5orf45 | 0.3039 |
| MYADM | 0.5654 | C4orf3 | 0.4823 | RPL23AP7 | 0.4284 | CMPK1 | 0.3807 | RP11-499E18.1 | 0.3415 | FAM127A | 0.3039 |
| RBCK1 | 0.5653 | NUB1 | 0.4823 | ETV5 | 0.4283 | ZNF574 | 0.3806 | SLC44A2 | 0.3415 | XRRA1 | 0.3039 |
| MAPKAP1 | 0.5652 | SHARPIN | 0.4823 | YIPF4 | 0.4283 | AAMDC | 0.3806 | BIRC7 | 0.3414 | FUT7 | 0.3038 |
| SEPT9 | 0.5650 | ACY1 | 0.4823 | H2AFY | 0.4283 | CTC-444N24.11 | 0.3804 | KRT80 | 0.3414 | FKBP14 | 0.3038 |
| AP4M1 | 0.5649 | KIAA1551 | 0.4822 | IGLC1 | 0.4283 | ZNF343 | 0.3804 | FKBP9L | 0.3413 | EIF2S1 | 0.3038 |
| LGALS9 | 0.5648 | SLX1A | 0.4822 | SLCO4A1 | 0.4283 | FCN1 | 0.3804 | BBS7 | 0.3413 | FAM122B | 0.3038 |
| PCGF1 | 0.5645 | C11orf35 | 0.4822 | VAC14 | 0.4282 | S100PBP | 0.3803 | MRPL35 | 0.3412 | MAMDC4 | 0.3038 |
| SRPR | 0.5644 | GM2A | 0.4821 | ALG8 | 0.4282 | GNRH1 | 0.3802 | CRNDE | 0.3412 | PRPF3 | 0.3037 |
| DENND2D | 0.5642 | SNUPN | 0.4820 | LMCD1 | 0.4281 | GTPBP2 | 0.3802 | NCKAP5L | 0.3412 | GMPR2 | 0.3037 |
| RP11-134G8.8 | 0.5641 | TACO1 | 0.4819 | PFDN5 | 0.4281 | DUSP11 | 0.3802 | ABCA13 | 0.3412 | ALDH3A1 | 0.3037 |
| HPS3 | 0.5641 | SNX21 | 0.4819 | RPL26L1 | 0.4281 | ACD | 0.3801 | UBE2D2 | 0.3411 | AC002480.3 | 0.3037 |
| BCL2L1 | 0.5639 | RABGGTA | 0.4819 | RBM28 | 0.4281 | FOLR3 | 0.3801 | TBC1D7 | 0.3411 | C1orf56 | 0.3036 |
| AKR1A1 | 0.5638 | RPL8 | 0.4818 | AC002398.9 | 0.4281 | SIAH2 | 0.3801 | MORC2 | 0.3411 | GINS2 | 0.3036 |
| TBX2 | 0.5637 | MMP1 | 0.4817 | C11orf96 | 0.4281 | RANBP3 | 0.3801 | OAS2 | 0.3410 | RP11-343C2.12 | 0.3036 |
| ARHGAP15 | 0.5637 | UBE2L6 | 0.4817 | WDR13 | 0.4281 | MED6 | 0.3801 | PCYOX1L | 0.3410 | GGNBP2 | 0.3036 |
| LAP3 | 0.5637 | NUP62 | 0.4817 | B3GALT4 | 0.4281 | WDR74 | 0.3801 | NACA | 0.3410 | VWF | 0.3035 |
| FBLN5 | 0.5636 | FAM129A | 0.4817 | CNDP2 | 0.4280 | RUSC1 | 0.3798 | KHNYN | 0.3409 | AC007285.6 | 0.3035 |
| FZD7 | 0.5636 | KRI1 | 0.4817 | SLC16A1 | 0.4279 | ASNS | 0.3798 | AP000695.6 | 0.3409 | HMGXB3 | 0.3034 |
| GNG5 | 0.5635 | IGHA1 | 0.4816 | GOLGA5 | 0.4278 | UBE3C | 0.3798 | UQCRH | 0.3409 | RP11-169K16.7 | 0.3034 |
| TNFAIP2 | 0.5634 | OXLD1 | 0.4816 | CSNK2B | 0.4278 | NSUN4 | 0.3798 | PTGES3 | 0.3409 | RP5-1042I8.7 | 0.3034 |
| HMG20B | 0.5632 | TECR | 0.4816 | MAP1S | 0.4277 | MSC | 0.3798 | C12orf49 | 0.3409 | VPREB3 | 0.3034 |
| SZRD1 | 0.5632 | TRAF3IP3 | 0.4814 | NMNAT1 | 0.4277 | PPM1N | 0.3796 | PLAGL1 | 0.3409 | CBWD5 | 0.3033 |
| ABCB8 | 0.5632 | RNASEK | 0.4814 | ZFYVE1 | 0.4276 | RP11-475C16.1 | 0.3794 | TVP23C | 0.3409 | TCEAL4 | 0.3033 |
| COX19 | 0.5632 | DGUOK-AS1 | 0.4814 | IP6K2 | 0.4276 | NUDT9 | 0.3794 | RILPL1 | 0.3408 | REST | 0.3032 |
| LAIR1 | 0.5631 | PLA2G5 | 0.4814 | B3GNTL1 | 0.4274 | NDUFB3 | 0.3794 | KDM2A | 0.3408 | TUBA1B | 0.3032 |
| CANT1 | 0.5629 | C6orf1 | 0.4813 | CD93 | 0.4273 | APOBEC3B | 0.3794 | AMPD3 | 0.3407 | CDRT4 | 0.3031 |
| CTC-425F1.4 | 0.5629 | CHEK2 | 0.4813 | FBXL6 | 0.4273 | PIN4 | 0.3794 | HSPA9 | 0.3407 | DDX23 | 0.3029 |
| KCNK6 | 0.5628 | GLB1L | 0.4813 | CEBPG | 0.4272 | GRINA | 0.3794 | DSTN | 0.3407 | PIP5K1C | 0.3028 |
| TMEM45A | 0.5628 | PEF1 | 0.4812 | NOC4L | 0.4271 | DNAJC8 | 0.3793 | BIRC5 | 0.3406 | RINT1 | 0.3028 |
| TXNDC11 | 0.5625 | TMEM70 | 0.4812 | ANKLE2 | 0.4270 | RPL29 | 0.3793 | ADH5 | 0.3406 | NIPA2 | 0.3028 |
| RP5-940J5.9 | 0.5624 | CTC-503J8.6 | 0.4811 | MRPS34 | 0.4270 | RP11-697N18.3 | 0.3793 | R3HCC1 | 0.3406 | POLE2 | 0.3028 |
| CD86 | 0.5623 | LOXL1-AS1 | 0.4811 | NOL6 | 0.4270 | RPL17 | 0.3793 | RPL39 | 0.3405 | RBM19 | 0.3028 |
| SPINT1 | 0.5623 | HAPLN3 | 0.4810 | TDO2 | 0.4270 | NSA2 | 0.3793 | CTD-2540B15.11 | 0.3405 | BYSL | 0.3026 |
| SLC25A37 | 0.5623 | ISLR | 0.4810 | TIMM10 | 0.4270 | FOXP4 | 0.3792 | TOR1AIP2 | 0.3403 | MOCS3 | 0.3025 |
| CLEC18B | 0.5621 | SP140 | 0.4810 | PRDM1 | 0.4269 | C19orf55 | 0.3791 | DISP1 | 0.3403 | SEPT6 | 0.3025 |
| TMEM147 | 0.5621 | CENPB | 0.4809 | RPL23AP79 | 0.4268 | LINC00475 | 0.3790 | RP11-674P19.2 | 0.3402 | IVNS1ABP | 0.3025 |
| NRP1 | 0.5621 | ZNF436 | 0.4809 | RNASEH2A | 0.4268 | CISD2 | 0.3789 | CD79A | 0.3402 | EHD1 | 0.3025 |
| AC093616.4 | 0.5620 | GLIPR2 | 0.4808 | ZNF317 | 0.4267 | TEC | 0.3788 | EXT1 | 0.3402 | IMPACT | 0.3024 |
| TRAPPC3 | 0.5620 | C12orf44 | 0.4808 | SETD8 | 0.4267 | SLIRP | 0.3788 | AP3B1 | 0.3402 | FTH1P20 | 0.3024 |
| APRT | 0.5620 | F13A1 | 0.4808 | RHOQ | 0.4267 | GIPC3 | 0.3787 | SCP2 | 0.3401 | RPS29 | 0.3024 |
| CD320 | 0.5618 | TBCA | 0.4807 | NEK8 | 0.4266 | PSMG2 | 0.3787 | TMEM216 | 0.3401 | LPCAT2 | 0.3023 |
| NME1-NME2 | 0.5616 | CCT6A | 0.4807 | CLPTM1 | 0.4265 | PIK3AP1 | 0.3786 | RP11-523G9.3 | 0.3401 | TUBA1A | 0.3023 |
| MSRB1 | 0.5616 | EPHA1 | 0.4805 | RP11-19E11.1 | 0.4265 | NSRP1 | 0.3785 | ABTB1 | 0.3401 | CLCN7 | 0.3022 |
| MBD4 | 0.5615 | FBXL8 | 0.4803 | BICD1 | 0.4265 | EXOSC3 | 0.3784 | DDX59 | 0.3401 | MON1A | 0.3021 |
| AKT1S1 | 0.5614 | MFSD1 | 0.4802 | U2AF1 | 0.4264 | ATG10 | 0.3784 | FAM189B | 0.3401 | AC004797.1 | 0.3021 |
| C5orf15 | 0.5613 | CHMP4B | 0.4802 | COPZ1 | 0.4264 | RPS15A | 0.3783 | BEST4 | 0.3401 | LIME1 | 0.3020 |
| PGK1 | 0.5613 | HOTAIRM1 | 0.4802 | AKAP13 | 0.4264 | SYCE3 | 0.3783 | CTD-2192J16.15 | 0.3401 | TRAPPC6A | 0.3020 |
| FBXO32 | 0.5613 | BLOC1S4 | 0.4802 | NOTCH3 | 0.4263 | H3F3B | 0.3782 | AC016629.8 | 0.3400 | UBA6-AS1 | 0.3020 |
| RP11-626G11.3 | 0.5612 | CLP1 | 0.4801 | RPS20 | 0.4262 | CRAT | 0.3781 | ARHGEF15 | 0.3400 | MRPL46 | 0.3019 |
| ARF6 | 0.5612 | AP2M1 | 0.4801 | LATS2 | 0.4262 | CTD-2306M10.1 | 0.3781 | AP2A1 | 0.3400 | DCAF13 | 0.3019 |
| TRPM4 | 0.5610 | DPP4 | 0.4800 | BOD1 | 0.4262 | GSTZ1 | 0.3780 | CCL18 | 0.3400 | ZNF296 | 0.3019 |
| PSME1 | 0.5610 | DDT | 0.4798 | RAN | 0.4261 | POLG | 0.3780 | HIF1A | 0.3399 | CABIN1 | 0.3019 |
| NAMPTL | 0.5609 | INTS1 | 0.4798 | RFX1 | 0.4261 | NPFF | 0.3780 | PTGER1 | 0.3399 | AP000347.4 | 0.3019 |
| RAC1 | 0.5609 | TMEM159 | 0.4798 | DDAH2 | 0.4261 | RWDD4 | 0.3780 | UTP18 | 0.3399 | MTHFD2 | 0.3019 |
| C7orf26 | 0.5607 | NUP205 | 0.4797 | GSN | 0.4261 | CTD-2521M24.9 | 0.3780 | ZSWIM1 | 0.3399 | SNAPC4 | 0.3019 |
| CD7 | 0.5604 | RFNG | 0.4794 | IL7R | 0.4260 | ATP5I | 0.3779 | PRMT6 | 0.3399 | C6orf226 | 0.3018 |
| ZNF576 | 0.5603 | RPS9 | 0.4792 | LMAN1 | 0.4260 | LSM3 | 0.3779 | RP11-1191J2.5 | 0.3399 | ASB16-AS1 | 0.3018 |
| R3HDM4 | 0.5603 | ITGA1 | 0.4792 | FKBP5 | 0.4260 | CMYA5 | 0.3779 | MORN2 | 0.3398 | CTC-459F4.3 | 0.3018 |
| TMEM51 | 0.5602 | LAMTOR5 | 0.4791 | FEM1C | 0.4260 | RP1-43E13.2 | 0.3778 | MIIP | 0.3397 | RAB22A | 0.3017 |
| WWTR1 | 0.5601 | MECP2 | 0.4791 | TIMM13 | 0.4259 | AKR1B10 | 0.3777 | FAM58A | 0.3397 | ACBD4 | 0.3017 |
| H6PD | 0.5601 | ZNF780A | 0.4791 | INO80E | 0.4259 | SRP14 | 0.3777 | LAMP3 | 0.3396 | TMEM168 | 0.3017 |
| BHLHE40 | 0.5600 | CTC-444N24.8 | 0.4791 | FKRP | 0.4259 | SMIM15 | 0.3777 | ACHE | 0.3396 | FAM132B | 0.3017 |
| TM2D2 | 0.5600 | ING2 | 0.4790 | GCHFR | 0.4259 | NMT1 | 0.3777 | ITGAL | 0.3396 | OR52K3P | 0.3017 |
| CD99P1 | 0.5600 | LINC01023 | 0.4790 | TMCO1 | 0.4257 | SUPT6H | 0.3776 | MSMP | 0.3395 | B9D1 | 0.3016 |
| PNPLA2 | 0.5598 | TLN1 | 0.4790 | SLC35B2 | 0.4257 | CITED4 | 0.3776 | UCK2 | 0.3395 | C4orf36 | 0.3016 |
| SLAMF9 | 0.5598 | CBWD1 | 0.4789 | DEGS1 | 0.4257 | TREX1 | 0.3776 | UBL4B | 0.3395 | C20orf26 | 0.3015 |
| PPP1R35 | 0.5598 | CD3D | 0.4788 | MBD3 | 0.4257 | MMAB | 0.3776 | MRP63 | 0.3394 | RHNO1 | 0.3014 |
| SSR4 | 0.5597 | ZBTB45 | 0.4788 | SSR4P1 | 0.4257 | ACOT12 | 0.3775 | TPP1 | 0.3394 | TRMT2B | 0.3014 |
| SAMD4B | 0.5597 | APLP2 | 0.4786 | ITIH1 | 0.4256 | ASAH1 | 0.3775 | TRIB2 | 0.3393 | SCAF4 | 0.3013 |
| MTMR14 | 0.5596 | P4HA3 | 0.4785 | SNX7 | 0.4256 | SHMT2 | 0.3775 | WDR70 | 0.3393 | S100A12 | 0.3012 |
| MMP2 | 0.5596 | TMEM110 | 0.4785 | MSTO1 | 0.4254 | COPS8 | 0.3774 | TAF7 | 0.3393 | VMA21 | 0.3012 |
| CDCP1 | 0.5596 | RASGRP4 | 0.4784 | THRAP3 | 0.4254 | RP11-252A24.7 | 0.3774 | MRPL33 | 0.3393 | AC005785.2 | 0.3012 |
| UGCG | 0.5596 | COMMD7 | 0.4782 | RP1-28H20.3 | 0.4253 | RBMX2 | 0.3774 | STC2 | 0.3392 | CLK2 | 0.3011 |
| IFI16 | 0.5595 | RCE1 | 0.4782 | WFDC2 | 0.4252 | RPL22 | 0.3774 | RP11-234A1.1 | 0.3392 | BRPF1 | 0.3011 |
| PI3 | 0.5595 | RP11-195F19.5 | 0.4780 | PDF | 0.4251 | ELOVL5 | 0.3773 | VAPB | 0.3392 | SLC37A4 | 0.3011 |
| ITGB4 | 0.5595 | TNFRSF11A | 0.4779 | SH3BP1 | 0.4251 | CTD-2336O2.1 | 0.3773 | C16orf72 | 0.3391 | SPTBN5 | 0.3010 |
| ZGPAT | 0.5594 | C9orf64 | 0.4779 | MS4A4E | 0.4251 | RP11-532F12.5 | 0.3773 | EFTUD2 | 0.3391 | ZNF140 | 0.3010 |
| FBLN7 | 0.5594 | DPCD | 0.4779 | AC006132.1 | 0.4251 | HOOK2 | 0.3772 | CCDC103 | 0.3391 | TMEM175 | 0.3010 |
| PLEKHF1 | 0.5594 | ATP2A3 | 0.4778 | RPAP3 | 0.4250 | CHEK1 | 0.3772 | SLC2A1 | 0.3390 | ERCC5 | 0.3010 |
| CD300C | 0.5593 | RNF216P1 | 0.4778 | NUP214 | 0.4249 | UTP15 | 0.3771 | ST7L | 0.3390 | CD3G | 0.3010 |
| LAMTOR2 | 0.5591 | EIF2B3 | 0.4778 | RNF31 | 0.4247 | C9orf142 | 0.3770 | CMKLR1 | 0.3390 | LRRC2 | 0.3009 |
| MARVELD1 | 0.5591 | DPH3 | 0.4777 | MPZL3 | 0.4247 | NDUFB10 | 0.3770 | ZNF287 | 0.3390 | RP11-22P4.1 | 0.3009 |
| C20orf24 | 0.5588 | DNM2 | 0.4777 | MRPS6 | 0.4247 | LSM1 | 0.3769 | ANKMY2 | 0.3390 | SLC25A28 | 0.3008 |
| CP | 0.5588 | CTD-2369P2.8 | 0.4776 | PTPN12 | 0.4246 | DSTNP2 | 0.3769 | OR7E38P | 0.3390 | MRPS26 | 0.3008 |
| C1QTNF1 | 0.5587 | SLC26A6 | 0.4776 | PHF13 | 0.4246 | CPSF1 | 0.3769 | LINC00926 | 0.3389 | MRPS23 | 0.3008 |
| GALNS | 0.5587 | CHRNA9 | 0.4776 | OLFML2A | 0.4245 | SLC27A4 | 0.3768 | C10orf55 | 0.3389 | FAM134B | 0.3008 |
| ITGB1 | 0.5587 | PINK1-AS | 0.4774 | C15orf40 | 0.4244 | IRF2 | 0.3768 | PLEKHA8P1 | 0.3389 | MYL6B | 0.3007 |
| CDC37 | 0.5586 | CDCA7L | 0.4774 | CDK11B | 0.4243 | ARL6IP5 | 0.3768 | OR2I1P | 0.3389 | PQBP1 | 0.3007 |
| UACA | 0.5585 | FBXO6 | 0.4774 | CTD-2085J24.4 | 0.4242 | ACBD6 | 0.3768 | ZNF625-ZNF20 | 0.3389 | ACRBP | 0.3007 |
| ARSD | 0.5584 | FAM162A | 0.4772 | RAP1A | 0.4241 | TAF6 | 0.3767 | NPR1 | 0.3388 | ZNF230 | 0.3007 |
| TMEM208 | 0.5583 | CRTAP | 0.4771 | HNRNPAB | 0.4241 | DNAJB9 | 0.3767 | SLC29A4 | 0.3388 | OFD1 | 0.3007 |
| AC007362.1 | 0.5583 | GMEB2 | 0.4771 | PCNXL3 | 0.4240 | ZFP36L1 | 0.3767 | LINC00467 | 0.3388 | CCIN | 0.3007 |
| C7orf50 | 0.5580 | PLCB2 | 0.4771 | ING1 | 0.4240 | MAPRE1 | 0.3766 | RP11-498C9.3 | 0.3388 | IFIH1 | 0.3006 |
| PRICKLE3 | 0.5579 | DNAJC30 | 0.4769 | TIMM8B | 0.4240 | LINC00313 | 0.3766 | CSF2RB | 0.3387 | RBP5 | 0.3006 |
| JMJD8 | 0.5576 | PPP1R14B | 0.4769 | ARMCX6 | 0.4240 | CD96 | 0.3766 | IL1B | 0.3387 | C16orf95 | 0.3006 |
| PSMC4 | 0.5576 | SSH3 | 0.4767 | COMMD9 | 0.4240 | COPB2 | 0.3764 | TSPAN1 | 0.3387 | JAZF1 | 0.3005 |
| VSIG4 | 0.5574 | ZNF18 | 0.4767 | TOR1B | 0.4237 | EPHA1-AS1 | 0.3763 | RP11-190A12.8 | 0.3386 | STRN4 | 0.3005 |
| FAM50A | 0.5573 | EPN1 | 0.4766 | OBSL1 | 0.4236 | FOLR2 | 0.3763 | CTC-273B12.6 | 0.3386 | RP11-3P17.3 | 0.3005 |
| GBE1 | 0.5573 | APEH | 0.4765 | SPG21 | 0.4236 | NDUFB1 | 0.3762 | TUBB | 0.3386 | EPO | 0.3004 |
| PTGS1 | 0.5573 | ADCK2 | 0.4764 | BABAM1 | 0.4235 | GRK6 | 0.3762 | RRM2 | 0.3386 | HNRNPA0 | 0.3004 |
| PPAN | 0.5573 | PRDX1 | 0.4763 | SERPINA5 | 0.4235 | NASP | 0.3761 | NAGS | 0.3386 | SCARA3 | 0.3003 |
| PLVAP | 0.5572 | TRIM22 | 0.4762 | SLC44A3 | 0.4235 | F2R | 0.3761 | DDX10 | 0.3385 | GSPT2 | 0.3003 |
| CUL7 | 0.5572 | SERPINF2 | 0.4762 | LRFN3 | 0.4234 | HDAC8 | 0.3761 | PALMD | 0.3385 | LRRC56 | 0.3003 |
| DEDD2 | 0.5572 | SLC25A24 | 0.4762 | MAPKAPK3 | 0.4234 | RAB4B | 0.3761 | RP5-1086K13.1 | 0.3385 | CTD-3049M7.1 | 0.3003 |
| PSMD8 | 0.5571 | TYK2 | 0.4761 | HAS2 | 0.4233 | KLHDC4 | 0.3761 | DHX16 | 0.3384 | COX20 | 0.3003 |
| LENG1 | 0.5571 | IRAK4 | 0.4761 | MGST1 | 0.4233 | MRPS9 | 0.3761 | RP6-42F4.1 | 0.3384 | PBX2 | 0.3003 |
| DDIT3 | 0.5570 | SCMH1 | 0.4760 | USF2 | 0.4233 | STARD5 | 0.3760 | ELF3 | 0.3384 | NR1D1 | 0.3002 |
| PCK2 | 0.5570 | STEAP1 | 0.4760 | LRRC59 | 0.4232 | CDC42EP3 | 0.3760 | TGIF2 | 0.3384 | MAP1LC3B2 | 0.3002 |
| LRRN4CL | 0.5569 | CCZ1 | 0.4759 | CEACAM4 | 0.4232 | MCRS1 | 0.3760 | CES1 | 0.3384 | CD28 | 0.3002 |
| C6orf141 | 0.5569 | FABP7 | 0.4759 | FAM32A | 0.4231 | COL5A3 | 0.3760 | GHRLOS | 0.3384 | DHPS | 0.3002 |
| SNRPB | 0.5568 | MTX1 | 0.4759 | CTB-89H12.4 | 0.4231 | TYMS | 0.3759 | PACSIN2 | 0.3383 | TSPAN2 | 0.3001 |
| PPCS | 0.5568 | PRRX1 | 0.4758 | SLN | 0.4230 | BANP | 0.3759 | C21orf119 | 0.3383 | RP3-483K16.4 | 0.3001 |
| ALDOA | 0.5567 | UBXN11 | 0.4758 | NFATC1 | 0.4230 | GPBP1L1 | 0.3759 | MIEN1 | 0.3383 | RP11-51O6.1 | 0.3001 |
| MILR1 | 0.5566 | PTRH2 | 0.4757 | CYHR1 | 0.4229 | RP11-283G6.4 | 0.3759 | JMJD4 | 0.3383 | GBAS | 0.3001 |
| VOPP1 | 0.5566 | LY86 | 0.4757 | FAM127B | 0.4228 | IDO1 | 0.3759 | SDHC | 0.3380 | RP11-279O9.4 | 0.3001 |
| AVEN | 0.5564 | RP11-63P12.6 | 0.4757 | IL24 | 0.4228 | ORAI2 | 0.3758 | ERAP1 | 0.3380 | TMEM167B | 0.3001 |
| LEPREL1 | 0.5564 | LYZ | 0.4756 | LRR1 | 0.4227 | RPL24 | 0.3757 | EEF1B2 | 0.3380 | SIGLEC17P | 0.3001 |
|  |  | TAF12 | 0.4755 | ACCS | 0.4227 | VPS29 | 0.3757 | GGA1 | 0.3380 | CTD-2587M2.1 | 0.3000 |

CPTAC protein datasets (r value, Pearson correlation)

| Genes | r value | Genes | r value | Genes | r value | Genes | r value | Genes | r value | Genes | r value |
| --- | --- | --- | --- | --- | --- | --- | --- | --- | --- | --- | --- |
| FAM20C | 1.0000 | IMPDH1 | 0.6053 | CD14 | 0.5658 | UPP1 | 0.5461 | RPS15 | 0.5290 | TXNDC12 | 0.5160 |
| HSPA5 | 0.7152 | RPL21 | 0.6051 | RPS27L | 0.5653 | RPL14 | 0.5458 | ITGAM | 0.5287 | MAN2B1 | 0.5160 |
| SERPINA3 | 0.6909 | CRTAP | 0.6047 | SLC16A3 | 0.5648 | ORM1 | 0.5456 | P3H4 | 0.5286 | HIST1H3A | 0.5159 |
| ITGA5 | 0.6839 | TREM1 | 0.6043 | FKBP10 | 0.5636 | SLC39A14 | 0.5454 | S100A11 | 0.5285 | NFKB1 | 0.5156 |
| PFN1 | 0.6802 | RPL3 | 0.6042 | LOXL3 | 0.5634 | NRP1 | 0.5448 | CHPF | 0.5285 | IRAK4 | 0.5153 |
| C1R | 0.6787 | NCF4 | 0.6037 | RPLP2 | 0.5631 | IGFBP2 | 0.5447 | CTSC | 0.5284 | CCL2 | 0.5152 |
| HSP90B1 | 0.6767 | RPSA | 0.6033 | RPL8 | 0.5628 | TCIRG1 | 0.5446 | VSIG4 | 0.5283 | TRIP10 | 0.5151 |
| PDIA6 | 0.6721 | C1RL | 0.6022 | EIF4A1 | 0.5620 | LCN2 | 0.5445 | FOSL2 | 0.5282 | TGFB1 | 0.5140 |
| CALR | 0.6719 | NAMPT | 0.6004 | H6PD | 0.5614 | TRIOBP | 0.5444 | ERO1A | 0.5280 | S100P | 0.5140 |
| SERPINE1 | 0.6656 | FKBP11 | 0.5992 | RPLP0 | 0.5601 | ITIH4 | 0.5435 | C2 | 0.5280 | TMEM43 | 0.5139 |
| ANGPTL4 | 0.6638 | PGLYRP2 | 0.5985 | TGM2 | 0.5595 | PADI4 | 0.5431 | CPN2 | 0.5273 | ACTN1 | 0.5128 |
| PLOD3 | 0.6633 | SUMF1 | 0.5983 | PMM2 | 0.5590 | RPL28 | 0.5430 | COPB1 | 0.5271 | MAPK13 | 0.5127 |
| CHI3L1 | 0.6615 | RPL23 | 0.5980 | SIPA1 | 0.5589 | TCN1 | 0.5427 | IGFALS | 0.5271 | APOA1 | 0.5122 |
| PTX3 | 0.6613 | ANPEP | 0.5975 | RPL17 | 0.5588 | GPX3 | 0.5422 | MYL12A | 0.5270 | AZGP1 | 0.5118 |
| CEBPB | 0.6611 | IGLL5 | 0.5975 | TEP1 | 0.5580 | HDLBP | 0.5421 | COL12A1 | 0.5269 | LAMB1 | 0.5113 |
| P4HB | 0.6571 | IQGAP1 | 0.5957 | HK2 | 0.5576 | MGAM | 0.5419 | RASSF1 | 0.5266 | ARHGEF1 | 0.5111 |
| TGFBI | 0.6527 | PYGL | 0.5948 | PRDX4 | 0.5570 | ENG | 0.5419 | PLIN3 | 0.5264 | F10 | 0.5108 |
| PLOD1 | 0.6527 | ITGA3 | 0.5940 | ABCC3 | 0.5567 | DNAJC13 | 0.5416 | MMP8 | 0.5263 | COL6A1 | 0.5107 |
| PROS1 | 0.6507 | CCL18 | 0.5928 | SERPINF2 | 0.5566 | PDIA3 | 0.5414 | FNTA | 0.5261 | ARID3A | 0.5104 |
| PLOD2 | 0.6466 | RAB27A | 0.5924 | C7 | 0.5564 | F13A1 | 0.5411 | CHI3L2 | 0.5261 | SLPI | 0.5101 |
| MYH9 | 0.6462 | RPS6 | 0.5924 | ADM | 0.5562 | ARHGAP18 | 0.5407 | FAM206A | 0.5258 | DERA | 0.5099 |
| C1S | 0.6454 | CASP4 | 0.5907 | ARPC5 | 0.5559 | SRGN | 0.5393 | KNG1 | 0.5258 | FLII | 0.5090 |
| IKBIP | 0.6436 | CPB2 | 0.5903 | S100A10 | 0.5556 | CERCAM | 0.5393 | P4HA1 | 0.5258 | ALOX5 | 0.5088 |
| LOX | 0.6406 | FN1 | 0.5899 | MLKL | 0.5555 | ARHGDIB | 0.5389 | ELANE | 0.5254 | ENPEP | 0.5083 |
| MYL6 | 0.6399 | RPL7 | 0.5892 | SERPINA10 | 0.5554 | SERPING1 | 0.5384 | SERPINB8 | 0.5252 | APOL1 | 0.5082 |
| DPYD | 0.6398 | RPL9 | 0.5891 | EIF2S3 | 0.5548 | C8B | 0.5384 | SHBG | 0.5252 | RPN2 | 0.5079 |
| CLU | 0.6390 | NCF2 | 0.5891 | CFH | 0.5546 | SERPINA6 | 0.5383 | CRISP3 | 0.5250 | DEFA4 | 0.5079 |
| ITIH2 | 0.6373 | PLTP | 0.5862 | COPE | 0.5541 | IGLL1 | 0.5375 | C3 | 0.5244 | CD163 | 0.5078 |
| SPON2 | 0.6341 | DNAJC3 | 0.5849 | HK3 | 0.5536 | PCSK5 | 0.5373 | INHBC | 0.5239 | GFPT2 | 0.5077 |
| PCOLCE2 | 0.6339 | JUNB | 0.5844 | SIL1 | 0.5536 | RPL4 | 0.5372 | OTULIN | 0.5238 | RETN | 0.5076 |
| STC1 | 0.6332 | ITGA4 | 0.5838 | RPL24 | 0.5528 | RNF24 | 0.5370 | RNASE2 | 0.5236 | RPS9 | 0.5075 |
| TIMP1 | 0.6320 | S100A4 | 0.5837 | AZU1 | 0.5524 | PCOLCE | 0.5369 | SIGLEC5 | 0.5233 | HIST1H1B | 0.5074 |
| CP | 0.6314 | LTF | 0.5821 | RPL7A | 0.5523 | ATP13A3 | 0.5368 | ACTN4 | 0.5227 | TNFAIP2 | 0.5066 |
| SERPINH1 | 0.6309 | MGAT1 | 0.5800 | IGKV1-5 | 0.5522 | FGA | 0.5365 | C1QB | 0.5222 | GALNT2 | 0.5058 |
| CA12 | 0.6304 | ARPC1B | 0.5797 | CALU | 0.5521 | SERPINA4 | 0.5365 | RAC2 | 0.5217 | F9 | 0.5058 |
| LOXL2 | 0.6299 | FAM129B | 0.5795 | HABP2 | 0.5518 | C8G | 0.5363 | CKAP4 | 0.5216 | LTBP1 | 0.5052 |
| BMP1 | 0.6296 | SDF2L1 | 0.5790 | FCN1 | 0.5516 | RPS3 | 0.5357 | FHAD1 | 0.5206 | ALB | 0.5049 |
| COLGALT1 | 0.6247 | COL5A1 | 0.5781 | IGFBP3 | 0.5513 | C1QC | 0.5356 | RPL26 | 0.5200 | RBM34 | 0.5048 |
| FGB | 0.6234 | FLNA | 0.5774 | DOK3 | 0.5513 | DYSF | 0.5353 | CTSB | 0.5197 | OLFM4 | 0.5046 |
| MVP | 0.6217 | PLBD1 | 0.5769 | C8A | 0.5513 | LBP | 0.5352 | RPL6 | 0.5194 | EXT2 | 0.5044 |
| CLIC1 | 0.6206 | GMFG | 0.5758 | S100A12 | 0.5511 | PROZ | 0.5351 | AP3B1 | 0.5190 | F13B | 0.5034 |
| VASP | 0.6203 | TUBA1C | 0.5756 | APOH | 0.5508 | RIN3 | 0.5350 | AEBP1 | 0.5189 | C9 | 0.5030 |
| TLN1 | 0.6186 | GANAB | 0.5753 | RPS8 | 0.5506 | RPS7 | 0.5347 | LIMK2 | 0.5184 | DNAJB9 | 0.5028 |
| MPO | 0.6185 | CAMP | 0.5750 | SERPINA1 | 0.5496 | TAGLN2 | 0.5344 | CEACAM8 | 0.5183 | PTPN6 | 0.5027 |
| B4GALT1 | 0.6166 | MNDA | 0.5742 | ADPGK | 0.5496 | HIST1H4A | 0.5338 | RNASE4 | 0.5182 | LGALS3 | 0.5027 |
| CHMP4A | 0.6154 | PTPN12 | 0.5740 | RPLP1 | 0.5491 | TGIF1 | 0.5338 | PIEZO1 | 0.5182 | ADGRE5 | 0.5026 |
| PDIA4 | 0.6151 | EEF1A1 | 0.5722 | POFUT2 | 0.5487 | SHC1 | 0.5338 | CASP8 | 0.5180 | ANXA4 | 0.5026 |
| CTSG | 0.6136 | CFI | 0.5719 | CDA | 0.5483 | SAA2-SAA4 | 0.5336 | HRG | 0.5179 | CHPF2 | 0.5026 |
| VTN | 0.6131 | ANXA2 | 0.5714 | ASCC2 | 0.5479 | A1BG | 0.5335 | PIK3AP1 | 0.5177 | OAF | 0.5026 |
| RPS14 | 0.6103 | LMAN1 | 0.5710 | LYZ | 0.5475 | DDOST | 0.5324 | FES | 0.5175 | UGGT1 | 0.5024 |
| PTPN1 | 0.6096 | ACTBL2 | 0.5707 | ETF1 | 0.5474 | FERMT3 | 0.5324 | TCAF2 | 0.5173 | APOC1 | 0.5020 |
| IGHG1 | 0.6095 | NCF1 | 0.5694 | CXCL5 | 0.5474 | LMAN2 | 0.5319 | C6 | 0.5172 | PLVAP | 0.5010 |
| PLAU | 0.6094 | MAP2K3 | 0.5688 | EFEMP1 | 0.5473 | COPB2 | 0.5315 | RPS11 | 0.5171 | QTRT2 | 0.5008 |
| F2 | 0.6094 | COL5A2 | 0.5684 | S100A8 | 0.5472 | KLKB1 | 0.5311 | ASCC3 | 0.5170 | APOF | 0.5004 |
| PLG | 0.6079 | P4HA2 | 0.5683 | P3H1 | 0.5471 | EIF5A | 0.5309 | STXBP2 | 0.5168 | RPS13 | 0.5004 |
| FGG | 0.6078 | FHOD1 | 0.5680 | FNDC3B | 0.5469 | GYS1 | 0.5307 | COL6A3 | 0.5162 | ANG | 0.5004 |
| C5 | 0.6076 | RPL5 | 0.5678 | PPIB | 0.5468 | STK10 | 0.5300 | RIOK3 | 0.5162 | ALOX5AP | 0.5004 |
| RNASE3 | 0.6057 | GBE1 | 0.5660 | ITPKC | 0.5467 | MYD88 | 0.5292 | MAN1C1 | 0.5161 | MICALL2 | 0.5003 |
| PARP4 | 0.6057 |  |  |  |  |  |  |  |  |  |  |

**Table S5** Univariate and multivariate Cox regression analyses between *FAM20C* expression and pathological characteristics of glioma (Age, *IDH*, 1p19q deletion)

| Univariate COX regression in TCGA glioma | | | | |
| --- | --- | --- | --- | --- |
| ID | HR | HR.95L | HR.95H | *p*-value |
| Age | 1.03594 | 1.02826 | 1.04368 | 1.37E-20 |
| IDH | 0.40264 | 0.32617 | 0.49705 | 2.56E-17 |
| 1p19q | 0.81336 | 0.66226 | 0.99895 | 0.04884 |
| FAM20C | 1.57611 | 1.44336 | 1.72107 | 3.88E-24 |
|  |  |  |  |  |
| Multivariate COX regression in TCGA glioma | | | | |
| id | HR | HR.95L | HR.95H | *p*-value |
| Age | 1.0276 | 1.01941 | 1.03586 | 2.61E-11 |
| IDH | 0.81277 | 0.61969 | 1.06601 | 0.13412 |
| 1p19q | 0.91518 | 0.73593 | 1.13809 | 0.42548 |
| FAM20C | 1.34845 | 1.20349 | 1.51086 | 2.57E-07 |
|  |  |  |  |  |
| Univariate COX regression in CGGA glioma | | | | |
| ID | HR | HR.95L | HR.95H | *p*-value |
| Age | 1.04062 | 1.0269 | 1.05451 | 4.03E-09 |
| IDH | 0.39587 | 0.2903 | 0.53982 | 4.74E-09 |
| 1p19q | 0.83141 | 0.70232 | 0.98422 | 0.03198 |
| FAM20C | 1.56385 | 1.38174 | 1.76997 | 1.45E-12 |
|  |  |  |  |  |
| Multivariate COX regression in CGGA glioma | | | | |
| id | HR | HR.95L | HR.95H | *p*-value |
| Age | 1.02412 | 1.01022 | 1.03821 | 0.00063 |
| IDH | 0.59666 | 0.41899 | 0.84967 | 0.00419 |
| 1p19q | 0.85384 | 0.72197 | 1.00979 | 0.06487 |
| FAM20C | 1.35642 | 1.17755 | 1.56246 | 2.4E-05 |
